# Supplementary material
Source: ML conference proceedings conference paper supplement (https://openreview.net/forum?id=4uRlbSNevR)
Supplement: supplementary_material [file With_Appendix_On_Federated_Compositional_Optimization.pdf › Supplementary/With_Appendix_On_Federated_Compositional_Optimization.pdf]

# On Federated Compositional Optimization: Algorithms, Analysis, and Guarantees

Prashant Khanduri<sup>†</sup>, Chengyin Li<sup>‡</sup>, Rafi-Ibn Sultan<sup>†</sup>, Aditi Sarker<sup>†</sup>,  
Yao Qiang<sup>◊</sup>, Joerg Kliewer<sup>\*</sup>, Dongxiao Zhu<sup>†</sup>

<sup>†</sup>Wayne State University, <sup>‡</sup>Henry Ford Health, <sup>◊</sup>Oakland University,  
<sup>\*</sup>New Jersey Institute of Technology

khanduri.prashant@wayne.edu, cli6@hfhs.org, rafis@wayne.edu, hq1351@wayne.edu, qiang@oakland.edu,  
joerg.kliewer@njit.edu, dzhu@wayne.edu

Reviewed on OpenReview: <https://openreview.net/pdf?id=4uRl bSNe vR>

## Abstract

Compositional optimization (CO) has recently gained popularity due to its applications in many machine learning applications. The large-scale and distributed nature of data necessitates efficient federated learning (FL) algorithms for CO, but the compositional structure of the objective poses significant challenges. Current methods either rely on large batch gradients (which are impractical), require expensive computations, or suffer from suboptimal guarantees. To address these challenges, we propose efficient FedAvg-type algorithms for solving non-convex CO in the FL setting. We first theoretically establish that standard FedAvg fails in solving the federated CO problems due to data heterogeneity, which amplifies bias in local gradient estimates. Our analysis shows that controlling this bias necessarily requires either *additional communication* or *additional structural assumptions*. To this end, we develop two algorithms for solving the federated CO problem. First, we propose FedDRO that utilizes the compositional problem structure to design a communication strategy that allows FedAvg to converge. FedDRO achieves a sample complexity of  $\mathcal{O}(\epsilon^{-2})$  and a communication complexity of  $\mathcal{O}(\epsilon^{-3/2})$  when the inner compositional objective is low-dimensional. When the inner objective is high-dimensional, the communication complexity increases to  $\mathcal{O}(\epsilon^{-2})$ , while the sample complexity remains  $\mathcal{O}(\epsilon^{-2})$ . Then we propose DS-FedDRO, a two-sided learning rate algorithm that leverages an additional assumption to improve upon the communication complexity of FedDRO. DS-FedDRO achieves the optimal  $\mathcal{O}(\epsilon^{-2})$  sample and  $\mathcal{O}(\epsilon^{-1})$  communication complexity irrespective of the dimensionality of the inner compositional objective. We corroborate our theoretical findings with empirical studies on large-scale CO problems.

## 1 Introduction

Compositional optimization (CO) problems deal with the minimization of the composition of functions. A standard CO problem takes the form

$$\min_{x \in \mathbb{R}^d} f(g(x)) \quad \text{where} \quad g(x) := \mathbb{E}_{\zeta \sim \mathcal{D}_g} [g(x; \zeta)], \quad (1)$$

where  $x \in \mathbb{R}^d$  is the optimization variable,  $f : \mathbb{R}^{d_g} \rightarrow \mathbb{R}$  and  $g : \mathbb{R}^d \rightarrow \mathbb{R}^{d_g}$  are smooth functions, and  $\zeta \sim \mathcal{D}_g$  represents a stochastic sample of  $g(\cdot)$  from distribution  $\mathcal{D}_g$ . CO finds applications in a broad range of machine learning applications, including but not limited to distributionally robust optimization (DRO) Qi et al. (2022), meta-learning Finn et al. (2017), hyperparameter tuning Franceschi et al. (2018), phase retrieval Duchi & Ruan (2019), portfolio optimization Shapiro et al. (2021), and reinforcement learning Wang et al. (2017). In this work, we focus on a more challenging version of the CO problem (1) that often arises in the DRO

formulation Haddadpour et al. (2022). Specifically, the problems that jointly minimize the summation of a compositional and a non-compositional objective. DRO has recently garnered significant attention from the research community because of its capability of handling noisy labels Chen et al. (2022), training fair machine learning models Qi et al. (2022), imbalanced Qi et al. (2020a) and adversarial data Chen & Paschalidis (2018). A standard approach to solve DRO is to utilize primal-dual algorithms Nemirovski et al. (2009) that are inherently slow because of a large number of stochastic constraints. The CO formulation enables the development of faster (dual-free) primal-only DRO algorithms Haddadpour et al. (2022). The majority of existing works to solve CO problems consider a centralized setting wherein all the data samples are available on a single server. However, modern large-scale machine-learning applications are characterized by the distributed collection of data by multiple clients Kairouz et al. (2021). This necessitates the development of distributed algorithms to solve the DRO problem.

Federated learning (FL) is a distributed learning paradigm that allows clients to solve a joint problem in collaboration with a server while keeping the data of each client private McMahan et al. (2017). The clients act as computing units where, within each communication round, the clients perform multiple updates while the server orchestrates the parameter sharing among clients. Numerous FL algorithms exist in the literature to tackle standard (non-compositional) optimization problems Li et al. (2019; 2020); Karimireddy et al. (2019); Sharma et al. (2019); Zhang et al. (2021); Khanduri et al. (2021); Karimireddy et al. (2020). However, there is a lack of efficient distributed implementations when it comes to CO problems. The major challenges in developing FL algorithms for solving the CO problem are:

[C1]. The compositional structure of the problem leads to *biased* stochastic gradient estimates, and this bias is amplified during local updates, which makes the analysis intractable Chen et al. (2021).

[C2]. Typically, data distribution at each client is different, resulting in *client drift* during local updates, which leads to divergence of federated CO algorithms. This is in sharp contrast to the standard FedAvg for non-CO problems, where client drift can be controlled Karimireddy et al. (2019).

[C3]. Majority of algorithms for solving CO rely on accuracy-dependent *large batch* gradients Huang et al. (2021); Haddadpour et al. (2022); Guo et al. (2022); Wu et al. (2024).

[C4]. The developed algorithms rely on the computation of expensive matrix (or vector) *projections* Gao (2024); Huang et al. (2023) or complex *multi-loop* structure Tarzanagh et al. (2022); Haddadpour et al. (2022); Huang et al. (2023).

These challenges naturally lead to the following question:

*Can we develop FL algorithms that tackle [C1] – [C4] to solve CO in a federated setting?*

In this work, we address the above question and develop novel FL algorithms to solve CO problems. Although our development focuses on the DRO problem, the algorithms developed in our work have wider applicability to other general CO problems. The major contributions of our work are:

- We for the first time present a negative result that establishes that the vanilla FedAvg (customized to CO) is **incapable of solving** the CO problems as it leads to bias amplification during the local updates. This shows that either *additional communication/processing* or *additional assumptions* are required by FedAvg to mitigate the bias in the local gradient estimation.
- We develop two novel FL algorithms FedDRO and DS-FedDRO, for solving problems with both **compositional and non-compositional non-convex objectives**. To our knowledge, such algorithms have been absent from the open literature so far. Importantly, FedDRO and DS-FedDRO address the above-mentioned challenges by developing several key innovations in the algorithm design.
- FedDRO addresses [C1] – [C4] by adopting a **communication strategy** and **gradient estimators** that utilize the specific CO problem structure and allow us to control the gradient bias at the cost of additional (often low-dimensional) communication. In contrast, DS-FedDRO addresses these challenges by leveraging an additional structural assumption and introducing a **double-sided learning-rate** CO algorithm for FL, wherein the server-side aggregation mirrors the update dynamics of local clients.

• We establish the **convergence** of FedDRO and DS-FedDRO and show that to achieve an  $\epsilon$ -stationary point both algorithms require  $\mathcal{O}(\epsilon^{-2})$  samples while achieving **linear speed-up** with the number of clients, i.e., requiring  $\mathcal{O}(K^{-1}\epsilon^{-2})$  samples per client. Moreover, FedDRO achieves a communication complexity of  $\mathcal{O}(\epsilon^{-3/2})$  when the inner compositional objective is low-dimensional and  $\mathcal{O}(\epsilon^{-2})$  when it is high-dimensional, while DS-FedDRO achieves an improved communication complexity of  $\mathcal{O}(\epsilon^{-1})$  irrespective of the dimensionality of the inner composite objective.

## 2 Problem setting

We focus on a general version of the CO problem defined in (1). We consider the following problem that often arises in DRO (see Section 2.1) in a FL setting with  $K$  clients

$$\inf_{x \in \mathbb{R}^d} \{ \Phi(x) := h(x) + f(g(x)) \} \text{ with } h(x) := \frac{1}{K} \sum_{k=1}^K h_k(x) \text{ and } g(x) := \frac{1}{K} \sum_{k=1}^K g_k(x), \quad (2)$$

where each client  $k \in [K]$  has access to the local functions  $h_k : \mathbb{R}^d \rightarrow \mathbb{R}$  and  $g_k : \mathbb{R}^d \rightarrow \mathbb{R}^{d_g}$  while  $f(\cdot)$  is same as (1). The local functions  $h_k(\cdot)$  and  $g_k(\cdot)$  at each client  $k \in [K]$  are:  $h_k(x) = \mathbb{E}_{\xi_k \sim \mathcal{D}_{h_k}} [h_k(x; \xi_k)]$  and  $g_k(x) = \mathbb{E}_{\zeta_k \sim \mathcal{D}_{g_k}} [g_k(x; \zeta_k)]$  and where  $\xi_k \sim \mathcal{D}_{h_k}$  (resp.  $\zeta_k \sim \mathcal{D}_{g_k}$ ) represents a sample of  $h_k(\cdot)$  (resp.  $g_k(\cdot)$ ) from distribution  $\mathcal{D}_{h_k}$  (resp.  $\mathcal{D}_{g_k}$ ).

In comparison to the basic CO (1), (2) is significantly challenging, first, because of the presence of both compositional and non-compositional objectives, and second, because of the distributed nature of the compositional function  $g(\cdot)$ . We would also like to point out that the algorithms and the analysis presented in this work can be easily extended to the problems where  $f(\cdot) := 1/K \sum_{k=1}^K f_k(\cdot)$  is also distributed.

*Remark 2.1* (Comparison to Gao et al. (2022) and Huang et al. (2021)). Formulation (2) is significantly different than the setting considered in Huang et al. (2021); Gao et al. (2022). Specifically, our formulation considers a setting where the compositional functions are distributed across agents, i.e., the function is  $g = 1/K \sum_{k=1}^K g_k(x)$ . In contrast, Huang et al. (2021); Gao et al. (2022) consider a setting with objective  $1/K \sum_{k=1}^K f_k(g_k(\cdot))$ , note here that the compositional function is local to each agent. This implies that algorithms developed in Huang et al. (2021); Gao et al. (2022) cannot solve problem (2). Importantly, problem (2) models a realistic FL setting while being more challenging compared to Huang et al. (2021); Gao et al. (2022) since in (2) the data heterogeneity of the inner problem also plays a role in the convergence of the FL algorithm. Please see the discussion in Appendix A.1 for more details.

### 2.1 Examples: CO reformulation of DRO problems

Here, we discuss different DRO formulations that can be efficiently solved using CO Haddadpour et al. (2022). DRO problem with  $m$  training samples denoted as  $\{\zeta_i\}_{i=1}^m$  is

$$\min_{x \in \mathbb{R}^d} \max_{\mathbf{p} \in P_m} \sum_{i=1}^m p_i \ell(x; \zeta_i) - \lambda D_*(\mathbf{p}, \mathbf{1}/m) \quad (3)$$

where  $x \in \mathbb{R}^d$  is the model parameter,  $P_m := \{\mathbf{p} \in R^m : \sum_{i=1}^m p_i = 1, p_i \geq 0\}$  is  $m$ -dimensional simplex,  $D_*(\mathbf{p}, \mathbf{1}/m)$  is a divergence metric that measures distance between  $\mathbf{p}$  and uniform probability  $\mathbf{1}/m \in R^m$ , and  $\ell(x, \zeta_i)$  denotes the loss on sample  $\zeta_i$ ,  $\rho$  is a constraint parameter, and  $\lambda$  is a hyperparameter. Next, we discuss two popular reformulations of (3) in the form of CO problems.

**DRO with KL-divergence.** Problem (3) is referred to as a KL-regularized DRO when the distance metric  $D_*(\mathbf{p}, \mathbf{1}/m)$  is the KL-Divergence, i.e., we have  $D_*(\mathbf{p}, \mathbf{1}/m) = D_{\text{KL}}(\mathbf{p}, \mathbf{1}/m)$  with  $D_{\text{KL}}(\mathbf{p}, \mathbf{1}/m) := \sum_{i=1}^m p_i \log(p_i m)$ . For this case, an equivalent reformulation of (3) is

$$\min_{x \in \mathbb{R}^d} \log \left( \frac{1}{m} \sum_{i=1}^m \exp \left( \frac{\ell(x; \zeta_i)}{\lambda} \right) \right), \quad (4)$$

which is a CO with  $g(x) = 1/m \sum_{i=1}^m \exp(\ell(x; \zeta_i)/\lambda)$ ,  $f(g(x)) = \log(g(x))$  and  $h(x) = 0$ .

**DRO with  $\chi^2$ -divergence.** Similar to KL-regularized DRO, (3) is referred to as a  $\chi^2$ -regularized DRO

Table 1: Comparison with the existing works. CO-ND refers to CO with a non-distributed compositional part (see Remark 2.1). CO + Non-CO refers to problems with both CO and Non-CO objectives. Multi-CO refers to a multi-level CO problem. VR refers to variance reduction. (I) and (O) refers to the inner and outer loop, respectively. <sup>†</sup>These focus on conditional CO problems (see Wu et al. (2024)), <sup>‡</sup>Algorithm Fed-DR-SCGD relies on expensive matrix projections. \*Theoretical guarantees for GCIVR exist only for the finite sample setting with  $m$  total samples.

| ALGORITHM                                | SETTING     | UPDATE       | BATCH                             | COMP.                                                       | COMM.                          |
|------------------------------------------|-------------|--------------|-----------------------------------|-------------------------------------------------------------|--------------------------------|
| ComFedL Huang et al. (2021)              | CO-ND       | SGD          | $\mathcal{O}(\epsilon^{-2})$      | $\mathcal{O}(\epsilon^{-4})$                                | $\mathcal{O}(\epsilon^{-2})$   |
| Local-SCGDM Gao et al. (2022)            | CO-ND       | Momentum SGD | $\mathcal{O}(1)$                  | $\mathcal{O}(\epsilon^{-2})$                                | $\mathcal{O}(\epsilon^{-1.5})$ |
| FCSG <sup>†</sup> Wu et al. (2024)       | CO-ND       | SGD          | $\mathcal{O}(\epsilon^{-1})$      | $\mathcal{O}(K^{-1}\epsilon^{-3})$                          | $\mathcal{O}(\epsilon^{-1.5})$ |
| Acc-FCSG-M <sup>†</sup> Wu et al. (2024) | CO-ND       | VR           | $\mathcal{O}(\epsilon^{-1})$      | $\mathcal{O}(K^{-1}\epsilon^{-2.5})$                        | $\mathcal{O}(\epsilon^{-1})$   |
| FedNest Tarzanagh et al. (2022)          | Bilevel     | VR           | $\mathcal{O}(1)$                  | $\mathcal{O}(\epsilon^{-2})$                                | $\mathcal{O}(\epsilon^{-2})$   |
| FedBiOAcc Li et al. (2024)               | Bilevel     | VR           | $\mathcal{O}(1)$                  | $\mathcal{O}(K^{-1}\epsilon^{-1.5})$                        | $\mathcal{O}(\epsilon^{-1})$   |
| FedMBO Huang et al. (2023)               | Bilevel     | SGD          | $\mathcal{O}(\ln(\epsilon^{-1}))$ | $\mathcal{O}(K^{-1}\epsilon^{-2})$                          | $\mathcal{O}(\epsilon^{-2})$   |
| SimFBO Yang et al. (2024)                | Bilevel     | SGD          | $\mathcal{O}(1)$                  | $\mathcal{O}(K^{-1}\epsilon^{-2})$                          | $\mathcal{O}(\epsilon^{-1})$   |
| Fed-DR-SCGD <sup>‡</sup> Gao (2024)      | Multi-CO    | VR           | $\mathcal{O}(1)$                  | $\mathcal{O}(K^{-1}\epsilon^{-1.5})$                        | $\mathcal{O}(\epsilon^{-1})$   |
| GCIVR* Haddadpour et al. (2022)          | CO + Non-CO | VR           | $\sqrt{m}$ (I), $m$ (O)           | $\mathcal{O}(\sqrt{m}\epsilon^{-1} \wedge \epsilon^{-1.5})$ | $\mathcal{O}(\epsilon^{-1})$   |
| FedDRO (Ours)                            | CO + Non-CO | SGD          | $\mathcal{O}(1)$                  | $\mathcal{O}(K^{-1}\epsilon^{-2})$                          | $\mathcal{O}(\epsilon^{-1.5})$ |
| DS-FedDRO (Ours)                         | CO + Non-CO | SGD          | $\mathcal{O}(1)$                  | $\mathcal{O}(K^{-1}\epsilon^{-2})$                          | $\mathcal{O}(\epsilon^{-1})$   |

when  $D_*(\mathbf{p}, \mathbf{1}/m)$  is the  $\chi^2$ -Divergence, i.e., we have  $D_*(\mathbf{p}, \mathbf{1}/m) = D_{\chi^2}(\mathbf{p}, \mathbf{1}/m)$  with  $D_{\chi^2}(\mathbf{p}, \mathbf{1}/m) := m/2 \sum_{i=1}^m (p_i - 1/m)^2$ . For this case, an equivalent reformulation of (3) is

$$\min_{x \in \mathbb{R}^d} \frac{-1}{2\lambda m} \sum_{i=1}^m (\ell(x; \zeta_i))^2 + \frac{1}{2\lambda} \left( \frac{1}{m} \sum_{i=1}^m \ell(x; \zeta_i) \right)^2 \quad (5)$$

with  $g(x) = 1/m \sum_{i=1}^m \ell(x; \zeta_i)$ ,  $f(g(x)) = g(x)^2/2\lambda$  and  $h(x) = -\frac{1}{2\lambda m} \sum_{i=1}^m (\ell(x; \zeta_i))^2$ .

Both (4) and (5) can be restated in the FL setting of (2).

In addition to DRO, CO is used to model a variety of problems. Here, we highlight two representative examples: portfolio optimization Shapiro et al. (2021) and hyperparameter tuning Franceschi et al. (2018).

**Portfolio optimization.** In finance, portfolio optimization often involves balancing expected return and risk Shapiro et al. (2021). A classical formulation involves minimizing  $\min_{x \in \mathcal{X}} -\mathbb{E}[R(x)] + \lambda \text{Var}(R(x))$ . This formulation is widely used in mean-variance portfolio selection and other risk-aware financial optimization problems. Note that here the inner function  $g(x) = R(x)$  denotes the return of a portfolio with weights  $x$  and the outer function  $f(\cdot) = -\mathbb{E}[\cdot] + \text{Var}(\cdot)$  captures statistical properties of the portfolio return while encoding the risk-return trade-off.

**Hyperparameter tuning.** Many meta-learning Finn et al. (2017) as well as hyperparameter optimization problems Franceschi et al. (2018) can be expressed in CO form as  $\min_{\lambda \in \Lambda} L_{\text{val}}(g(\lambda))$ , where the inner function  $g(\lambda) = \arg \min_w L_{\text{train}}(w, \lambda)$  corresponds to the optimal model parameters obtained from a training problem, while the outer function  $f(\cdot) = L_{\text{val}}(\cdot)$  evaluates the validation performance. Such formulations arise in hyperparameter tuning, neural architecture search, and dataset reweighting, where the validation loss depends implicitly on the solution of a lower-level training problem.

**Related work.** Please see Table 1 for a comparison of current approaches to solve CO problems in distributed settings. For a detailed review of centralized and federated non-convex CO and DRO problems, please see Appendix A. Here, we point out some drawbacks of the current approaches to solving federated CO problems:

- Do not guarantee linear speedup with the number of clients Huang et al. (2021); Haddadpour et al. (2022); Tarzanagh et al. (2022); Gao et al. (2022); Wu et al. (2024).
- Utilize complicated multi-loop algorithms with momentum or VR-based updates Tarzanagh et al. (2022) that sometime require computation of large batch size gradients Haddadpour et al. (2022) to guarantee convergence.
- Rely on expensive matrix (or vector) projections, restrictive assumptions, and sharing of additional sequences Gao (2024); Yang et al. (2024).

- Recently developed bilevel algorithms although in theory can be used to solve CO problems Tarzanagh et al. (2022); Li et al. (2024); Huang et al. (2023); Yang et al. (2024), however, since the algorithms are designed for bilevel problems they often have complicated structure, suffer from worse performance, and require sharing of additional parameters.

- Consider a restricted setting where the compositional objective is not distributed among nodes Huang et al. (2021); Gao et al. (2022); Wu et al. (2024).

Our work addresses all these issues and develops, FedDRO and DS-FedDRO, the first *simple* SGD-based FL algorithms to tackle CO problems with the distributed compositional objective.

### 3 Preliminaries

This section introduces the assumptions, definitions, and preliminary lemmas.

**Definition 3.1** (Lipschitzness). For all  $x_1, x_2 \in \mathbb{R}^d$ , a differentiable function  $\Phi : \mathbb{R}^d \rightarrow \mathbb{R}$  is: Lipschitz smooth if  $\|\nabla\Phi(x_1) - \nabla\Phi(x_2)\| \leq L_\Phi\|x_1 - x_2\|$  for some  $L_\Phi > 0$ ; Lipschitz if  $\|\Phi(x_1) - \Phi(x_2)\| \leq B_\Phi\|x_1 - x_2\|$  for some  $B_\Phi > 0$  and; Mean-Squared Lipschitz if  $\mathbb{E}_\xi\|\Phi(x_1; \xi) - \Phi(x_2; \xi)\|^2 \leq B_\Phi^2\|x_1 - x_2\|^2$  for some  $B_\Phi > 0$ .

We make the following assumptions on the local and global functions in the problem (2).

**Assumption 3.2** (Lipschitzness). The following holds

1. The functions  $f(\cdot)$ ,  $h_k(\cdot)$ ,  $g_k(\cdot)$  for all  $k \in [K]$  are differentiable and Lipschitz-smooth with constants  $L_f, L_h, L_g > 0$ , respectively.
2. The function  $f(\cdot)$  and  $h_k(\cdot)$  are Lipschitz with constants  $B_f > 0$  and  $B_h > 0$ , respectively, and  $g_k(\cdot)$  is mean-squared Lipschitz for all  $k \in [K]$  with constant  $B_g > 0$ .

**Assumption 3.3** (Unbiased gradient and bounded variance). The stochastic gradients and function evaluations of the local functions satisfy

$$\begin{aligned}\mathbb{E}_{\xi_k}[\nabla h_k(x; \xi_k)] &= \nabla h_k(x), \mathbb{E}_{\zeta_k}[\nabla g_k(x; \zeta_k)] = \nabla g_k(x), \\ \mathbb{E}_{\zeta_k}[g_k(x; \zeta_k)] &= g_k(x), \mathbb{E}_{\zeta_k}[\nabla g_k(x; \zeta_k) \nabla f(y)] = \nabla g_k(x) \nabla f(y), \\ \mathbb{E}_{\xi_k}\|\nabla h_k(x; \xi_k) - \nabla h_k(x)\|^2 &\leq \sigma_h^2, \mathbb{E}_{\zeta_k}\|\nabla g_k(x; \zeta_k) - \nabla g_k(x)\|^2 \leq \sigma_g^2, \mathbb{E}_{\zeta_k}\|g_k(x; \zeta_k) - g_k(x)\|^2 \leq \sigma_g^2,\end{aligned}$$

for some  $\sigma_h, \sigma_g > 0$  and for all  $x \in \mathbb{R}^d$  and  $k \in [K]$ .

**Assumption 3.4** (Bounded gradient heterogeneity). The heterogeneity of  $h_k(\cdot)$  and  $g_k(\cdot)$  is characterized as

$$\sup_{x \in \mathbb{R}^d} \|\nabla h_k(x) - \nabla h(x)\|^2 \leq \Delta_h^2 \text{ and } \sup_{x \in \mathbb{R}^d} \|\nabla g_k(x) - \nabla g(x)\|^2 \leq \Delta_g^2,$$

for some  $\Delta_h, \Delta_g > 0$  for all  $k \in [K]$ .

The above assumptions are standard for non-convex CO problems. Specifically, Assumption 3.2 is required to establish Lipschitz smoothness of the  $\Phi(\cdot)$  (see Lemma 3.5) and is standard in the analyses of CO problems Wang et al. (2017); Chen et al. (2021). Assumption 3.3 captures the effect of stochasticity in the gradient/function evaluations, while Assumption 3.4 characterizes the data heterogeneity among clients. This assumption is standard in FL, capturing non-IID client data while ruling out arbitrarily divergent local objectives Khanduri et al. (2021); Karimireddy et al. (2019). We would like to point out that in the assumption  $\mathbb{E}_{\zeta_k}[\nabla g_k(x; \zeta_k) \nabla f(y)] = \nabla g_k(x) \nabla f(y)$  (see Assumption 3.3),  $y$  may be correlated with the sample  $\zeta_k$ , and therefore, the unbiasedness assumption may not strictly hold. This assumption is made only for simplicity, similar to Chen et al. (2021), and can be easily avoided by drawing an independent sample instead of  $\zeta_k$  so that the sample used is independent of  $y$ . Importantly, this modification does not affect the algorithm or the theoretical guarantees presented in this work. We note that all these assumptions are standard and have been utilized in the past to establish the convergence of many FL algorithms Yu et al. (2019a); Karimireddy et al. (2019); Zhang et al. (2021); Woodworth et al. (2020); Yang et al. (2022; 2021).

**Lemma 3.5** (Lipschitzness of  $\Phi$ ). *Under Assumption 3.2 the compositional function,  $\Phi(\cdot)$ , defined in (2) is Lipschitz smooth with constant:  $L_\Phi := L_h + B_f L_g + B_g^2 L_f > 0$ .*

Lemma 3.5 establishes Lipschitz smoothness of the compositional function  $\Phi(\cdot)$ . In general,  $\Phi(\cdot)$  is a non-convex, and therefore, we cannot expect to globally solve (2). We instead rely on finding approximate stationary points of  $\Phi(\cdot)$ .

**Definition 3.6** ( $\epsilon$ -stationary point). A point  $x$  generated by an algorithm is an  $\epsilon$ -stationary point of  $\Phi(\cdot)$  if  $\mathbb{E}\|\nabla\Phi(x)\|^2 \leq \epsilon$ , where the expectation is taken w.r.t. the stochasticity of the algorithm.

**Definition 3.7** (Sample and communication complexity). The sample complexity is the total (stochastic) gradient and function evaluations required to achieve an  $\epsilon$ -stationary solution. Similarly, communication complexity is the total number of communication rounds between the clients and the server required to achieve an  $\epsilon$ -stationary solution.

## 4 Federated non-convex CO algorithms

In this section, we for the first time establish the incapability of vanilla FedAvg to solve the distributed CO.

### 4.1 FedAvg fails to solve the federated CO problem

We show that vanilla FedAvg is not suitable for solving federated CO problems of form (2). To establish this, we consider a simple deterministic setting with  $h(x) = 0$ . For this setting, the local gradients of  $\Phi(\cdot)$  are estimated using

$$\nabla\Phi_k(x) = \nabla g_k(x_k)\nabla f(y_k) \quad (6)$$

where sequence  $y_k$  represents the local estimate of the inner function  $g(x)$ . To solve the above problem in a federated setup, we consider two candidate versions of FedAvg described in Case I and II of Algorithm 1. Similar to vanilla FedAvg, each agent performs multiple local updates within each communication round (Step 5 of Algorithm 1). Since  $g(x) := 1/k \sum_{k=1}^k g_k(x)$  with each agent  $k \in [K]$  having access to only the local copy  $g_k(\cdot)$ , estimating  $g(\cdot)$  locally within each communication round is not feasible. Therefore, each agent utilizes  $y_k = g_k(x_k)$  as the local estimate of the inner function  $g(\cdot)$ . For communication, we consider two protocols. In the first setting, after  $I$  local updates, in each communication round the agents share the locally updated parameters with the server and receive the aggregated parameter from the server (Case I in Step 7). In the second setting, in addition to the locally updated parameters the agents also share their local function evaluations  $y_k^t = g_k(x_k^t)$  with the server and receive the aggregated embedding  $\bar{y}^t$  from the server. This step is utilized to improve the local estimates of  $g(\cdot)$  (Case II in Step 7). The algorithm executes for  $\lceil T/I \rceil$  communication rounds.

---

#### Algorithm 1 Vanilla FedAvg for non-convex CO

---

```

1: Input: Parameters:  $\{\eta^t\}_{t=0}^{T-1}, I$ 
2: Initialize:  $x_k^0 = \bar{x}^0, y_k^0 = \bar{y}^0$ 
3: for  $t = 0$  to  $T - 1$  do
4:   for  $k = 1$  to  $K$  do
5:     Update:  $\begin{cases} \text{Compute } \nabla\Phi_k(x_k^t) \text{ using (6)} \\ \text{Local update: } x_k^{t+1} = x_k^t - \eta^t \nabla\Phi_k(x_k^t) \\ \text{Local composite function estimation: } y_k^{t+1} = g_k(x_k^{t+1}) \end{cases}$ 
6:   if  $t + 1 \bmod I = 0$  then
7:      $\begin{cases} \text{[Case 1] Share: } \begin{cases} \text{Global update: } x_k^{t+1} = \bar{x}^{t+1} \\ \text{Global update: } x_k^{t+1} = \bar{x}^{t+1} \end{cases} \\ \text{[Case 2] Share: } \begin{cases} \text{Local composite function estimation: } y_k^{t+1} = g_k(\bar{x}^{t+1}) \\ \text{Global composite function estimation: } y_k^{t+1} = \bar{y}^{t+1} \end{cases} \end{cases}$ 
8:   end if
9:   end for
10: end for

```

---

In the following, we show that Algorithm 1 for both Cases I and II cannot solve the federated CO problem presented in (2) even in the simple deterministic setting with  $h(x) = 0$ .

**Theorem 4.1** (Vanilla FedAvg: Non-convergence for CO). *There exist functions  $f(\cdot)$  and  $g_k(\cdot)$  for  $k \in [K]$  satisfying Assumptions 3.2, 3.3, and 3.4, and an initialization strategy such that for a fixed number of local updates  $I > 1$ , and for any  $0 < \eta^t < C_\eta$  for  $t \in \{0, 1, \dots, T-1\}$  where  $C_\eta > 0$  is a constant, the iterates generated by Algorithm 1 under both Cases I and II do not converge to the stationary point of  $\Phi(\cdot)$ , where  $\Phi(\cdot)$  is defined in (2) with  $h(x) = 0$ .*

Theorem 4.1 establishes that vanilla FedAvg is not suitable for solving federated CO problems. An important consequence of the above result is that under the set of Assumptions 3.2-3.4 the algorithms proposed in Huang et al. (2023); Gao (2024); Yang et al. (2024); Li et al. (2024) for solving federated CO (or bilevel) problems would fail to converge. We note that Theorem 4.1 highlights a fundamental mechanism that causes vanilla FedAvg to fail when applied to federated CO problems. The issue arises from the interaction of two effects: (i) the *inherent bias* in (stochastic) gradient estimators for compositional objectives because of the distributed nature of the objective, and (ii) *client drift* induced by performing multiple local updates. In the compositional setting, local updates propagate biased gradient estimates, and when the inner compositional objective is not synchronized at every communication round, this bias accumulates across rounds and cannot be controlled for any number of local steps  $I > 1$ . Specifically, Theorem 4.1 isolates this phenomenon and illustrates how such bias amplification prevents convergence. Moreover, regarding commonly used remedies, reducing the number of local steps or using techniques such as momentum, control variates, or variance reduction can mitigate client drift upto some extent, but do not eliminate the structural bias arising from the distributed inner compositional objective. As a result, the issue will still persist. This naturally leads to the question of how can we modify FedAvg such that it can efficiently solve CO problems of the form (2). Clearly, Theorem 4.1 suggests that sharing  $y_k$ 's in each iteration is required to ensure convergence of FedAvg since sharing the iterates  $y_k$ 's only intermittently leads to non-convergence of FedAvg. To this end, we propose to modify the FedAvg algorithm as presented in Algorithm 1 by sharing  $y_k$  in each iteration  $t \in \{0, 1, \dots, T-1\}$ . The next result shows that the modified FedAvg resolves the non-convergence issue.

**Theorem 4.2** (Modified FedAvg: Convergence for CO). *Suppose we modify Algorithm 1 such that  $y_k^t = \bar{y}^t$  is updated at each iteration  $t \in \{0, 1, \dots, T-1\}$  instead of  $[t+1 \bmod I]$  iterations as in current version of Algorithm 1. Then if functions  $f(\cdot)$  and  $g_k(x)$  for  $k \in [K]$  satisfy Assumptions 3.2, 3.3, and 3.4 such that for a fixed number of local updates  $1 \leq I \leq \mathcal{O}(T^{1/4})$ , there exists a choice of  $\eta^t > 0$  for  $t \in \{0, 1, \dots, T-1\}$  such that the iterates generated by (modified) Algorithm 1 converge to the stationary point of  $\Phi(\cdot)$ , where  $\Phi(\cdot)$  is defined in (2) with  $h(x) = 0$ .*

## 4.2 A baseline federated non-convex CO algorithm: FedDRO

In this section, we propose a novel distributed non-convex CO algorithm, FedDRO, for solving (2). As demonstrated in Section 4.1, this problem is particularly challenging because of the compositional structure and heterogeneity of the local objectives. Motivated by Theorem 4.2 above, in this work we develop a novel approach where we utilize the structure of the CO problem to develop efficient FL algorithms for solving (2). Specifically, as also demonstrated in Section 2.1 we utilize the fact that the embedding  $g(\cdot)$  is low-dimensional (e.g.,  $d_g = 1$ ), especially for DRO problems. This implies that sharing of  $g(\cdot)$  will be relatively cheap in contrast to the high-dimensional model parameters of size  $d$  which can be very large and take values in millions or even in billions for modern overparameterized neural networks Allen-Zhu et al. (2019). Therefore, like FedAvg, we share the model parameters intermittently after multiple local updates while sharing the low-dimensional embedding of  $g(\cdot)$  frequently to handle the compositional objective. Please see Section 5 for an algorithm that avoids communicating this embedding, at the cost of an additional assumption and the use of a two-sided learning-rate scheme.

Moreover, to solve the CO problems for DRO the developed algorithms generally utilize batch sizes (for gradient/function evaluation) that are dependent on the solution accuracy Huang et al. (2021); Haddadpour et al. (2022). However, this is not feasible in most practical settings. In addition, to control the bias and to circumvent the need to compute large batch gradients, we utilize a momentum-based estimator to learn the inner function (see (8)) Chen et al. (2021). This construction allows us to develop FedAvg-type algorithms for solving non-convex CO problems wherein the local updates resemble the standard SGD updates.

The detailed steps of FedDRO are listed in Algorithm 2. During the local updates each client  $k \in [K]$  updates its local model  $x_k^t \forall t \in [T]$  using the local estimate of the stochastic gradients in Step 6. The stochastic gradient estimates for each client  $k \in [K]$  are denoted by  $\nabla\Phi_k(x_k^t; \xi_k)$  and are evaluated using the chain rule of differentiation as

$$\nabla\Phi_k(x_k^t; \xi_k^t) = \nabla h_k(x_k^t; \xi_k^t) + \nabla g_k(x_k^t; \zeta_k^t) \nabla f(\bar{y}^t) \quad (7)$$

where  $\xi_k^t = \{\xi_k^t, \zeta_k^t\}$  represents the stochasticity of the gradient estimate. The variable  $\bar{y}^t$  is designed to estimate the inner function  $1/K \sum_{k=1}^K g_k(x)$  in (2). A standard approach to estimate  $g_k(x)$  locally for each  $k \in [K]$  is to utilize a large batch such that the gradient bias from the inner function estimate can be controlled Guo et al. (2022); Huang et al. (2021); Haddadpour et al. (2022). In contrast, we adopt a momentum-based estimate of  $g_k(\cdot)$  at each client  $k \in [K]$  that leads to a small bias asymptotically Chen et al. (2021). We note that the estimator utilizes a hybrid estimator that combines a SARAH Nguyen et al. (2017) and SGD Ghadimi & Lan (2013) estimate for the function values rather than the gradients Cutkosky & Orabona (2019). Specifically, individual  $y_k^t$ 's are estimated in Step 6 as

$$y_k^t = (1 - \beta^t) \left( y_k^{t-1} - g_k(x_k^{t-1}; \zeta_k^t) \right) + g_k(x_k^t; \zeta_k^t). \quad (8)$$

for all  $k \in [K]$  and where  $\beta^t \in (0, 1)$  is the momentum parameter. Motivated by the discussion in Section 4.1, the low-dimensional parameters  $y_k^t \in \mathbb{R}^{d_g}$  are shared with the server after the  $y_k^t$  update. The model parameters are then updated using the SG evaluated using (7). Finally, after  $I$  local updates, the model parameters are aggregated on the server and shared with the clients after aggregation in Step 8. Next, we state the convergence guarantees.

**Convergence of FedDRO.** In the next theorem, we state the convergence of FedDRO.

**Theorem 4.3** (Convergence of FedDRO). *For Algorithm 2, choosing the step-size  $\eta^t = \eta = \mathcal{O}(\sqrt{K/T})$ , the momentum parameter  $\beta = 4B_g^4 L_f^2 \eta$  for all  $t \in \{0, 1, \dots, T-1\}$ , and  $I = \mathcal{O}(T^{1/4}/K^{3/4})$ . For  $T \geq T_{th}$  where  $T_{th}$  is defined in Appendix F, then under Assumptions 3.2, 3.3 and 3.4 for  $\bar{x}^{a(T)}$  chosen according to Algorithm 2, we have*

$$\mathbb{E} \|\nabla\Phi(\bar{x}^{a(T)})\|^2 \leq \mathcal{O}\left(\frac{\mathcal{C}_{Sync}}{\sqrt{KT}}\right) + \mathcal{O}\left(\frac{\mathcal{C}_{Drift}}{\sqrt{KT}}\right),$$

where constant  $\mathcal{C}_{Sync}$  depends on initialization and  $\mathcal{C}_{Drift}$  depends on the stochastic variance and data heterogeneity (See Appendix F).

---

#### Algorithm 2 FedDRO

---

```

1: Input: Parameters:  $\{\beta^t\}_{t=0}^{T-1}, \{\eta^t\}_{t=0}^{T-1}, I$ 
2: Initialize:  $x_k^{-1} = x_k^0 = \bar{x}^0, y_k^0 = \bar{y}^0$ 
3: for  $t = 0$  to  $T - 1$  do
4:   for  $k = 1$  to  $K$  do
5:     Local Update and Sharing:
6:     Update:  $\begin{cases} \text{Compute } \nabla\Phi_k(x_k^t; \xi_k^t) \text{ using (7)} \\ \text{Local update: } x_k^{t+1} = x_k^t - \eta^t \nabla\Phi_k(x_k^t; \xi_k^t) \\ \text{Local composite function estimation: Compute } y_k^{t+1} \text{ using (8); share with server} \\ \text{Global composite function estimation: Receive } \bar{y}^{t+1} \text{ from server; update } y_k^{t+1} = \bar{y}^{t+1} \end{cases}$ 
7:   if  $t + 1 \bmod I = 0$  then
8:     Aggregate:  $\begin{cases} \text{Global update: } x_k^{t+1} = \bar{x}^{t+1} \end{cases}$ 
9:   end if
10:  end for
11: end for
12: Return:  $\bar{x}^{a(T)}$  where  $a(T) \sim \mathcal{U}\{1, \dots, T\}$ .

```

---



We note that the condition on  $T \geq T_{\text{th}}$  is required only for theoretical purposes. Specifically, it ensures that the step-size  $\eta = \mathcal{O}(\sqrt{K/T})$  is upper-bounded. A similar requirement has also been posed in Yu et al. (2019a;b); Khanduri et al. (2021) in the past. Theorem 4.3 captures the effect of heterogeneity, stochastic variance, and the initialization on the performance of FedDRO. Theorem 4.3 also states that there exists a choice of the number of local updates that guarantee that FedDRO achieves the same convergence performance as a standard FedAvg Karimireddy et al. (2019); Woodworth et al. (2020); Yu et al. (2019a); Khanduri et al. (2021) for solving the non-CO problems. Next, we characterize the sample and communication complexities of FedDRO.

**Corollary 4.4** (Computation and communication). *Under the setting of Theorem 4.3 the following holds for FedDRO*

- (i) The **sample complexity** is  $\mathcal{O}(\epsilon^{-2})$ . This implies that each client requires  $\mathcal{O}(K^{-1}\epsilon^{-2})$  samples to reach an  $\epsilon$ -stationary point achieving linear speed-up.
- (ii) The **communication complexity** of is  $\mathcal{O}(\epsilon^{-3/2})$ .

*Remark 4.5* (Performance with dimension of  $g(\cdot)$ ). The sample and communication complexities guaranteed by Corollary 4.4 match those of the standard FedAvg algorithm Yu et al. (2019b) for stochastic non-convex non-CO problems and improve upon the guarantees of existing federated CO algorithms Huang et al. (2021); Gao et al. (2022); Guo et al. (2022). In addition to the  $\mathcal{O}(\epsilon^{-3/2})$  communication complexity associated with sharing high-dimensional model parameters, FedDRO also communicates  $\mathcal{O}(\epsilon^{-2}K^{-1}d_g)$  typically low-dimensional embeddings (often scalar quantities, as illustrated in Section 2.1), where  $d_g$  denotes the dimension of  $g(\cdot)$ . Consequently, the total number of real-valued quantities transmitted by each client during the execution of FedDRO is  $\mathcal{O}(\epsilon^{-3/2}d + \epsilon^{-2}K^{-1}d_g)$ , where  $d$  denotes the model dimension. Observe that if  $d \geq \epsilon^{-1/2}K^{-1}d_g$ , the overall complexity is still dominated by the first term, yielding the same  $\mathcal{O}(\epsilon^{-3/2})$  rate. However, if  $d_g \geq \sqrt{\epsilon}Kd$ , the second term becomes dominant, and the communication complexity degrades to  $\mathcal{O}(\epsilon^{-2})$ , which matches the classical distributed SGD guarantee. Nevertheless, we note that for many problems of practical interest, including DRO Haddadpour et al. (2022), portfolio optimization Shapiro et al. (2021), and phase retrieval Duchi & Ruan (2019), the function  $g(\cdot)$  is typically low-dimensional.

However, to make FedDRO fully federated it is desirable to develop an algorithm that can circumvent the need to communicate the sequences  $y_k^t$  at each time instant. Next, we tackle this challenge and develop a novel two-sided learning rate algorithm DS-FedDRO.

---

### Algorithm 3 DS-FedDRO

---

```

1: Input: Parameters:  $\{\beta^t\}_{t=0}^{T-1}, \{\eta^t\}_{t=0}^{T-1}, I, \gamma_x, \gamma_y$ 
2: Initialize:  $x_k^{-1} = x_k^0 = x^\tau, y_k^0 = y^\tau$  with  $\tau = 0, \forall k \in [K]$ 
3: for  $t = 0$  to  $T - 1$  do
4:   for  $k = 1$  to  $K$  do
5:     Update:  $\begin{cases} \text{Compute } \nabla \Phi_k(x_k^t; \xi_k^t) \text{ using (7)} \\ \text{Local update: } x_k^{t+1} = x_k^t - \eta^t \nabla \Phi_k(x_k^t; \xi_k^t) \\ \text{Local composite function estimation: } y_k^{t+1} = (1 - \beta^t)y_k^t + \beta^t g_k(x_k^{t+1}; \zeta_k^{t+1}) \end{cases}$ 
6:   if  $t + 1 \bmod I = 0$  then
7:     Share:  $\begin{cases} \text{Global update: } x^{\tau+1} = x^\tau - \frac{\gamma_x^\tau}{K} \sum_{k=1}^K (x^\tau - x_k^{t+1}) \\ x_k^{t+1} = x^{\tau+1}, \forall k \in [K] \\ \text{Global composite function estimation: } y^{\tau+1} = y^\tau - \frac{\gamma_y^\tau}{K} \sum_{k=1}^K (y^\tau - y_k^{t+1}) \\ y_k^{t+1} = y^{\tau+1}, \forall k \in [K] \end{cases}$ 
8:      $\tau = \tau + 1$ 
9:   end if
10:  end for
11: end for
12: Return:  $\bar{x}^{a(T)}$  where  $a(T) \sim \mathcal{U}\{1, \dots, T\}$ .
```

---

## 5 Federated non-convex CO with two-sided learning rates: DS-FedDRO

In this section, we propose a novel algorithm called DS-FedDRO (FedDRO with double-sided learning rates) that relies on the two-sided learning rate utilized in classical FL algorithms to improve both the experimental and the theoretical performance Yang et al. (2021); Reddi et al. (2020). Importantly, we show that, under the additional Assumption 5.1, DS-FedDRO completely avoids the communication of sequence  $y_k^{t+1}$  as required by FedDRO while at the same time achieving improved communication complexity. The steps of DS-FedDRO are listed in Algorithm 3. Let us point out a few key differences compared to FedDRO. First, note in Step 7 that instead of performing simple aggregation, the algorithm relies on a two-sided learning rate update rule for both the  $x$ - and the  $y$ -update. Second, note that the two-sided learning update rule also allows us to update the sequence  $y$  utilizing only a single stochastic gradient computation in Step 5. In contrast, FedDRO required two stochastic gradient computations to update  $y$ . In effect, DS-FedDRO, not only reduces the communication complexity but also improves the per iteration computation complexity over FedDRO. In the following, we present the convergence guarantees of DS-FedDRO and contrast them to those achieved by FedDRO.

### 5.1 Main results: Convergence of DS-FedDRO

For the theoretical results of this section, we utilize a different notion of heterogeneity compared to Assumption 3.4 presented earlier.

**Assumption 5.1** (Bounded functional heterogeneity). The heterogeneity of  $g_k(\cdot)$  is characterized as  $\sup_{x \in R^d} \|g_k(x) - g(x)\|^2 \leq \Delta_g^2$ , for some  $\Delta_g > 0$  and for all  $k \in [K]$ .

Assumption 5.1 is a weaker version of (Gao, 2024, Assumption 3.3), where bounded heterogeneity is imposed directly on the stochastic objectives. It is also closely related to assumptions used in bilevel optimization with quadratic lower-level objectives (Huang et al., 2023; Yang et al., 2024, Assumption 5). Although restrictive, this type of condition is common in the optimization literature and is motivated by the bounded gradient heterogeneity assumptions widely used in federated learning (Yu et al., 2019b; Karimireddy et al., 2019; Zhang et al., 2021). We now state the main result.

**Theorem 5.2.** For Algorithm 3, choosing the local step-sizes  $\eta^t = \eta = \mathcal{O}(\sqrt{1/TI})$  and the momentum parameter  $\beta^t = \beta = c_\beta \eta$  for all  $t \in \{0, 1, \dots, T-1\}$ . Choosing the server step-sizes  $\gamma_x = \mathcal{O}(\sqrt{K/T})$ ,  $\gamma_y = c_{\gamma_y} \gamma_x$ , and  $I = \mathcal{O}(\sqrt{T/K})$ . Then under Assumptions 3.2, 3.3, 3.4, and 5.1 for  $\bar{x}^{a(T)}$  chosen according to Algorithm 3, we have

$$\mathbb{E} \|\nabla \Phi(\bar{x}^{a(T)})\|^2 \leq \mathcal{O}\left(\sqrt{\frac{\mathcal{C}_{Sync}}{KT}}\right) + \mathcal{O}\left(\frac{\mathcal{C}_{Drift}}{T}\right)$$

for some constants  $c_\beta$ ,  $c_{\gamma_y}$ ,  $\mathcal{C}_{Sync}$  and  $\mathcal{C}_{Drift}$ .

Next, we characterize the sample and communication complexity of DS-FedDRO.

**Corollary 5.3** (Computation and communication). Under the setting of Theorem 5.2 the following holds for DS-FedDRO

- (i) The **sample complexity** is  $\mathcal{O}(\epsilon^{-2})$ . This implies that each client requires  $\mathcal{O}(K^{-1}\epsilon^{-2})$  samples to reach an  $\epsilon$ -stationary point achieving linear speed-up.
- (ii) The **communication complexity** is  $\mathcal{O}(\epsilon^{-1})$ .

First, note that DS-FedDRO in addition to achieving linear speed-up also improves the communication performance compared to FedDRO. Moreover, it is important to note that the communication complexity of  $\mathcal{O}(\epsilon^{-1})$  matches the best-known communication complexity even for standard FL problems Zhang et al. (2021); Acar et al. (2020). Moreover, compared to federated CO algorithms Gao (2024); Haddadpour et al. (2022) and bilevel optimization algorithms Tarzanagh et al. (2022); Yang et al. (2024); Li et al. (2024); Huang et al. (2023) the update rules employed by DS-FedDRO (and FedDRO) are much simpler, computation efficient (does not require any projection) and require the sharing of fewer sequences, thereby, making DS-FedDRO efficient compared to such algorithms.

*Remark 5.4* (Comparison of DS-FedDRO to FedDRO). Although DS-FedDRO performs significantly better compared to FedDRO in terms of communication performance, there are some drawbacks of DS-FedDRO: (i) *Additional tuning parameters*. From a practical perspective, because of the addition of server-side learning rates for both  $x$ - and  $y$ - updates, DS-FedDRO requires more parameters to tune compared to FedDRO. (ii) *Additional assumption*. From a theoretical perspective, the improved performance of DS-FedDRO is made possible with additional Assumption 5.1 compared to FedDRO which did not require Assumption 5.1.

## 6 Experiments

In this section, we evaluate the performance of FedDRO and DS-FedDRO with both centralized and distributed baselines. Our goal is to 1) establish the superior performance of FedDRO and DS-FedDRO compared to popular federated DRO baselines, and 2) evaluate the performance of FedDRO and DS-FedDRO with different numbers of local updates to capture the effect of data heterogeneity. To evaluate the performance of FedDRO and DS-FedDRO, we focus on two tasks: classification with an imbalanced dataset and learning with fairness constraints. For the first task, we use CIFAR10-ST and CIFAIR-100-ST datasets Qi et al. (2020b) (unbalanced versions of CIFAR10 and CIFAR100 Krizhevsky et al. (2009)) for image classification, and the performance is measured by training and testing accuracy achieved by different algorithms. For the second task, we use the Adult dataset Dua & Graff (2017) for enforcing equality of opportunity (on protected

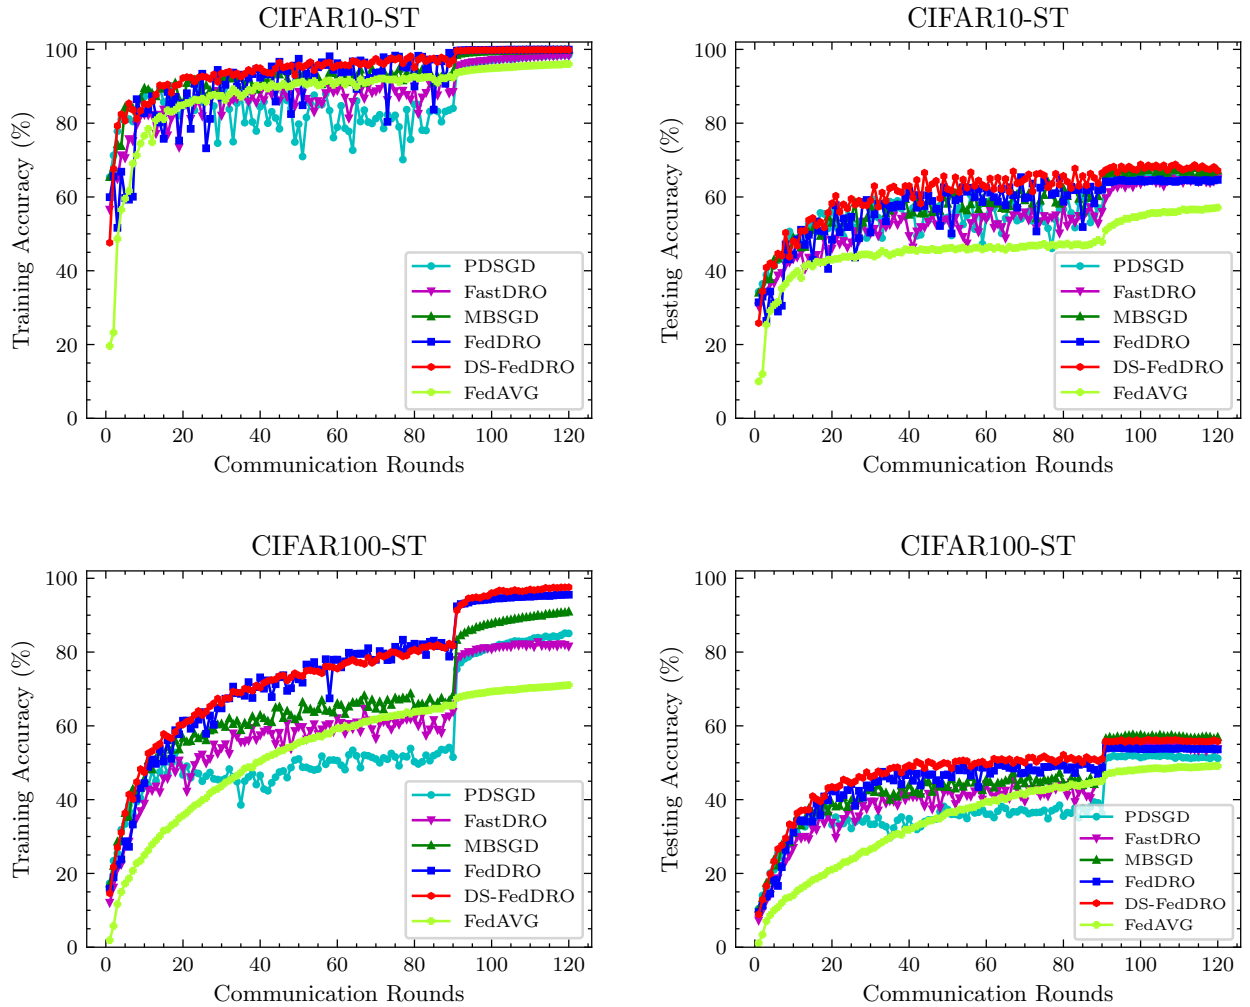

Figure 1: Performance comparison of various algorithms on CIFAR10-ST and CIFAR100-ST datasets.

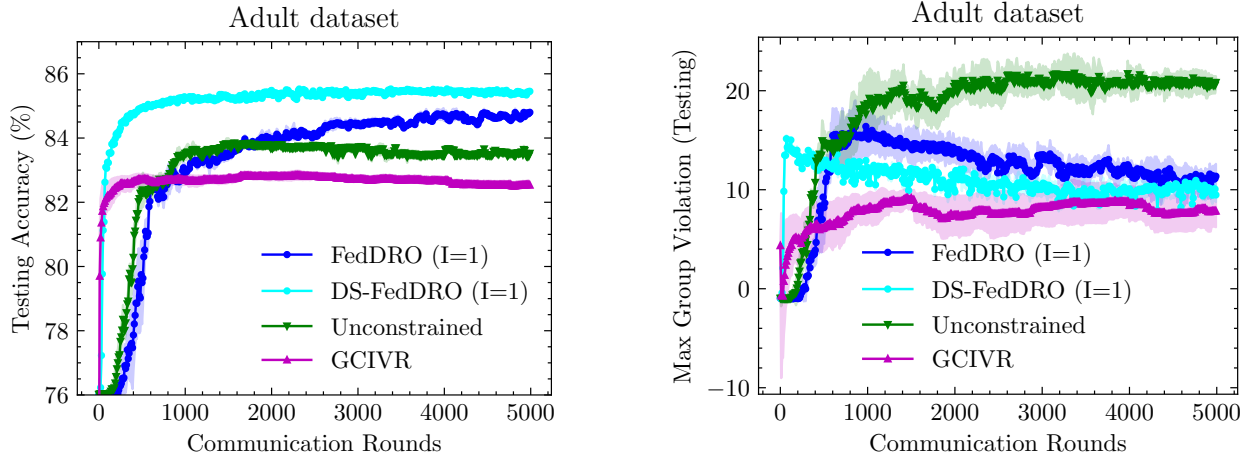

Figure 2: Comparison of FedDRO, DS-FedDRO, GCIVR, and the unconstrained baseline on Adult dataset.

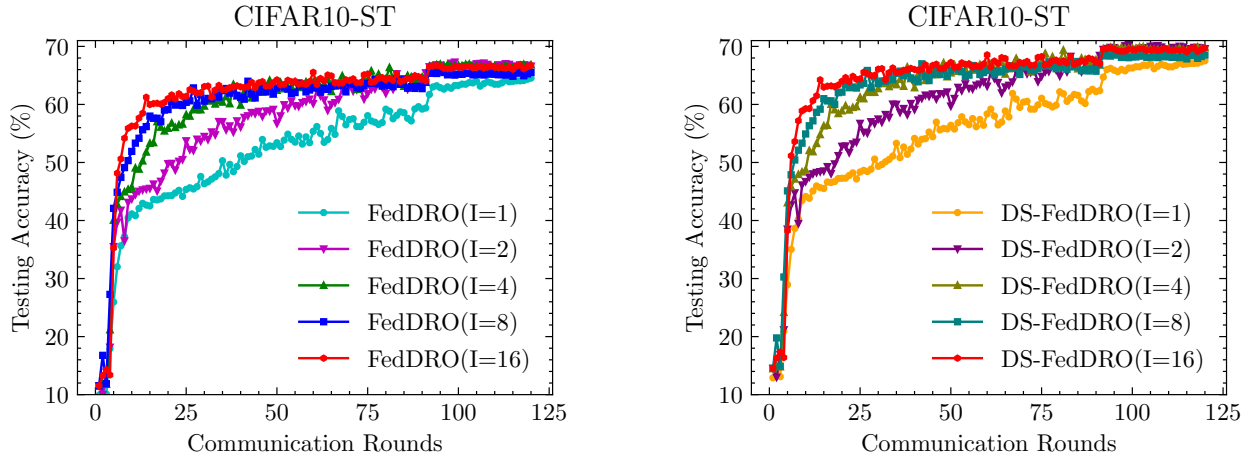Figure 3: FedDRO and DS-FedDRO on the CIFAR10-ST and CIFAR100-ST for different  $I$ .

classes) on tabular data classification Hardt et al. (2016). For this setting, the performance is evaluated by training/testing accuracy, and the constraint violations, which are measured by the gap between the true positive rate of the overall data and the protected groups Haddadpour et al. (2022). Please see Appendix B for further details and additional experiments.

**Baseline methods.** For the CIFAR10-ST and CIFAR100-ST datasets we compare FedDRO and DS-FedDRO with popular centralized and distributed baselines for classification with imbalanced data. The baselines adopted for comparison are a popular DRO method, FastDRO Levy et al. (2020), a primal-dual SGD approach to solve constrained problems with many constraints, PDSGD Xu (2020), classical FedAvg (see Algorithm 2 Case II) Yu et al. (2019b;a) and a popular baseline minibatch SGD, MBSGD, customized for CO Ghadimi & Lan (2013). For the adult dataset, we use GCIVR Haddadpour et al. (2022) as the baseline distributed model to compare with FedDRO and DS-FedDRO, since like these, it is the only algorithm that can deal with CO and non-CO objectives simultaneously. We also implement parallel SGD (serving as a proxy for FedAvg with a single local update). as a baseline that ignores the fairness constraints, referred to as unconstrained in the experiments.

**Implementation details.** We use 8 clients to model the distributed setting and split the (unbalanced) dataset equally for each client (for performance with 32 clients please refer to the Appendix). We use ResNet20 for classification tasks on CIFAR10-ST and CIFAR100-ST datasets. For a fair comparison with centralized baselines, we choose  $I = 1$  for FedDRO and implement a parallel version of the centralized algorithms where the overall gradient computation is  $K$  times larger for each algorithm. This is to make sure that the overall

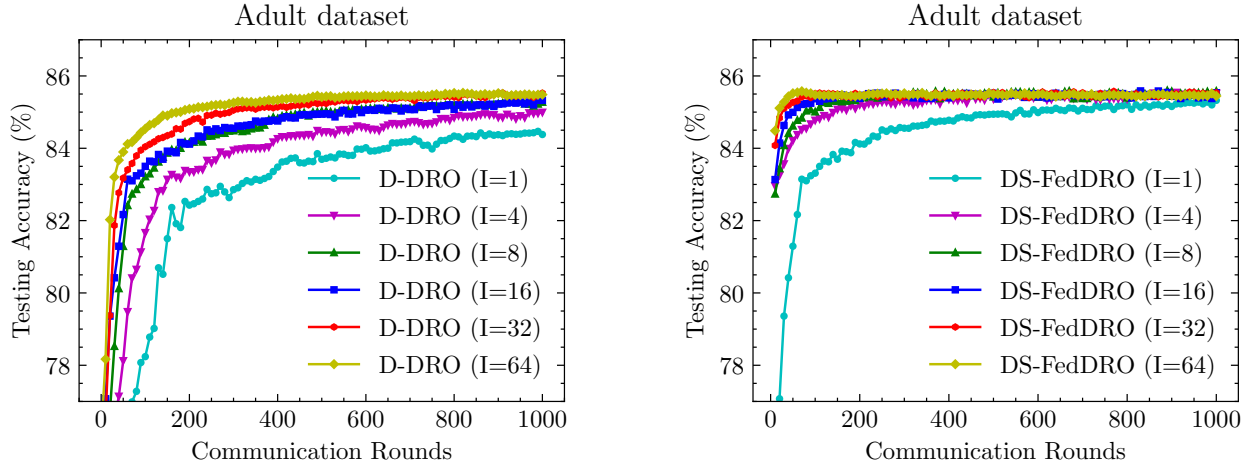Figure 4: Performance of FedDRO and DS-FedDRO on Adult dataset for different  $I$ .

gradient computations in each step are uniform across all algorithms. Performance with different values of  $I$  is evaluated separately. For each algorithm, we used a batch size of 16 per client, and the learning rates were tuned from the set  $\{0.001, 0.01, 0.05, 0.1\}$ , the learning rate was dropped to  $1/10^{\text{th}}$  after 90 communication rounds. As for the two-sided learning rates for DS-FedDRO we select 1.3 and 1.4 for the respective tasks. For fairness-constrained classification on the Adult dataset, we use a logistic regression model. For this experiment, we adopt the settings suggested in Haddadpour et al. (2022), for FedDRO and DS-FedDRO we keep the same setting as in the earlier task. Each experiment was repeated three times using different random seeds, and we report the mean and standard deviation of the results.

**Discussion.** In Figure 1, we evaluate the performance of FedDRO and DS-FedDRO against parallel implementations of centralized and distributed baselines on unbalanced CIFAR datasets. Both methods achieve higher training accuracy and comparable or better test accuracy relative to the baselines. Notably, DS-FedDRO slightly outperforms FedDRO, which highlights the benefit of employing two-sided learning rates at both the client and server levels. This design allows the server to more effectively aggregate and correct the updates received from heterogeneous clients, leading to improved optimization stability. In contrast, FedAvg performs significantly worse on these compositional objectives. This observation is consistent with our theoretical analysis of Section 4.1 showing that vanilla FedAvg fails to converge for federated CO problems because it does not properly account for the nested gradient structure. In Figure 2, we compare FedDRO and DS-FedDRO with the distributed baseline GCIVR on the Adult dataset. Both methods achieve higher test accuracy while maintaining comparable constraint violation performance as the number of communication rounds increases. These results demonstrate that our methods can effectively balance optimization accuracy and constraint satisfaction while maintaining communication efficiency.

Finally, in Figures 3 and 4, we examine the effect of the number of local updates,  $I$ , on the CIFAR10 and Adult datasets, respectively. As  $I$  increases, both FedDRO and DS-FedDRO initially exhibit improved performance due to reduced communication overhead and more effective utilization of local computation. However, beyond a certain point, the performance saturates. This phenomenon arises from client drift caused by data heterogeneity across clients: when too many local updates are performed, the local models deviate from the global objective, which limits the benefits of further local computation. In particular, moderate values of  $I$  provide the best trade-off between communication efficiency and optimization stability, whereas excessively large values of  $I$  lead to diminishing returns due to increased client drift. This empirical observation is consistent with our theoretical analysis (cf. Theorems 4.3 and 5.2), which shows that increasing the number of local updates accelerates optimization only up to a certain threshold, beyond which the effect of heterogeneity dominates and the improvement saturates.

## 7 Conclusion

This work establishes, for the first time, that vanilla FedAvg fails to solve CO problems in federated learning under standard assumptions. To overcome this limitation, we show that convergence of SGD-based FL algorithms for CO problems of the form (2) requires sharing additional, typically low-dimensional embeddings of the stochastic compositional objective. Building on this insight, we propose FedDRO, a federated CO algorithm that achieves linear speedup in the number of clients without large batch sizes. We further develop DS-FedDRO, which, under an additional assumption and a double-sided learning rate, eliminates the need for extra communication while attaining improved communication complexity.

## References

- Durmus Alp Emre Acar, Yue Zhao, Ramon Matas, Matthew Mattina, Paul Whatmough, and Venkatesh Saligrama. Federated learning based on dynamic regularization. In *International Conference on Learning Representations*, 2020.
- Ahmet Alacaoglu, Volkan Cevher, and Stephen J Wright. On the complexity of a practical primal-dual coordinate method. *arXiv preprint arXiv:2201.07684*, 2022.
- Zeyuan Allen-Zhu, Yuezhi Li, and Yingyu Liang. Learning and generalization in overparameterized neural networks, going beyond two layers. *Advances in neural information processing systems*, 32, 2019.
- Aharon Ben-Tal, Dick Den Hertog, Anja De Waegenaere, Bertrand Melenberg, and Gijs Rennen. Robust solutions of optimization problems affected by uncertain probabilities. *Management Science*, 59(2):341–357, 2013.
- Dimitris Bertsimas, Vishal Gupta, and Nathan Kallus. Data-driven robust optimization. *Mathematical Programming*, 167:235–292, 2018.
- MingCai Chen, Yu Zhao, Bing He, Zongbo Han, Bingzhe Wu, and Jianhua Yao. Learning with noisy labels over imbalanced subpopulations. *arXiv preprint arXiv:2211.08722*, 2022.
- Ruidi Chen and Ioannis C Paschalidis. A robust learning approach for regression models based on distributionally robust optimization. *Journal of Machine Learning Research*, 19(13), 2018.
- Tianyi Chen, Yuejiao Sun, and Wotao Yin. Solving stochastic compositional optimization is nearly as easy as solving stochastic optimization. *IEEE Transactions on Signal Processing*, 69:4937–4948, 2021.
- Ashok Cutkosky and Francesco Orabona. Momentum-based variance reduction in non-convex SGD. In *Advances in Neural Information Processing Systems 32*, pp. 15236–15245. Curran Associates, Inc., 2019.
- Dheeru Dua and Casey Graff. UCI machine learning repository, 2017. URL <http://archive.ics.uci.edu/ml>.
- John C Duchi and Feng Ruan. Solving (most) of a set of quadratic equalities: Composite optimization for robust phase retrieval. *Information and Inference: A Journal of the IMA*, 8(3):471–529, 2019.
- John C Duchi, Peter W Glynn, and Hongseok Namkoong. Statistics of robust optimization: A generalized empirical likelihood approach. *Mathematics of Operations Research*, 46(3):946–969, 2021.
- Chelsea Finn, Pieter Abbeel, and Sergey Levine. Model-agnostic meta-learning for fast adaptation of deep networks. In *International Conference on Machine Learning*, pp. 1126–1135. PMLR, 2017.
- Luca Franceschi, Paolo Frasconi, Saverio Salzo, Riccardo Grazzi, and Massimiliano Pontil. Bilevel programming for hyperparameter optimization and meta-learning. In *International conference on machine learning*, pp. 1568–1577. PMLR, 2018.
- Hongchang Gao. A doubly recursive stochastic compositional gradient descent method for federated multi-level compositional optimization. In *International Conference on Machine Learning*, pp. 14540–14610. PMLR, 2024.

- Hongchang Gao, Junyi Li, and Heng Huang. On the convergence of local stochastic compositional gradient descent with momentum. In *International Conference on Machine Learning*, pp. 7017–7035. PMLR, 2022.
- Saeed Ghadimi and Guanghui Lan. Stochastic first-and zeroth-order methods for nonconvex stochastic programming. *SIAM Journal on Optimization*, 23(4):2341–2368, 2013.
- Saeed Ghadimi, Andrzej Ruszczyński, and Mengdi Wang. A single timescale stochastic approximation method for nested stochastic optimization. *SIAM Journal on Optimization*, 30(1):960–979, 2020.
- Zhishuai Guo, Rong Jin, Jiebo Luo, and Tianbao Yang. FedX: Federated learning for compositional pairwise risk optimization. *arXiv preprint arXiv:2210.14396*, 2022.
- Farzin Haddadpour, Mohammad Mahdi Kamani, Mehrdad Mahdavi, and Amin Karbasi. Learning distributionally robust models at scale via composite optimization. *arXiv preprint arXiv:2203.09607*, 2022.
- Moritz Hardt, Eric Price, and Nati Srebro. Equality of opportunity in supervised learning. *Advances in neural information processing systems*, 29, 2016.
- Wenqing Hu, Chris Junchi Li, Xiangru Lian, Ji Liu, and Huizhuo Yuan. Efficient smooth non-convex stochastic compositional optimization via stochastic recursive gradient descent. *Advances in Neural Information Processing Systems*, 32, 2019.
- Feihu Huang, Junyi Li, and Heng Huang. Compositional federated learning: Applications in distributionally robust averaging and meta learning. *arXiv preprint arXiv:2106.11264*, 2021.
- Minhui Huang, Dewei Zhang, and Kaiyi Ji. Achieving linear speedup in non-iid federated bilevel learning. In *International Conference on Machine Learning*, pp. 14039–14059. PMLR, 2023.
- Peter Kairouz, H Brendan McMahan, Brendan Avent, Aurélien Bellet, Mehdi Bennis, Arjun Nitin Bhagoji, Kallista Bonawitz, Zachary Charles, Graham Cormode, Rachel Cummings, et al. Advances and open problems in federated learning. *Foundations and Trends® in Machine Learning*, 14(1–2):1–210, 2021.
- Sai Karimireddy, Satyen Kale, Mehryar Mohri, Sashank J Reddi, Sebastian U Stich, and Ananda Theertha Suresh. SCAFFOLD: Stochastic controlled averaging for federated learning. *arXiv e-prints*, pp. arXiv–1910, 2019.
- Sai Praneeth Karimireddy, Martin Jaggi, Satyen Kale, Mehryar Mohri, Sashank J Reddi, Sebastian U Stich, and Ananda Theertha Suresh. Mime: Mimicking centralized stochastic algorithms in federated learning. *arXiv preprint arXiv:2008.03606*, 2020.
- Prashant Khanduri, Pranay Sharma, Haibo Yang, Mingyi Hong, Jia Liu, Ketan Rajawat, and Pramod Varshney. STEM: A stochastic two-sided momentum algorithm achieving near-optimal sample and communication complexities for federated learning. *Advances in Neural Information Processing Systems*, 34:6050–6061, 2021.
- Alex Krizhevsky, Geoffrey Hinton, et al. Learning multiple layers of features from tiny images.(2009), 2009.
- Daniel Levy, Yair Carmon, John C Duchi, and Aaron Sidford. Large-scale methods for distributionally robust optimization. *Advances in Neural Information Processing Systems*, 33:8847–8860, 2020.
- Junyi Li, Feihu Huang, and Heng Huang. Communication-efficient federated bilevel optimization with global and local lower level problems. *Advances in Neural Information Processing Systems*, 36, 2024.
- Tian Li, Anit Kumar Sahu, Manzil Zaheer, Maziar Sanjabi, Ameet Talwalkar, and Virginia Smith. Federated optimization in heterogeneous networks. *Proceedings of Machine learning and systems*, 2:429–450, 2020.
- Xiang Li, Kaixuan Huang, Wenhao Yang, Shusen Wang, and Zhihua Zhang. On the convergence of FedAvg on non-iid data. *arXiv preprint arXiv:1907.02189*, 2019.
- Xiangru Lian, Mengdi Wang, and Ji Liu. Finite-sum composition optimization via variance reduced gradient descent. In *Artificial Intelligence and Statistics*, pp. 1159–1167. PMLR, 2017.

- Brendan McMahan, Eider Moore, Daniel Ramage, Seth Hampson, and Blaise Agüera y Arcas. Communication-efficient learning of deep networks from decentralized data. In *Artificial Intelligence and Statistics*, pp. 1273–1282. PMLR, 2017.
- Hongseok Namkoong and John C Duchi. Variance-based regularization with convex objectives. *Advances in neural information processing systems*, 30, 2017.
- Arkadi Nemirovski, Anatoli Juditsky, Guanghui Lan, and Alexander Shapiro. Robust stochastic approximation approach to stochastic programming. *SIAM Journal on optimization*, 19(4):1574–1609, 2009.
- Lam M Nguyen, Jie Liu, Katya Scheinberg, and Martin Takáč. SARAH: A novel method for machine learning problems using stochastic recursive gradient. In *Proceedings of the 34th International Conference on Machine Learning-Volume 70*, pp. 2613–2621. JMLR. org, 2017.
- Qi Qi, Yi Xu, Rong Jin, Wotao Yin, and Tianbao Yang. Attentional biased stochastic gradient for imbalanced classification. *arXiv preprint arXiv:2012.06951*, 2020a.
- Qi Qi, Yan Yan, Zixuan Wu, Xiaoyu Wang, and Tianbao Yang. A simple and effective framework for pairwise deep metric learning. In *Computer Vision—ECCV 2020: 16th European Conference, Glasgow, UK, August 23–28, 2020, Proceedings, Part XXVII 16*, pp. 375–391. Springer, 2020b.
- Qi Qi, Jiameng Lyu, Er Wei Bai, Tianbao Yang, et al. Stochastic constrained DRO with a complexity independent of sample size. *arXiv preprint arXiv:2210.05740*, 2022.
- Sashank Reddi, Zachary Charles, Manzil Zaheer, Zachary Garrett, Keith Rush, Jakub Konečný, Sanjiv Kumar, and H. Brendan McMahan. Adaptive federated optimization, 2020.
- Alexander Shapiro, Darinka Dentcheva, and Andrzej Ruszczyński. *Lectures on stochastic programming: Modeling and theory*. SIAM, 2021.
- Pranay Sharma, Prashant Khanduri, Saikiran Bulusu, Ketan Rajawat, and Pramod K Varshney. Parallel restarted SPIDER – Communication efficient distributed nonconvex optimization with optimal computation complexity. *arXiv preprint arXiv:1912.06036*, 2019.
- Chaobing Song, Stephen J Wright, and Jelena Diakonikolas. Variance reduction via primal-dual accelerated dual averaging for nonsmooth convex finite-sums. In *International Conference on Machine Learning*, pp. 9824–9834. PMLR, 2021.
- Matthew Staib and Stefanie Jegelka. Distributionally robust optimization and generalization in kernel methods. *Advances in Neural Information Processing Systems*, 32, 2019.
- Davoud Ataee Tarzanagh, Mingchen Li, Christos Thrampoulidis, and Samet Oymak. FedNest: Federated bilevel, minimax, and compositional optimization. *arXiv preprint arXiv:2205.02215*, 2022.
- Quoc Tran Dinh, Deyi Liu, and Lam Nguyen. Hybrid variance-reduced SGD algorithms for minimax problems with nonconvex-linear function. *Advances in Neural Information Processing Systems*, 33:11096–11107, 2020.
- Mengdi Wang, Ji Liu, and Ethan Fang. Accelerating stochastic composition optimization. *Advances in Neural Information Processing Systems*, 29, 2016.
- Mengdi Wang, Ethan X Fang, and Han Liu. Stochastic compositional gradient descent: Algorithms for minimizing compositions of expected-value functions. *Mathematical Programming*, 161(1):419–449, 2017.
- Blake Woodworth, Kumar Kshitij Patel, and Nathan Srebro. Minibatch vs local SGD for heterogeneous distributed learning. *arXiv preprint arXiv:2006.04735*, 2020.
- Xidong Wu, Jianhui Sun, Zhengmian Hu, Junyi Li, Aidong Zhang, and Heng Huang. Federated conditional stochastic optimization. *Advances in Neural Information Processing Systems*, 36, 2024.
- Yangyang Xu. Primal-dual stochastic gradient method for convex programs with many functional constraints. *SIAM Journal on Optimization*, 30(2):1664–1692, 2020.



- Yan Yan, Yi Xu, Qihang Lin, Lijun Zhang, and Tianbao Yang. Stochastic primal-dual algorithms with faster convergence than  $O(1/\sqrt{T})$  for problems without bilinear structure. *arXiv preprint arXiv:1904.10112*, 2019.
- Haibo Yang, Minghong Fang, and Jia Liu. Achieving linear speedup with partial worker participation in non-iid federated learning. *arXiv preprint arXiv:2101.11203*, 2021.
- Haibo Yang, Xin Zhang, Prashant Khanduri, and Jia Liu. Anarchic federated learning. In *International Conference on Machine Learning*, pp. 25331–25363. PMLR, 2022.
- Yifan Yang, Peiyao Xiao, and Kaiyi Ji. Simfbo: Towards simple, flexible and communication-efficient federated bilevel learning. *Advances in Neural Information Processing Systems*, 36, 2024.
- Hao Yu, Rong Jin, and Sen Yang. On the linear speedup analysis of communication efficient momentum SGD for distributed non-convex optimization. In *International Conference on Machine Learning*, pp. 7184–7193. PMLR, 2019a.
- Hao Yu, Sen Yang, and Shenghuo Zhu. Parallel restarted SGD with faster convergence and less communication: Demystifying why model averaging works for deep learning. In *Proceedings of the AAAI Conference on Artificial Intelligence*, volume 33, pp. 5693–5700, 2019b.
- Junyu Zhang and Lin Xiao. A stochastic composite gradient method with incremental variance reduction. *Advances in Neural Information Processing Systems*, 32, 2019.
- Xinwei Zhang, Mingyi Hong, Sairaj Dhople, Wotao Yin, and Yang Liu. FedPD: A federated learning framework with adaptivity to non-iid data. *IEEE Transactions on Signal Processing*, 69:6055–6070, 2021.

## Appendix

**Notations.** The expected value of a random variable (r.v)  $X$  is denoted by  $\mathbb{E}[X]$ . Conditioned on an event  $\mathcal{F}$  the expectation of a r.v  $X$  is denoted by  $\mathbb{E}[X|\mathcal{F}]$ . We denote by  $R$  (resp.  $R^d$ ) the real line (resp. the  $d$  dimensional Euclidean space). We denote by  $[K] := \{1, \dots, K\}$ . The notation  $\|\cdot\|$  defines a standard  $\ell_2$ -norm. For a set  $B$ ,  $|B|$  denotes the cardinality of  $B$ . We use  $\xi \sim \mathcal{D}_h$  and  $\zeta \sim \mathcal{D}_g$  to denote the stochastic samples of functions  $h(\cdot)$  and  $g(\cdot)$  from distributions  $\mathcal{D}_h$  and  $\mathcal{D}_g$ , respectively. A batch of samples from  $h(\cdot)$  (resp.  $g(\cdot)$ ) is denoted by  $b_h$  (resp.  $b_g$ ). Moreover, joint samples of  $h(\cdot)$  and  $g(\cdot)$  are denoted by  $\bar{\xi} = \{b_h, b_g\}$ . We represent by  $\bar{x}$  the empirical average of a sequence of vectors  $\{x_k\}_{k=1}^K$ .

## A Related work

**Centralized CO.** The first non-asymptotic analysis of stochastic CO problems was performed in Wang et al. (2017) where the authors proposed SCGD a two-timescale algorithm for solving the problem (1). The convergence of SCGD was improved in Wang et al. (2016) where the authors proposed an accelerated variant of SCGD. Both SCGD and its accelerated variant achieved convergence rates that were strictly worse than those of SGD for solving non-CO problems. Recently, Ghadimi et al. (2020) and Chen et al. (2021) developed a single time-scale algorithm for solving the CO problem that achieves the same convergence as SGD for solving non-CO problems. Variance-reduced algorithms for solving the CO problems have also been considered in the literature, however, a major drawback of such approaches is the reliance of batch size on the desired solution accuracy Lian et al. (2017); Zhang & Xiao (2019); Hu et al. (2019).

**Distributed CO.** There have been only a few attempts to solve non-convex CO problems in the FL setting, partially, because of the challenges discussed in Section 1. The first FL algorithm to solve the non-convex CO problem, Compositional Federated Learning (ComFedL), was developed in Huang et al. (2021). ComFedL required accuracy-dependent batch sizes that resulted in  $\mathcal{O}(\epsilon^{-4})$  convergence which is significantly worse compared to FedAvg to solve standard non-compositional problems Yu et al. (2019b). In Gao et al. (2022), Local Stochastic Compositional Gradient Descent with Momentum (Local-SCGDM) was proposed which removed the requirement of large batch sizes and achieved an  $\mathcal{O}(\epsilon^{-2})$  convergence. However, Local-SCGDM utilized a non-standard momentum-based update from Ghadimi et al. (2020) that does not resemble a simple SGD-based update. Importantly, the CO problem solved by ComFedL Huang et al. (2021) and Local-SCGDM Gao et al. (2022) is non-standard as the problem is not distributed in the compositional objective (see Remark 2.1). In contrast, we consider a general setting where the compositional objective is also distributed among multiple nodes. Recently, Tarzanagh et al. (2022) proposed a nested optimization framework, FedNest, to solve bilevel problems in the FL setting. The proposed algorithm achieved SGD rates of  $\mathcal{O}(\epsilon^{-2})$  Ghadimi & Lan (2013). Different from the simple SGD-based update rule, FedNest adopted a multi-loop variance reduction-based update. In Haddadpour et al. (2022), the authors proposed a Generalized Composite Incremental Variance Reduction (GCIVR) framework for solving problems of the form (2) in a distributed setting. GCIVR achieved a better convergence rate of  $\mathcal{O}(\epsilon^{-1.5})$ , however, it relied on a double-loop structure and accuracy-dependent large batch sizes to achieve variance reduction. Importantly, none of the above works guarantee linear speedup with the number of clients. Moreover, the current algorithms utilize complicated momentum or VR-based update rules that require computation of accuracy-dependent batch sizes Haddadpour et al. (2022), and/or consider a simple setting where the compositional objective is not distributed among nodes Huang et al. (2021); Gao et al. (2022); Wu et al. (2024). Recently, Gao (2024) developed a multi-level federated CO algorithm that relies on computationally expensive matrix projections and the sharing of multiple sequences to achieve convergence. Similarly, many authors have developed federated bilevel algorithms Li et al. (2024); Huang et al. (2023); Yang et al. (2024) which in theory can be used to solve CO problems. However, such algorithms usually take a complicated multi-loop structure Huang et al. (2023), may require projections Yang et al. (2024), and require sharing of multiple sequences during the execution of the algorithm Li et al. (2024); Huang et al. (2023); Yang et al. (2024).

In contrast to all the above works, our work considers a general setting (2), where the goal is to jointly minimize a compositional and a non-compositional objective in the FL setting. To solve (2), we develop FedDRO and DS-FedDRO FedAvg algorithms for CO problems that achieve (i) the same guarantees as FedAvg for minimizing non-CO problems, (ii) simple single-loop SGD-based updates without the need to perform

projections, (iii) linear speed-up with the number of clients, (iv) improved communication complexity, (v) performance guarantees where the batch sizes required are independent of the desired solution accuracy, and (vi) characterizes the performance as a function of local updates at each client and the data heterogeneity in the inner and outer non-compositional objectives.

**DRO.** DRO has been extensively studied in optimization, machine learning, and statistics literature Ben-Tal et al. (2013); Bertsimas et al. (2018); Duchi et al. (2021); Namkoong & Duchi (2017); Staib & Jegelka (2019). Broadly, DRO problem formulation can be divided into two classes, one is a constrained formulation and the other is the regularized formulation (see (3)) Levy et al. (2020); Duchi et al. (2021). A popular approach to solve the constrained DRO formulation is via primal-dual formulation where algorithms developed for min-max problems can directly be applied to solve constrained DRO Yan et al. (2019); Namkoong & Duchi (2017); Song et al. (2021); Alacaoglu et al. (2022); Tran Dinh et al. (2020). Many algorithms under different settings, e.g., convex, non-convex losses, and stochastic settings have been considered in the past to address such problems. However, primal-dual algorithms suffer from computational bottlenecks, since they require maintaining and updating the set of dual variables equal to the size of the dataset which can become particularly challenging, especially for large-scale machine learning tasks. Recently, Levy et al. (2020) Qi et al. (2022) Haddadpour et al. (2022) have developed algorithms that are applicable to large-scale stochastic settings. Works Levy et al. (2020) and Qi et al. (2022) consider specific formulations of the DRO problem while Haddadpour et al. (2022) considers a general formulation, however, as pointed out earlier the algorithms developed in Haddadpour et al. (2022) are double loop and require accuracy-dependent batch sizes to guarantee convergence (see Table 1). In contrast, in this work, we develop algorithms that solve general instances of CO problems that often arise in DRO formulation. Importantly, the developed algorithms are amenable to large-scale distributed implementation with algorithmic guarantees independent of accuracy-dependent batch sizes.

### A.1 Detailed comparison with Huang et al. (2021); Gao et al. (2022); Tarzanagh et al. (2022)

**Comparison with Huang et al. (2021); Gao et al. (2022).** We note that the problem setting in Huang et al. (2021) and Gao et al. (2022) is significantly different from the one considered in our work. We also would like to point out that the problem formulation considered in our work is more challenging than Huang et al. (2021); Gao et al. (2022) and the algorithms developed for solving the problem in Huang et al. (2021); Gao et al. (2022) cannot solve the problem considered in our work. In the following, we elaborate on the differences between our work and that of Huang et al. (2021); Gao et al. (2022).

In Huang et al. (2021); Gao et al. (2022), the authors consider the objective function

$$\frac{1}{K} \sum_{k=1}^K f_k(g_k(\cdot)). \quad (9)$$

Please observe that in this setting the local nodes have access to local composite functions  $f_k(g_k(\cdot))$ . In contrast, we consider a setting with objective function defined in (2) where the local nodes have access to only  $h_k(\cdot)$  and  $g_k(\cdot)$ <sup>1</sup>. Note that the major difference in the two settings in (9) and (2) comes from the fact that in (9) the inner function  $g_k(\cdot)$  is fully available at each node, whereas in (2) the inner function  $1/K \sum_{k=1}^K g_k(\cdot)$  is not available (since each node can only access  $g_k(\cdot)$ ) at the local nodes. Below, we discuss two major consequences of this:

- **Practicality.** We point out that the setting in (2) is more practical as can be seen from the examples presented in Section 2.1 wherein the DRO problems take the form of (2) rather than (9) in a distributed setting. For illustration, let us consider a simple setting where we have a total of  $m$  samples with each node having access to  $m_k = m/K$  samples. Then the DRO problem with the KL-Divergence problem becomes

$$\min_{x \in \mathbb{R}^d} f\left(\frac{1}{K} \sum_{k=1}^K g_k(\cdot)\right) := \log\left(\frac{1}{m} \sum_{i=1}^m \exp\left(\frac{\ell_i(x)}{\lambda}\right)\right),$$

<sup>1</sup>We would also like to note that the setting considered in the paper can be easily extended to the case where  $f(\cdot) = 1/K \sum_{k=1}^K f_k(\cdot)$  without changing the current results.

where  $f(\cdot) = \log(\cdot)$ ,  $g_k(x) = 1/m_k \sum_{i=1}^{m_k} \exp(\ell_i(x)/\lambda)$ , and  $g(\cdot) = 1/K \sum_{k=1}^K g_k(\cdot)$ . Note that the above formulation is the same as (2) and cannot be formulated using (9). To demonstrate this fact we have used the notation in Table 1 as CO-ND for formulation of (9) where the inner function  $g_k(\cdot)$  can be fully locally accessed by each node whereas our setting is more general with each node having only partial access to the inner-function  $g(\cdot)$ . Next, we show why the algorithms developed for Huang et al. (2021); Gao et al. (2022) cannot be utilized to solve the problem considered in our work.

- **Challenges in solving (2).** A major contribution of our work is in establishing the fact that the algorithms that are developed for solving (2), i.e., the algorithms developed in Huang et al. (2021); Gao et al. (2022), cannot be utilized to solve the problem considered in our work.

To demonstrate this consider the simple deterministic setting with  $f_k = f$ , then the local gradient computed for the objective function in (2) will be  $\nabla g_k(x) \nabla f(g_k(x))$  (please see (6) in the manuscript). Note that this is an unbiased local gradient for objective in (9) which further implies that simple FedAVG-based implementations can be developed for solving this problem as done in Huang et al. (2021); Gao et al. (2022). In contrast, note that the local gradient  $\nabla g_k(x) \nabla f(g_k(x))$  will be a biased local gradient for our problem in (2) and will lead to divergence of FedAvg-based algorithms Huang et al. (2021); Gao et al. (2022) as shown in Section 4.1. Moreover, note that we establish that even if we share the local functions  $g_k(\cdot)$  intermittently among nodes we may not be able to mitigate the bias of local gradient and the developed algorithms will again diverge to incorrect solutions. Please see Section 4.1 for more details.

**Comparison with Tarzanagh et al. (2022).** Next, we note that the algorithm developed in Tarzanagh et al. (2022) is a bilevel algorithm with a multi-loop structure with many tunable (hyper) parameters. Such algorithms are not preferred in practical implementations. In contrast, our algorithm is a single-loop algorithm with simple FedAvg-type SGD updates. In addition to being practical, our work also significantly improves upon the theoretical guarantees achieved in Tarzanagh et al. (2022) by achieving linear speed-up with the number of clients as well as improved communication complexity which any of the works including Huang et al. (2021); Gao et al. (2022); Tarzanagh et al. (2022) are unable to achieve.

## B Detailed experiment setup and additional experiments

**Experiment setup.** The models are trained on an NVIDIA GeForce RTX 3090 GPU with 24 GB of memory. All experiments are conducted using the PyTorch framework, specifically Python 3.9.16 and PyTorch 1.8

**Datasets.** To evaluate the performance of FedDRO and DS-FedDRO, the first section of the experiments is conducted on CIFAR10-ST and CIFAR-100-ST datasets for image classification. The second section of the experiments focuses on the Adult dataset, utilizing tabular data classification and emphasizing DRO for fairness constraints. The CIFAR10-ST and CIFAR-100-ST datasets are modified versions of the original CIFAR10 and CIFAR-100 datasets. The modification involves intentionally creating imbalanced training data. Specifically, only the last 100 images are retained for each class in the first half of the classes, while the other classes and the test data remain unchanged. This creates an imbalanced distribution, posing a challenge for machine learning models to effectively handle imbalanced class scenarios. In the Adult dataset, we consider the race groups “white,” “black,” and “other” as protected groups. We assign the value of  $\epsilon$  as 0.05 and set the noise level to 0.3 during training across all the algorithms.

**Evaluation metrics.** We present the Top-1 accuracies for the training and testing segments of the CIFAR10-ST and CIFAR-100-ST datasets (please see Figures 1 and 2 in Section 6 and Figure 5 in Section B). Furthermore, in addition to training and testing performance, we also include the maximum violation values for both the training and testing sections of the Adult dataset. Specifically, the maximum group violation is evaluated following Haddadpour et al. (2022). To ensure equal opportunities among different groups, even when group membership is uncertain and fluctuating during training, the objective is to develop a solution that is robust across various protected groups in the problem. We assume that we have access to the probability distribution of the actual group memberships ( $P(g^i = j | g^i = k)$  where  $g^i$  represents the true group membership and  $g^i$  represents the noisy group membership). With this information, we aim to enforce fairness constraints by considering all potential proxy groups based on this probability distribution, which can significantly increase the number of constraints. In the case of equal opportunity, our goal is to ensure

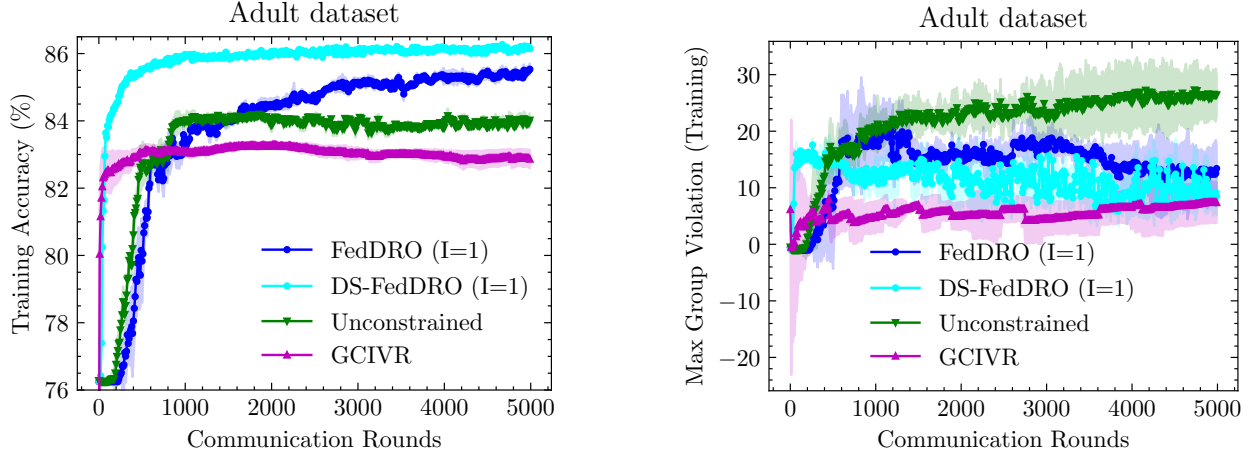

Figure 5: Training performance of FedDRO, DS-FedDRO, GCIVR, and the unconstrained baseline on Adult dataset.

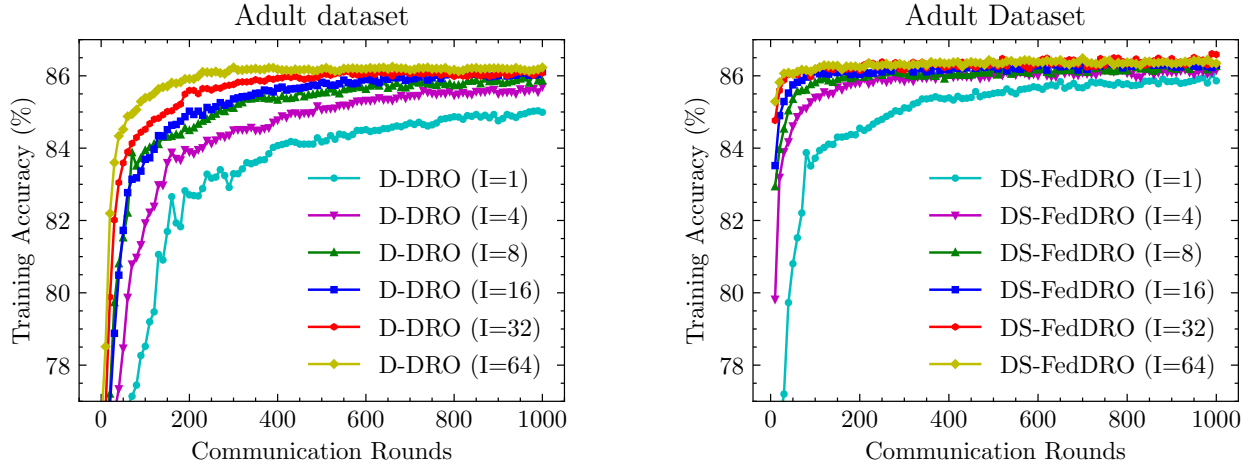

Figure 6: Training performance of FedDRO, DS-FedDRO, on Adult dataset across different  $I$  values.

that the true positive rate ( $TPR$ ) for each group closely aligns with the  $TPR$  of the overall dataset, within a certain threshold  $\epsilon$ . In other words, we want to achieve  $tpr(g = j) \geq tpr(ALL) - \epsilon$  for every proxy group.

**Discussion.** In Figures 5 and 6, we assess the training performance of FedDRO and DS-FedDRO on Adult dataset under the same conditions described in Section 6. Similar to the previous findings in Figure 5, we observe that FedDRO and DS-FedDRO outperform both the constrained version of GCIVR and unconstrained baseline formulation while DS-FedDRO outperforming FedDRO. Evaluating the maximum group violation, we see that the unconstrained optimization demonstrates the poorest performance, while our techniques perform comparably to GCIVR and improve performance as the communication rounds increase. In Figure 6, we again make a similar observation that as  $I$  increases, performance improves for both FedDRO and DS-FedDRO; however, beyond a certain point, further increases in  $I$  do not lead to improvement, highlighting the impact of client drift due to data heterogeneity.

In Figure 7, we evaluate the performance of FedDRO with the number of clients. Specifically, the accuracy demonstrates an upward trend as the value of  $K$  (representing the number of clients) increases in the experiments conducted on the adult dataset. The top two plots depict the training and testing performance for  $I = 1$ , while the bottom two demonstrate the training and testing performance with  $I = 4$ .

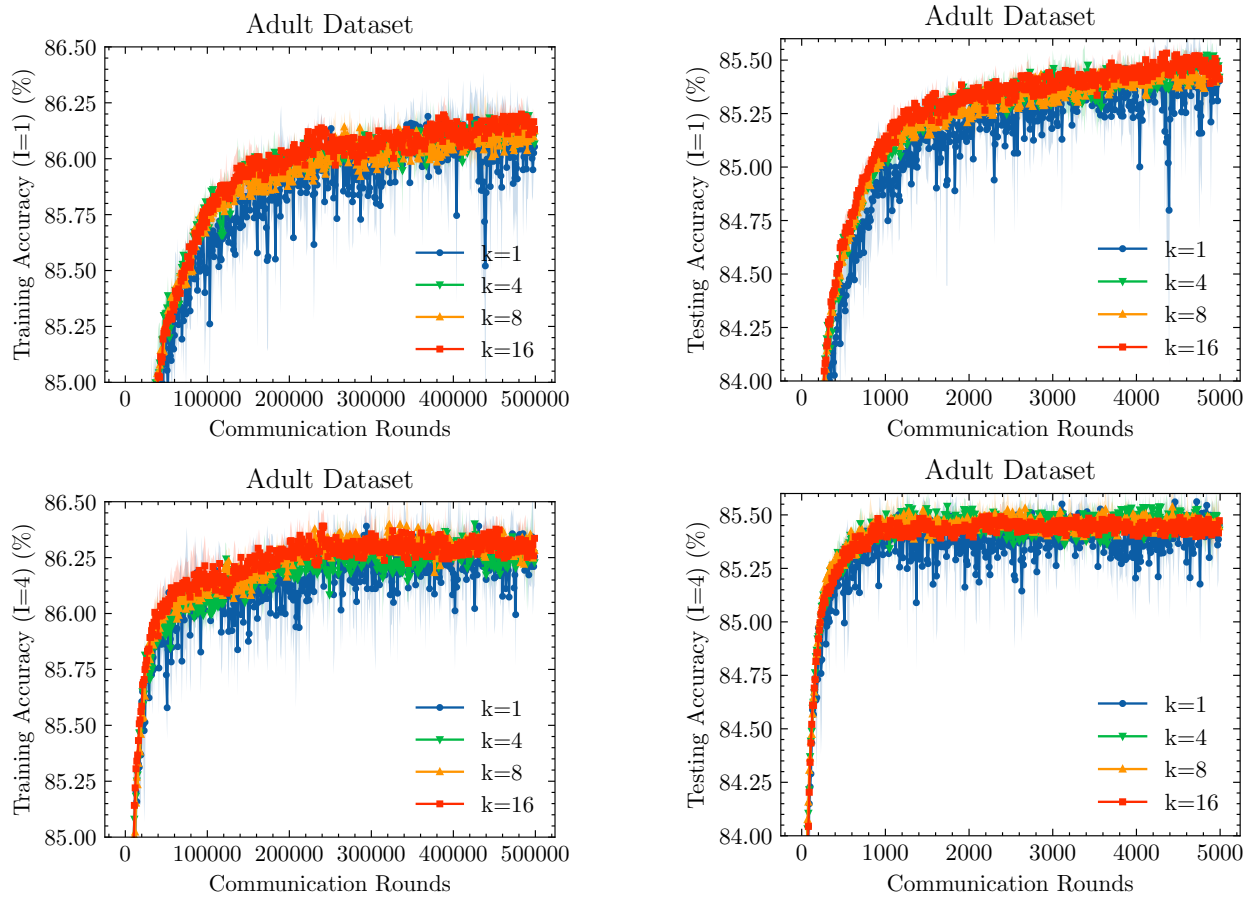Figure 7: Performance of FedDRO with different # of clients ( $K = 1, 4, 8$  &  $16$ ).

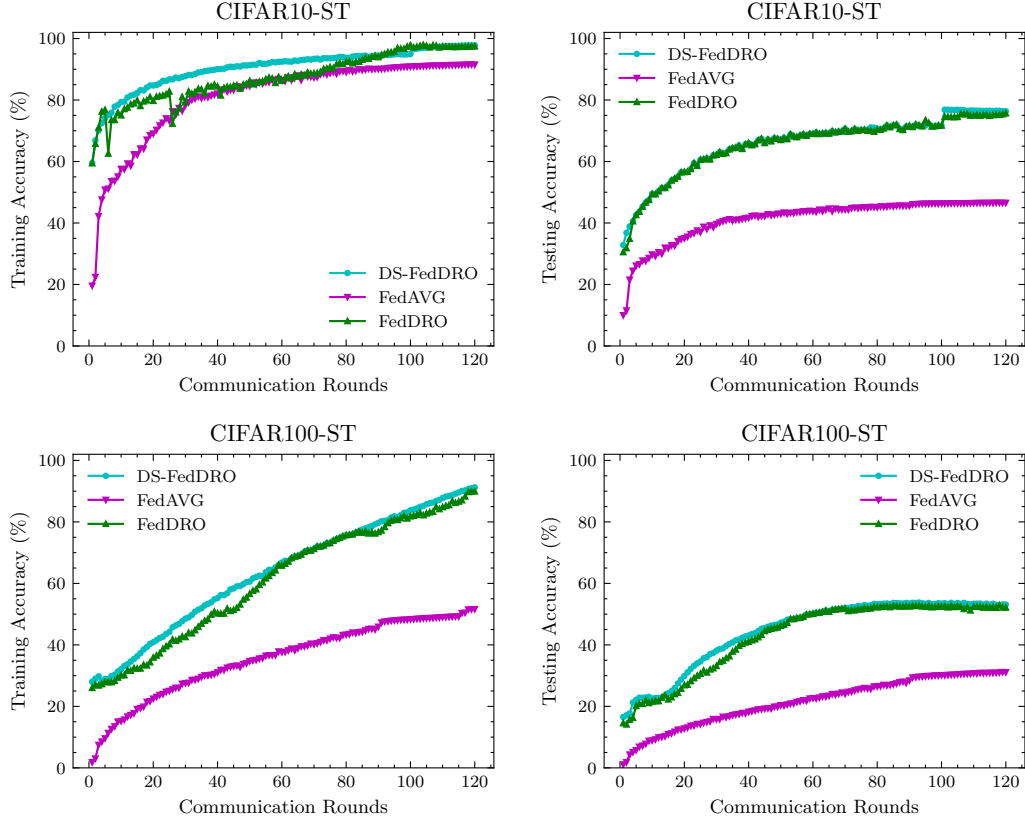Figure 8: Performance comparison on CIFAR10-ST and CIFAR100-ST with  $K = 32$  clients.

Finally, Figure 8 presents the training and test accuracy versus communication rounds on CIFAR10-ST and CIFAR100-ST with 32 participating clients. These additional results demonstrate that FedDRO and DS-FedDRO, maintain stable convergence behavior and achieve stronger performance compared FedAvg even when the number of clients increases. This additional experiment provides further empirical evidence of the scalability and robustness of the proposed approach in larger federated environments.

## C Useful lemmas

**Lemma C.1.** For vectors  $a_1, a_2, \dots, a_n \in \mathbb{R}^d$ , we have

$$\|a_1 + a_2 + \dots + a_n\|^2 \leq n[\|a_1\|^2 + \|a_2\|^2 + \dots + \|a_n\|^2].$$

**Lemma C.2.** For a sequence of vectors  $a_1, a_2, \dots, a_K \in \mathbb{R}^d$ , defining  $\bar{a} := \frac{1}{K} \sum_{k=1}^K a_k$ , we then have

$$\sum_{k=1}^K \|a_k - \bar{a}\|^2 \leq \sum_{k=1}^K \|a_k\|^2.$$

## D Proof of Theorem 4.1

We restate Theorem 4.1 for convenience.

**Theorem D.1** (Vanilla FedAvg: Non-convergence for CO). *There exist functions  $f(\cdot)$  and  $g_k(\cdot)$  for  $k \in [K]$  satisfying Assumptions 3.2, 3.3, and 3.4, and an initialization strategy such that for a fixed number of local updates  $I > 1$ , and for any  $0 < \eta^t < C_\eta$  for  $t \in \{0, 1, \dots, T-1\}$  where  $C_\eta > 0$  is a constant, the iterates generated by Algorithm 1 under both Cases I and II do not converge to the stationary point of  $\Phi(\cdot)$ , where  $\Phi(\cdot)$  is defined in (2) with  $h(x) = 0$ .*

*Proof.* We consider a setting where we have  $K = 2$  nodes in the network. Also, let us consider a single-dimensional setting where the local functions  $g_k : \mathbb{R} \rightarrow \mathbb{R}$  for  $k = \{1, 2\}$  at each node are

$$g_1(x) := 4x - 4 \quad \text{and} \quad g_2(x) := -2x + 4.$$

Moreover, assume  $f : \mathbb{R} \rightarrow \mathbb{R}$  as  $f(y) := \sqrt{y^2 + 4}$ . Therefore, the CO problem becomes

$$\min_{x \in \mathbb{R}} \left\{ \Phi(x) := f\left(\frac{1}{2}(g_1(x) + g_2(x))\right) := \sqrt{\left[\frac{1}{2}(g_1(x) + g_2(x))\right]^2 + 4} = \sqrt{x^2 + 4} \right\}. \quad (10)$$

First, we establish that the functions  $f(\cdot)$  and  $g_k(\cdot)$  for  $k \in [K]$  satisfy Assumptions 3.2, 3.3, and 3.4.

**Claim:** Functions  $f$ ,  $g_1$  and  $g_2$  satisfy Assumptions 3.2, 3.3, and 3.4.

The above claim is straightforward to verify. Specifically, we have

- The functions  $f$ ,  $g_1$  and  $g_2$  are differentiable and Lipschitz smooth.
- The function  $f(\cdot)$  is Lipschitz. Moreover,  $g_k(\cdot)$ 's are deterministic functions implying mean-squared Lipschitzness.
- Assumption 3.3 is automatically satisfied since  $g_k(\cdot)$ 's are deterministic functions.
- Bounded heterogeneity of  $g_k(\cdot)$ 's is satisfied.

Note that it is clear from (10) that the minimizer of  $\Phi(\cdot)$  is  $x^* = 0$ . In the following, we will show that Algorithm 1 is not suitable to solve such problems by establishing that there exists an initialization strategy and choice of step-sizes in the range  $0 < \eta < C_\eta$  where  $C_\eta > 0$  is a constant, the iterates generated by Algorithm 1 under both Cases I and II fail to converge to  $x^*$ . Next, we prove the statement of the theorem in two parts. In the first part, we tackle Case I of Algorithm 1 while in the second part, we prove Case II of Algorithm 1. Next, we consider Case I.

**Case I.** Let us first compute the local gradients at each agent. We have

$$\begin{aligned} \nabla \Phi_1(x) &= \nabla g_1(x) \nabla f(y_1) = 4 \frac{y_1}{\sqrt{y_1^2 + 4}} \\ \nabla \Phi_2(x) &= \nabla g_2(x) \nabla f(y_2) = -2 \frac{y_2}{\sqrt{y_2^2 + 4}} \end{aligned}$$

To prove the results, we consider a simple setting with  $I = 2$ , i.e., each node conducts 2 local updates and shares the model parameters with the server. Moreover, we initialize the local iterates to be  $x_k^0 = \bar{x}^0 = 0.5$  for  $k = \{1, 2\}$  at both nodes. For this setting, let us write the update rule for Algorithm 1 in Case I.

1. Note that for every  $t$  such that  $t \bmod 2 = 0$ , the local update at each node will be:

$$\begin{aligned} x_1^{t+1} &= \bar{x}^t - 4\eta \frac{4\bar{x}^t - 4}{\sqrt{(4\bar{x}^t - 4)^2 + 4}} \\ x_2^{t+1} &= \bar{x}^t + 2\eta \frac{-2\bar{x}^t + 4}{\sqrt{(-2\bar{x}^t + 4)^2 + 4}}, \end{aligned}$$

2. Moreover, the next immediate update at each node will be

$$\begin{aligned} x_1^{t+2} &= x_1^{t+1} - 4\eta \frac{4x_1^{t+1} - 4}{\sqrt{(4x_1^{t+1} - 4)^2 + 4}} \\ x_2^{t+2} &= x_2^{t+1} + 2\eta \frac{-2x_2^{t+1} + 4}{\sqrt{(-2x_2^{t+1} + 4)^2 + 4}}, \end{aligned}$$



3. This process keeps repeating for  $T$  iterations.

Let us focus on the local functions  $f(g_1(x))$  and  $f(g_2(x))$ . Note from the definition of  $g_1(\cdot)$ ,  $g_2(\cdot)$  and  $f(\cdot)$  that the local optimum of these functions will be  $x_1^* = 1$  and  $x_2^* = 2$ , respectively. Consequently, for appropriately chosen step-size  $\eta$  in each iteration  $x_1^{t+1}$  and  $x_1^{t+2}$  at node 1 will converge towards  $x_1^* = 1$  and similarly,  $x_2^{t+1}$  and  $x_2^{t+2}$  at node 2 will converge towards  $x_2^* = 2$ . This implies that we can expect the sequence  $\bar{x}^t$  for each  $t \in [T]$  to not converge to  $x^* = 0$ , the minimizer of the CO problem defined in (10). Let us present this argument formally.

**Claim.** For  $C_\eta = 1/8$  such that we have  $0 < \eta < C_\eta$ , and utilizing the initialization  $\bar{x}^0 = 0.5$ , we have  $\bar{x}^t \geq 0.5$  for every  $t > 0$  with  $t \bmod 2 = 0$ .

The above Claim directly proves the statement of Theorem 4.1 for Case I. Let us now prove the claim formally. We utilize induction to prove the claim.

*Proof of claim:* First, note that the claim is automatically satisfied for  $t = 0$  as a consequence of the initialization strategy. Assuming the claim holds for some  $t \in [T]$  with  $t \bmod 2 = 0$ , i.e., we have  $\bar{x}_t \geq 0.5$  for some  $t \in [T]$  with  $t \bmod 2 = 0$ , we need to show that  $\bar{x}_{t+2} \geq 0.5$ .

In the following, we consider the following three cases: (1)  $0.5 \leq \bar{x}_t < 1$ , (2)  $1 \leq \bar{x}_t < 2$ , and (3)  $\bar{x}_t \geq 2$ . Here, we present the proof for case (1), the rest of the cases follow in a similar manner.

- Note from Step 1 above that since  $0.5 \leq \bar{x}^t < 1$ , we have  $4\bar{x}^t - 4 < 0$  and  $-2\bar{x}^t + 4 > 0$ , which further implies that the locally updated iterates  $x_1^{t+1} > \bar{x}^t \geq 0.5$  and  $x_2^{t+1} > \bar{x}^t \geq 0.5$ . Next, let us analyze the iterates at  $t + 2$ .
- At node 1, we further consider two cases, when  $x_1^{t+1} < 1$  and the other when  $x_1^{t+1} \geq 1$ .
  - First, note that if  $x_1^{t+1} < 1$  we will have  $4x_1^{t+1} - 4 < 0$  in Step 2 above implying  $x_1^{t+2} > x_1^{t+1} > \bar{x}^t \geq 0.5$ .
  - Otherwise, if  $x_1^{t+1} \geq 1$ , we have  $4x_1^{t+1} - 4 \geq 0$  however in this case we have

$$\left| 4\eta \frac{4x_1^{t+1} - 4}{\sqrt{(4x_1^{t+1} - 4)^2 + 4}} \right| \leq 1/2 \quad \text{for } \eta \leq \frac{1}{8},$$

again implying from the update rule in Step 2 that

$$x_1^{t+2} \geq x_1^{t+1} - \frac{1}{2} \geq 0.5,$$

where the last step follows from the fact that  $x_1^{t+1} \geq 1$ . Therefore, we have established that  $x_1^{t+2} \geq 0.5$ .

- At node 2, it is easy to establish that for case (1) with  $0.5 \leq \bar{x}_t < 1$ , we will have  $0.5 \leq x_2^{t+1} \leq 1.5$ . Note from the update rule in Step 2 that for this  $x_2^{t+1}$ , we have  $-2x_2^{t+1} + 4 > 0$  which further implies that  $x_2^{t+2} > x_2^{t+1} \geq 0.5$ .
- Finally, we have established that both  $x_1^{t+2} \geq 0.5$  and  $x_2^{t+2} \geq 0.5$ , implying  $\bar{x}_{t+2} \geq 0.5$ . This completes the proof of Case (1). Note that the proof for the other cases follows in a very similar straightforward manner.

Therefore, we have the proof of Case I in Algorithm 1. Next, we consider Case II where in addition to the model parameters, the local embeddings  $g_k(\cdot)$  for  $k \in [K]$  are also shared intermittently among nodes. Please see Case II in Algorithm 1.

**Case II.** Let us consider the same setting as in Case I. Specifically, we consider a simple setting with  $I = 2$ , i.e., each node conducts 2 local updates and shares the model parameters with the server. Moreover, we initialize the model parameters  $x_k^0 = \bar{x}^0 = 0.5$  for  $k = \{1, 2\}$  at both nodes. Note that this implies from the definition of  $g_1(\cdot)$  and  $g_2(\cdot)$  that  $y_k^0 = \bar{y}^0 = 0.5$  for  $k = \{1, 2\}$ . For this setting, let us write the update rule for Algorithm 1.

1. Note that for every  $t$  such that  $t \bmod 2 = 0$ , the local update at each node will be:

$$\begin{aligned} x_1^{t+1} &= \bar{x}^t - 4\eta \frac{\bar{x}^t}{\sqrt{(\bar{x}^t)^2 + 4}} \\ x_2^{t+1} &= \bar{x}^t + 2\eta \frac{\bar{x}^t}{\sqrt{(\bar{x}^t)^2 + 4}}, \end{aligned}$$

2. Moreover, the next immediate update at each node will be

$$\begin{aligned} x_1^{t+2} &= x_1^{t+1} - 4\eta \frac{4x_1^{t+1} - 4}{\sqrt{(4x_1^{t+1} - 4)^2 + 4}} \\ x_2^{t+2} &= x_2^{t+1} + 2\eta \frac{-2x_2^{t+1} + 4}{\sqrt{(-2x_2^{t+1} + 4)^2 + 4}}, \end{aligned}$$

3. This process keeps repeating for  $T$  iterations.

We point out that this setting is considerably challenging compared to Case I since a cursory look at the algorithm may suggest that sharing the embeddings  $g_k(\cdot)$  for  $k \in [K]$  intermittently may help mitigate the bias in the gradient estimates. However, this is not the case as we show next.

**Claim.** For  $C_\eta = 1/22$  such that we have  $0 < \eta < C_\eta$ , and utilizing the initialization  $\bar{x}^0 = 0.5$ , we have  $\bar{x}^t \geq 0.5$  for every  $t > 0$  with  $t \bmod 2 = 0$ .

We note that for this case the intuition is not as straightforward as in the previous case. We again prove the claim by induction.

*Proof of claim.* First, note that the claim is automatically satisfied for  $t = 0$  as a consequence of the initialization strategy. Assuming the claim holds for some  $t \in [T]$  with  $t \bmod 2 = 0$ , i.e., we have  $\bar{x}_t \geq 0.5$  for some  $t \in [T]$  with  $t \bmod 2 = 0$ , we need to show that  $\bar{x}_{t+2} \geq 0.5$ .

Let us first construct  $x_1^{t+2}$  and  $x_2^{t+2}$  as a function of  $\bar{x}^t$ . To this end, we have from the update rule in Steps 1 and 2 that

$$\begin{aligned} x_1^{t+2} &= \bar{x}^t(1 - \epsilon_1^t) - 4\eta \frac{4\bar{x}^t(1 - \epsilon_1^t) - 4}{\sqrt{(4\bar{x}^t(1 - \epsilon_1^t) - 4)^2 + 4}} \\ x_2^{t+2} &= \bar{x}^t(1 + \epsilon_2^t) + 2\eta \frac{-2\bar{x}^t(1 + \epsilon_2^t) + 4}{\sqrt{(-2\bar{x}^t(1 + \epsilon_2^t) + 4)^2 + 4}}, \end{aligned}$$

where we have defined  $\epsilon_1^t := \frac{4\eta}{\sqrt{(\bar{x}^t)^2 + 4}}$  and  $\epsilon_2^t := \frac{2\eta}{\sqrt{(\bar{x}^t)^2 + 4}}$ , therefore, we have  $\epsilon_1^t = 2\epsilon_2^t$ . Using the above we can evaluate  $\bar{x}^{t+2}$  as

$$\begin{aligned} \bar{x}^{t+2} &= \frac{1}{2}(x_1^{t+2} + x_2^{t+2}) \\ &= \left(\frac{2 - \epsilon_1^t + \epsilon_2^t}{2}\right)\bar{x}^t + 2\eta \frac{4 - 4\bar{x}^t(1 - \epsilon_1^t)}{\sqrt{(4\bar{x}^t(1 - \epsilon_1^t) - 4)^2 + 4}} + \eta \frac{4 - 2\bar{x}^t(1 + \epsilon_2^t)}{\sqrt{(-2\bar{x}^t(1 + \epsilon_2^t) + 4)^2 + 4}} \\ &= \left(1 - \frac{\epsilon_2^t}{2}\right)\bar{x}^t + 2\eta \frac{4 - 4\bar{x}^t(1 - \epsilon_1^t)}{\sqrt{(4\bar{x}^t(1 - \epsilon_1^t) - 4)^2 + 4}} + \eta \frac{4 - 2\bar{x}^t(1 + \epsilon_2^t)}{\sqrt{(-2\bar{x}^t(1 + \epsilon_2^t) + 4)^2 + 4}}, \end{aligned}$$

where in the first term of the last equality, we have used the fact that  $\epsilon_1^t = 2\epsilon_2^t$ . Recall from the induction hypothesis that we have  $\bar{x}^t \geq 0.5$ , and we need to show that  $\bar{x}^{t+2} \geq 0.5$ . Note from above that to establish  $\bar{x}^{t+2} \geq 0.5$ , it suffices to show that

$$\bar{x}^t - 0.5 + 2\eta \frac{4 - 4\bar{x}^t(1 - \epsilon_1^t)}{\sqrt{(4\bar{x}^t(1 - \epsilon_1^t) - 4)^2 + 4}} + \eta \frac{4 - 2\bar{x}^t(1 + \epsilon_2^t)}{\sqrt{(-2\bar{x}^t(1 + \epsilon_2^t) + 4)^2 + 4}} \geq \frac{\epsilon_2^t}{2} \bar{x}^t. \quad (11)$$

From the definition of  $\epsilon_2^t := \frac{2\eta}{\sqrt{(\bar{x}^t)^2 + 4}}$ , we note that the r.h.s. term can be further upper bounded as

$$\frac{\epsilon_2^t}{2} \bar{x}^t = \eta \frac{\bar{x}^t}{\sqrt{(\bar{x}^t)^2 + 4}} \leq \eta.$$

Therefore, to establish to establish  $\bar{x}^{t+2} \geq 0.5$ , it suffices to show that

$$\bar{x}^t - 0.5 + 2\eta \frac{4 - 4\bar{x}^t(1 - 2\epsilon_2^t)}{\sqrt{(4\bar{x}^t(1 - 2\epsilon_2^t) - 4)^2 + 4}} + \eta \frac{4 - 2\bar{x}^t(1 + \epsilon_2^t)}{\sqrt{(-2\bar{x}^t(1 + \epsilon_2^t) + 4)^2 + 4}} \geq \eta, \quad (12)$$

where we have replaced  $\epsilon_1^t = 2\epsilon_2^t$ . Similar to the previous proof here we again consider three cases as listed below

- Case (1).  $\frac{4 - 4\bar{x}^t(1 - 2\epsilon_2^t)}{\sqrt{(4\bar{x}^t(1 - 2\epsilon_2^t) - 4)^2 + 4}} < 0$  and  $\frac{4 - 2\bar{x}^t(1 + \epsilon_2^t)}{\sqrt{(-2\bar{x}^t(1 + \epsilon_2^t) + 4)^2 + 4}} < 0$
- Case (2).  $\frac{4 - 4\bar{x}^t(1 - 2\epsilon_2^t)}{\sqrt{(4\bar{x}^t(1 - 2\epsilon_2^t) - 4)^2 + 4}} < 0$  and  $\frac{4 - 2\bar{x}^t(1 + \epsilon_2^t)}{\sqrt{(-2\bar{x}^t(1 + \epsilon_2^t) + 4)^2 + 4}} > 0$
- Case (3).  $\frac{4 - 4\bar{x}^t(1 - 2\epsilon_2^t)}{\sqrt{(4\bar{x}^t(1 - 2\epsilon_2^t) - 4)^2 + 4}} \geq 0$  and  $\frac{4 - 2\bar{x}^t(1 + \epsilon_2^t)}{\sqrt{(-2\bar{x}^t(1 + \epsilon_2^t) + 4)^2 + 4}} \geq 0$

We first consider Case (1). Note that Case (1) implies that  $\bar{x}^t > 1$ , and using the fact that  $\frac{4 - 4\bar{x}^t(1 - 2\epsilon_2^t)}{\sqrt{(4\bar{x}^t(1 - 2\epsilon_2^t) - 4)^2 + 4}} \geq -1$  and  $\frac{4 - 2\bar{x}^t(1 + \epsilon_2^t)}{\sqrt{(-2\bar{x}^t(1 + \epsilon_2^t) + 4)^2 + 4}} \geq -1$ , we get

$$\bar{x}^t - 0.5 + 2\eta \frac{4 - 4\bar{x}^t(1 - 2\epsilon_2^t)}{\sqrt{(4\bar{x}^t(1 - 2\epsilon_2^t) - 4)^2 + 4}} + \eta \frac{4 - 2\bar{x}^t(1 + \epsilon_2^t)}{\sqrt{(-2\bar{x}^t(1 + \epsilon_2^t) + 4)^2 + 4}} \geq 0.5 - 3\eta$$

Note that by choosing  $\eta \leq 1/8$ , the sufficient condition in (12) is satisfied, which further implies that under Case (1), we have  $\bar{x}^{t+2} \geq 0.5$ . Next, we consider Case (2).

Note that for Case (2) we have  $2/(1 + \epsilon_2^t) > \bar{x}^t > 1$ , next using the fact that  $\frac{4 - 4\bar{x}^t(1 - 2\epsilon_2^t)}{\sqrt{(4\bar{x}^t(1 - 2\epsilon_2^t) - 4)^2 + 4}} \geq -1$  and  $\frac{4 - 2\bar{x}^t(1 + \epsilon_2^t)}{\sqrt{(-2\bar{x}^t(1 + \epsilon_2^t) + 4)^2 + 4}} \geq 0$ , we get

$$\bar{x}^t - 0.5 + 2\eta \frac{4 - 4\bar{x}^t(1 - 2\epsilon_2^t)}{\sqrt{(4\bar{x}^t(1 - 2\epsilon_2^t) - 4)^2 + 4}} + \eta \frac{4 - 2\bar{x}^t(1 + \epsilon_2^t)}{\sqrt{(-2\bar{x}^t(1 + \epsilon_2^t) + 4)^2 + 4}} \geq 0.5 - 2\eta$$

Again choosing  $\eta \leq 1/8$ , the sufficient condition in (12) is satisfied, which further implies that under Case (2), we have  $\bar{x}^{t+2} \geq 0.5$ .

Finally, we consider the most challenging Case (3). Note that in Case (3) we have  $0.5 \leq \bar{x}^t \leq 1/(1 - 2\epsilon_2^t)$ . For this case, we revisit the sufficient condition in (11) and make it tight. Recall that we had from (11) that

$$\bar{x}^t - 0.5 + 2\eta \frac{4 - 4\bar{x}^t(1 - 2\epsilon_2^t)}{\sqrt{(4\bar{x}^t(1 - 2\epsilon_2^t) - 4)^2 + 4}} + \eta \frac{4 - 2\bar{x}^t(1 + \epsilon_2^t)}{\sqrt{(-2\bar{x}^t(1 + \epsilon_2^t) + 4)^2 + 4}} \geq \eta \frac{\bar{x}^t}{\sqrt{(\bar{x}^t)^2 + 4}},$$

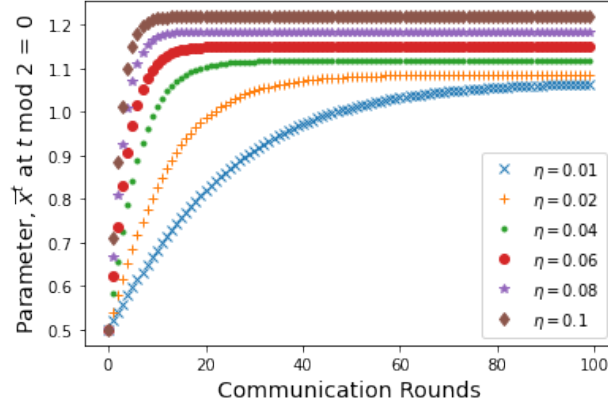

Figure 9: The evolution of parameter  $\bar{x}^t$  at each communication round for different choices of step-sizes  $\eta$ .

now using the fact that for Case (3), we have  $0.5 \leq \bar{x}^t \leq 1/(1-2\epsilon_2^t)$ , we can restate the sufficient condition as

$$\bar{x}^t - 0.5 + 2\eta \frac{4 - 4\bar{x}^t(1 - 2\epsilon_2^t)}{\sqrt{(4\bar{x}^t(1 - 2\epsilon_2^t) - 4)^2 + 4}} + \eta \frac{4 - 2\bar{x}^t(1 + \epsilon_2^t)}{\sqrt{(-2\bar{x}^t(1 + \epsilon_2^t) + 4)^2 + 4}} \geq \frac{\eta}{2}, \quad (13)$$

where we have used the fact that  $0.5 \leq \bar{x}^t \leq 1.1$  for  $\eta < 1/22$  and the fact that the term  $\eta \frac{\bar{x}^t}{\sqrt{(\bar{x}^t)^2 + 4}} > \frac{\eta}{2}$  for  $0.5 \leq \bar{x}^t \leq 1.1$ . Moreover,  $\eta < 1/22$  ensures that  $1 + \epsilon_2^t \leq 23/22$ . Next, using the fact that  $\frac{4 - 4\bar{x}^t(1 - 2\epsilon_2^t)}{\sqrt{(4\bar{x}^t(1 - 2\epsilon_2^t) - 4)^2 + 4}} > 0$  and

$$\frac{4 - 2\bar{x}^t(1 + \epsilon_2^t)}{\sqrt{(-2\bar{x}^t(1 + \epsilon_2^t) + 4)^2 + 4}} \geq \frac{4 - 2\bar{x}^t(23/22)}{\sqrt{(-2\bar{x}^t(1 + \epsilon_2^t) + 4)^2 + 4}} \geq \frac{6}{10},$$

Substituting in the l.h.s. of the sufficient condition stated in (13), we get

$$\bar{x}^t - 0.5 + 2\eta \frac{4 - 4\bar{x}^t(1 - 2\epsilon_2^t)}{\sqrt{(4\bar{x}^t(1 - 2\epsilon_2^t) - 4)^2 + 4}} + \eta \frac{4 - 2\bar{x}^t(1 + \epsilon_2^t)}{\sqrt{(-2\bar{x}^t(1 + \epsilon_2^t) + 4)^2 + 4}} \geq \frac{6\eta}{10},$$

where we used that fact that  $\bar{x}^t \geq 0.5$ . Note that  $\frac{6\eta}{10} > \frac{\eta}{2}$ , therefore, the sufficient condition stated in (13) is satisfied. This further implies that the  $\bar{x}^{t+2} \geq 0.5$  during the execution of the algorithm.

Recall that the optimal solution for solving the CO problem is  $x^* = 0$ . This means Algorithm 1 under both Case I and II fails to converge to the stationary solution.

Hence, the theorem is proved.  $\square$

Finally, we corroborate the result presented in Theorem D.1 via numerical experiment for solving (10) using Case II of Algorithm 1. In Figure 9, we plot the evolution of  $\bar{x}^t$  in each communication round. We note that  $\bar{x}^t$  is lower bounded by 0.5 as established in the proof of Theorem 4.2 above. In fact, note that for all the settings as the communication rounds increase,  $\bar{x}^t$  eventually converges to a quantity that is greater than 1. However, as discussed for the example considered to establish the proof of Theorem 4.1, we know that the true optimizer of the CO problem (10) is  $x^* = 0$ .

## E Proof of Theorem 4.2

**Theorem E.1** (Modified FedAvg: Convergence for CO). *Suppose we modify Algorithm 1 such that  $y_k^t = \bar{y}^t$  is updated at each iteration  $t \in \{0, 1, \dots, T-1\}$  instead of  $[t+1 \bmod I]$  iterations as in current version of*

*Algorithm 1.* Then if functions  $f(\cdot)$  and  $g_k(x)$  for  $k \in [K]$  satisfy Assumptions 3.2, 3.3, and 3.4 such that for a fixed number of local updates  $1 \leq I \leq \mathcal{O}(T^{1/4})$ , there exists a choice of  $\eta^t > 0$  for  $t \in \{0, 1, \dots, T-1\}$  such that the iterates generated by (modified) Algorithm 1 converge to the stationary point of  $\Phi(\cdot)$ , where  $\Phi(\cdot)$  is defined in (2) with  $h(x) = 0$ .

*Proof.* Theorem E.1 is a direct consequence of Theorem 4.3. Therefore, we next prove the main result of the paper in Theorem 4.3.  $\square$

## F Proof of Theorem 4.3

For the purpose of this proof, we define the filtration  $\mathcal{F}^t$  as the sigma-algebra generated by the iterates  $x_k^1, x_k^1, \dots, x_k^t$  as

$$\mathcal{F}^t := \sigma(x_k^1, x_k^1, \dots, x_k^t, \text{ for all } k \in [K]).$$

Moreover, we define the following. Assuming the total training rounds,  $T-1$ , to be a multiple of  $I$ , i.e.,  $T-1 = S \times I$  for some  $S \in \mathbb{N}$ , we define  $t_s := s \times I$  with  $s \in \{0, 1, \dots, S\}$  as the training rounds where the potentially high-dimensional model parameters,  $x_k^t$ , are shared among the clients. Next, we state Theorem 4.3 again and present the detailed proof of the result.

**Theorem F.1.** Under Assumptions 3.2, 3.3, and 3.4 and with the choice of step-size  $\eta^t = \eta = \sqrt{\frac{|b|K}{T}}$  for all  $t \in \{0, 1, \dots, T-1\}$ . Moreover, choosing the momentum parameter  $\beta^t = \beta = c_\beta \eta$  where  $c_\beta = 4B_g^4 L_f^2$ . Then for

$$T \geq T_{th} := \max \left\{ \frac{4(L_\Phi |b|K + 8B_g^2)^2}{|b|K}, \frac{B_g^4(96L_h^2 + 96B_f^2 L_g^2)^2}{|b|K(L_h^2 + 2B_f^2 L_g^2 + 4B_g^4 L_f^2)^2}, \right. \\ \left. (216L_h^2 + 216B_f^2 L_g^2)I^2 |b|K \right\}$$

The iterates generated by Algorithm 2 satisfy

$$\mathbb{E} \|\nabla \Phi(\bar{x}^{a(T)})\|^2 \leq \frac{2[\Phi(\bar{x}^0) - \Phi(x^*) + \|\bar{y}^0 - g(\bar{x}^0)\|^2]}{\sqrt{|b|KT}} + \frac{K(I-1)^2}{T} [2\bar{L}_{f,g}\sigma_h^2 + 2B_f^2 \bar{L}_{f,g}\sigma_g^2] \\ + \frac{1}{\sqrt{|b|KT}} \left[ (4L_\Phi + 8B_g^2)\sigma_h^2 + (4L_\Phi B_f^2 + 4c_\beta^2 + 8B_f^2 B_g^2)\sigma_g^2 \right] \\ + \frac{|b|K(I-1)^2}{T} [6\bar{L}_{f,g}\Delta_h^2 + 6B_f^2 \bar{L}_{f,g}\Delta_g^2] + \frac{1}{\sqrt{|b|KT}} [96B_g^2 \Delta_h^2 + 96B_f^2 B_g^2 \Delta_g^2].$$

**Corollary F.2.** Under the same setting as Theorem 4.3, for the choice of local updates  $I = T^{1/4}/(|b|K)^{3/4}$ , the iterates generated by Algorithm 2 satisfy

$$\mathbb{E} \|\nabla \Phi(\bar{x}^{a(T)})\|^2 \leq \frac{2[\Phi(\bar{x}^0) - \Phi(x^*) + \|\bar{y}^0 - g(\bar{x}^0)\|^2]}{\sqrt{|b|KT}} + \frac{C_{\sigma_h}}{\sqrt{|b|KT}} \sigma_h^2 + \frac{C_{\sigma_g}}{\sqrt{|b|KT}} \sigma_g^2 \\ + \frac{C_{\Delta_h}}{\sqrt{|b|KT}} \Delta_h^2 + \frac{C_{\Delta_g}}{\sqrt{|b|KT}} \Delta_g^2. \quad (14)$$

where the constants  $C_{\sigma_h}$ ,  $C_{\sigma_g}$ ,  $C_{\Delta_h}$ , and  $C_{\Delta_g}$  are constants dependent on  $L_g$ ,  $L_h$ ,  $L_f$ ,  $B_g$ , and  $B_f$ .

We prove the Theorem in multiple steps with the help of several intermediate Lemmas.

**Lemma F.3 (Descent in function value).** *Under Assumptions 3.2-3.4, the iterates generated by Algorithm 2 satisfy*

$$\begin{aligned} \mathbb{E}[\Phi(\bar{x}^{t+1}) - \Phi(\bar{x}^t)] &\leq -\frac{\eta^t}{2} \mathbb{E} \|\nabla \Phi(\bar{x}^t)\|^2 - \left( \frac{\eta^t}{2} - (\eta^t)^2 L_\Phi \right) \mathbb{E} \left\| \frac{1}{K} \sum_{k=1}^K \mathbb{E}[\nabla \Phi_k(x_k^t; \bar{\xi}_k^t) | \mathcal{F}^t] \right\|^2 \\ &\quad + \eta^t (L_h^2 + 2B_f^2 L_g^2 + 4B_g^4 L_F^2) \frac{1}{K} \sum_{k=1}^K \mathbb{E} \|x_k^t - \bar{x}^t\|^2 + 4B_g^4 L_f^2 \eta^t \mathbb{E} \left\| \bar{y}^t - \frac{1}{K} \sum_{k=1}^K g_k(x_k^t) \right\|^2 \\ &\quad + \frac{2(\eta^t)^2 L_\Phi}{K|b_h|} \sigma_h^2 + \frac{2(\eta^t)^2 L_\Phi B_f^2}{K|b_g|} \sigma_g^2. \end{aligned}$$

for all  $t \in \{0, 1, \dots, T-1\}$ .

*Proof.* Using the fact that the loss function  $\Phi(x)$  is  $L_\Phi$ -Lipschitz smooth, we get

$$\begin{aligned} &\mathbb{E}[\Phi(\bar{x}^{t+1}) - \Phi(\bar{x}^t)] \\ &\leq \mathbb{E} \left[ \langle \nabla \Phi(\bar{x}^t), \bar{x}^{t+1} - \bar{x}^t \rangle + \frac{L_\Phi}{2} \|\bar{x}^{t+1} - \bar{x}^t\|^2 \right] \\ &\stackrel{(a)}{\leq} \mathbb{E} \left[ -\eta^t \left\langle \nabla \Phi(\bar{x}^t), \frac{1}{K} \sum_{k=1}^K \nabla \Phi_k(x_k^t; \bar{\xi}_k^t) \right\rangle + \frac{(\eta^t)^2 L_\Phi}{2} \left\| \frac{1}{K} \sum_{k=1}^K \nabla \Phi_k(x_k^t; \bar{\xi}_k^t) \right\|^2 \right] \\ &\stackrel{(b)}{\leq} \mathbb{E} \left[ -\eta^t \left\langle \nabla \Phi(\bar{x}^t), \frac{1}{K} \sum_{k=1}^K \mathbb{E}[\nabla \Phi_k(x_k^t; \bar{\xi}_k^t) | \mathcal{F}^t] \right\rangle + \frac{(\eta^t)^2 L_\Phi}{2} \left\| \frac{1}{K} \sum_{k=1}^K \nabla \Phi_k(x_k^t; \bar{\xi}_k^t) \right\|^2 \right] \\ &\stackrel{(c)}{\leq} -\frac{\eta^t}{2} \mathbb{E} \|\nabla \Phi(\bar{x}^t)\|^2 - \left( \frac{\eta^t}{2} - (\eta^t)^2 L_\Phi \right) \mathbb{E} \left\| \frac{1}{K} \sum_{k=1}^K \mathbb{E}[\nabla \Phi_k(x_k^t; \bar{\xi}_k^t) | \mathcal{F}^t] \right\|^2 \\ &\quad + \underbrace{\frac{\eta^t}{2} \mathbb{E} \left\| \nabla \Phi(\bar{x}^t) - \frac{1}{K} \sum_{k=1}^K \mathbb{E}[\nabla \Phi_k(x_k^t; \bar{\xi}_k^t) | \mathcal{F}^t] \right\|^2}_{\text{Term I}} \\ &\quad + \underbrace{(\eta^t)^2 L_\Phi \mathbb{E} \left\| \frac{1}{K} \sum_{k=1}^K \nabla \Phi_k(x_k^t; \bar{\xi}_k^t) - \frac{1}{K} \sum_{k=1}^K \mathbb{E}[\nabla \Phi_k(x_k^t; \bar{\xi}_k^t) | \mathcal{F}^t] \right\|^2}_{\text{Term II}}, \end{aligned} \tag{15}$$

where (a) follows from the update step in Algorithm 2; (b) results from moving the conditional expectation w.r.t. the filtration  $\mathcal{F}^t$  inside the inner-product; finally, (c) uses the equality  $2\langle a, b \rangle = \|a\|^2 + \|b\|^2 - \|a - b\|^2$  for  $a, b \in \mathbb{R}^d$  and Lemma C.1 to split the last term.

Next, we consider Terms I and II separately. First, note that from the definition of  $\nabla \Phi_k(x_k^t; \bar{\xi}_k^t)$  for all  $k \in [K]$ , we have

$$\begin{aligned} \mathbb{E}[\nabla \Phi_k(x_k^t; \bar{\xi}_k^t) | \mathcal{F}^t] &= \mathbb{E} \left[ \frac{1}{|b_{h_k}^t|} \sum_{i \in b_{h_k}^t} \nabla h_k(x_k^t; \xi_{k,i}^t) + \frac{1}{|b_{g_k}^t|} \sum_{j \in b_{g_k}^t} \nabla g_k(x_k^t; \zeta_{k,j}^t) \nabla f(\bar{y}^t) \middle| \mathcal{F}^t \right] \\ &\stackrel{(a)}{=} \nabla h_k(x_k^t) + \nabla g_k(x_k^t) \nabla f(\bar{y}^t) \end{aligned} \tag{16}$$

where (a) follows from Assumption 3.3. Moreover, from the definition of  $\Phi(\bar{x}^t)$ , we have

$$\nabla \Phi(\bar{x}^t) = \frac{1}{K} \sum_{k=1}^K \left[ \nabla h_k(\bar{x}^t) + \nabla g_k(\bar{x}^t) \nabla f(g(\bar{x}^t)) \right], \tag{17}$$

where  $g(\bar{x}^t) = \frac{1}{K} \sum_{k=1}^K g_k(\bar{x}^t)$ . Next, utilizing the expressions obtained in (16) and (17) we bound Term I as

$$\begin{aligned}
\text{Term I} &:= \mathbb{E} \left\| \nabla \Phi(\bar{x}^t) - \frac{1}{K} \sum_{k=1}^K \mathbb{E}[\nabla \Phi_k(x_k^t; \bar{\xi}_k^t) | \mathcal{F}^t] \right\|^2 \\
&= \mathbb{E} \left\| \frac{1}{K} \sum_{k=1}^K \left[ \nabla h_k(\bar{x}^t) + \nabla g_k(\bar{x}^t) \nabla f(g(\bar{x}^t)) - [\nabla h_k(x_k^t) + \nabla g_k(x_k^t) \nabla f(\bar{y}^t)] \right] \right\|^2 \\
&\stackrel{(a)}{\leq} \frac{2}{K} \sum_{k=1}^K \left[ \mathbb{E} \|\nabla h_k(x_k^t) - \nabla h_k(\bar{x}^t)\|^2 + \|\nabla g_k(x_k^t) \nabla f(\bar{y}^t) - \nabla g_k(\bar{x}^t) \nabla f(g(\bar{x}^t))\|^2 \right] \\
&\stackrel{(b)}{\leq} \frac{2L_h^2}{K} \sum_{k=1}^K \mathbb{E} \|x_k^t - \bar{x}^t\|^2 + \frac{4}{K} \sum_{k=1}^K \mathbb{E} \|\nabla g_k(x_k^t) [\nabla f(\bar{y}^t) - \nabla f(g(\bar{x}^t))]\|^2 \\
&\quad + \frac{4}{K} \sum_{k=1}^K \mathbb{E} \|\nabla g_k(x_k^t) - \nabla g_k(\bar{x}^t)\| \nabla f(g(\bar{x}^t))\|^2 \\
&\stackrel{(c)}{\leq} \frac{2L_h^2}{K} \sum_{k=1}^K \mathbb{E} \|x_k^t - \bar{x}^t\|^2 + \frac{4B_g^2}{K} \sum_{k=1}^K \mathbb{E} \|\nabla f(\bar{y}^t) - \nabla f(g(\bar{x}^t))\|^2 \\
&\quad + \frac{4B_f^2}{K} \sum_{k=1}^K \mathbb{E} \|\nabla g_k(x_k^t) - \nabla g_k(\bar{x}^t)\|^2 \\
&\stackrel{(d)}{\leq} \left( \frac{2L_h^2}{K} + \frac{4B_f^2 L_g^2}{K} \right) \sum_{k=1}^K \mathbb{E} \|x_k^t - \bar{x}^t\|^2 + 4B_g^2 L_f^2 \underbrace{\mathbb{E} \|\bar{y}^t - g(\bar{x}^t)\|^2}_{\text{Term III}}.
\end{aligned}$$

Next, let us consider Term III above.

$$\begin{aligned}
\text{Term III} &:= \mathbb{E} \|\bar{y}^t - g(\bar{x}^t)\|^2 \\
&\stackrel{(a)}{\leq} 2\mathbb{E} \left\| \bar{y}^t - \frac{1}{K} \sum_{k=1}^K g_k(x_k^t) \right\|^2 + 2\mathbb{E} \left\| \frac{1}{K} \sum_{k=1}^K g_k(x_k^t) - g(\bar{x}^t) \right\|^2 \\
&\stackrel{(b)}{\leq} 2\mathbb{E} \left\| \bar{y}^t - \frac{1}{K} \sum_{k=1}^K g_k(x_k^t) \right\|^2 + \frac{2}{K} \sum_{k=1}^K \mathbb{E} \|g_k(x_k^t) - g_k(\bar{x}^t)\|^2 \\
&\stackrel{(c)}{\leq} 2\mathbb{E} \left\| \bar{y}^t - \frac{1}{K} \sum_{k=1}^K g_k(x_k^t) \right\|^2 + \frac{2B_g^2}{K} \sum_{k=1}^K \mathbb{E} \|x_k^t - \bar{x}^t\|^2,
\end{aligned}$$

where (a) follows from the application of Lemma C.1; (b) results from the definition of  $g(x) = \frac{1}{K} \sum_{k=1}^K g_k(x)$  and the use of Lemma C.1; finally (c) results from the Lipschitz-ness of  $g_k(\cdot)$  for all  $k \in [K]$ .

Next, we consider Term II below

$$\begin{aligned}
\text{Term II} &:= \mathbb{E} \left\| \frac{1}{K} \sum_{k=1}^K \nabla \Phi_k(x_k^t; \bar{\xi}_k^t) - \frac{1}{K} \sum_{k=1}^K \mathbb{E}[\nabla \Phi_k(x_k^t; \bar{\xi}_k^t) | \mathcal{F}^t] \right\|^2 \\
&\stackrel{(a)}{=} \frac{1}{K^2} \sum_{k=1}^K \mathbb{E} \|\nabla \Phi_k(x_k^t; \bar{\xi}_k^t) - \mathbb{E}[\nabla \Phi_k(x_k^t; \bar{\xi}_k^t) | \mathcal{F}^t]\|^2 \\
&\stackrel{(b)}{=} \frac{1}{K^2} \sum_{k=1}^K \mathbb{E} \left\| \frac{1}{|b_{h_k}^t|} \sum_{i \in b_{h_k}^t} \nabla h_k(x_k^t; \xi_{k,i}^t) + \frac{1}{|b_{g_k}^t|} \sum_{j \in b_{g_k}^t} \nabla g_k(x_k^t; \xi_{k,j}^t) \nabla f(\bar{y}^t) \right. \\
&\quad \left. - [\nabla h_k(x_k^t) + \nabla g_k(x_k^t) \nabla f(\bar{y}^t)] \right\|^2
\end{aligned}$$

$$\begin{aligned}
&\stackrel{(c)}{=} \frac{2}{K^2} \sum_{k=1}^K \mathbb{E} \left\| \frac{1}{|b_{h_k}^t|} \sum_{i \in b_{h_k}^t} \nabla h_k(x_k^t; \xi_{k,i}^t) - \nabla h_k(x_k^t) \right\|^2 \\
&\quad + \frac{2}{K^2} \sum_{k=1}^K \mathbb{E} \left\| \frac{1}{|b_{g_k}^t|} \sum_{j \in b_{g_k}^t} \nabla g_k(x_k^t; \zeta_{k,j}^t) \nabla f(\bar{y}^t) - \nabla g_k(x_k^t) \nabla f(\bar{y}^t) \right\|^2 \\
&\stackrel{(d)}{\leq} \frac{2\sigma_h^2}{K|b_h|} + \frac{2\sigma_g^2 B_f^2}{K|b_g|},
\end{aligned}$$

where (a) follows from the application of Lemma C.1; (b) follows from the definition of the stochastic gradient in (7) and its expectation in (16); (c) again uses Lemma C.1; Finally, (d) uses Cauchy-Schwartz inequality, Lipschitzness of  $f(\bar{y}^t)$  and Assumption 3.3 and using  $|b_{h_k}| = |b_h|$  and  $|b_{g_k}| = |b_g|$  for all  $k \in [K]$ .

Next, substituting the upper bounds obtained for Terms I, II, and III into (15), we get

$$\begin{aligned}
\mathbb{E}[\Phi(\bar{x}^{t+1}) - \Phi(\bar{x}^t)] &\leq -\frac{\eta^t}{2} \mathbb{E} \|\nabla \Phi(\bar{x}^t)\|^2 - \left( \frac{\eta^t}{2} - (\eta^t)^2 L_\Phi \right) \mathbb{E} \left\| \frac{1}{K} \sum_{k=1}^K \mathbb{E}[\nabla \Phi_k(x_k^t; \bar{\xi}_k^t) | \mathcal{F}^t] \right\|^2 \\
&\quad + \underbrace{\eta^t (L_h^2 + 2B_f^2 L_g^2 + 4B_g^4 L_F^2)}_{\text{Term IV}} \underbrace{\frac{1}{K} \sum_{k=1}^K \mathbb{E} \|x_k^t - \bar{x}^t\|^2 + 4B_g^4 L_f^2 \eta^t \mathbb{E} \left\| \bar{y}^t - \frac{1}{K} \sum_{k=1}^K g_k(x_k^t) \right\|^2}_{\text{Term V}} \\
&\quad + \frac{2(\eta^t)^2 L_\Phi}{K|b_h|} \sigma_h^2 + \frac{2(\eta^t)^2 L_\Phi B_f^2}{K|b_g|} \sigma_g^2. \tag{18}
\end{aligned}$$

Therefore, we have the proof of the Lemma.  $\square$

Next, we bound Terms IV and V in (18) in the next Lemmas. Let us first consider Term IV.

**Lemma F.4 (Client drift).** *Under Assumptions 3.2-3.4, the iterates generated by Algorithm 2 satisfy*

$$\begin{aligned}
\frac{1}{K} \sum_{k=1}^K \mathbb{E} \|x_k^t - \bar{x}^t\| &\leq (I-1) \left( 24L_h^2 + 24B_f^2 L_g^2 \right) \sum_{\ell=t_s}^{t-1} \frac{(\eta^\ell)^2}{K} \sum_{k=1}^K \mathbb{E} \|x_k^\ell - \bar{x}^\ell\|^2 \\
&\quad + (I-1) \left( \frac{4}{|b_h^t|} \sigma_h^2 + \frac{4B_f^2}{|b_g^t|} \sigma_g^2 \right) \sum_{\ell=t_s}^{t-1} (\eta^\ell)^2 + (I-1) \left( 12\Delta_h^2 + 12B_f^2 \Delta_g^2 \right) \sum_{\ell=t_s}^{t-1} (\eta^\ell)^2.
\end{aligned}$$

*Proof.* Recall from the definition of  $t_s$  that we have  $x_k^{t_s} = \bar{x}^{t_s}$  for all  $s \in \{0, 1, \dots, S\}$ . Next, we have from the update rule in Algorithm 2 that for all  $t \in [t_s + 1, t_{s+1} - 1]$

$$x_k^t = x_k^{t-1} - \eta^{t-1} \nabla \Phi_k(x_k^{t-1}; \xi_k^{t-1}) \stackrel{(a)}{=} x_k^{t_s} - \sum_{\ell=t_s}^{t-1} \eta^\ell \nabla \Phi_k(x_k^\ell; \xi_k^\ell). \tag{19}$$

where (a) results from unrolling the updates from Algorithm 2. Similarly, we have

$$\bar{x}^t = \bar{x}^{t-1} - \eta^{t-1} \frac{1}{K} \sum_{k=1}^K \nabla \Phi_k(x_k^{t-1}; \xi_k^{t-1}) = \bar{x}^{t_s} - \frac{1}{K} \sum_{k=1}^K \sum_{\ell=t_s}^{t-1} \eta^\ell \nabla \Phi_k(x_k^\ell; \xi_k^\ell) \tag{20}$$



Bounding Term IV, we have

$$\begin{aligned}
\text{Term IV} &:= \frac{1}{K} \sum_{k=1}^K \mathbb{E} \|x_k^t - \bar{x}^t\|^2 \\
&\stackrel{(a)}{=} \frac{1}{K} \sum_{k=1}^K \mathbb{E} \left\| \sum_{\ell=t_s}^{t-1} \eta^\ell \nabla \Phi_k(x_k^\ell; \xi_k^\ell) - \frac{1}{K} \sum_{k=1}^K \sum_{\ell=t_s}^{t-1} \eta^\ell \nabla \Phi_k(x_k^\ell; \xi_k^\ell) \right\|^2 \\
&\stackrel{(b)}{=} (I-1) \sum_{\ell=t_s}^{t-1} \frac{(\eta^\ell)^2}{K} \underbrace{\sum_{k=1}^K \mathbb{E} \left\| \nabla \Phi_k(x_k^\ell; \xi_k^\ell) - \frac{1}{K} \sum_{k=1}^K \nabla \Phi_k(x_k^\ell; \xi_k^\ell) \right\|^2}_{\text{Term VI}}
\end{aligned}$$

where (a) follows from (19) and (20) and (b) follows from the application of Lemma C.1.

Next, we bound Term VI in the above expression.

$$\begin{aligned}
\text{Term VI} &:= \mathbb{E} \left\| \nabla \Phi_k(x_k^\ell; \xi_k^\ell) - \frac{1}{K} \sum_{k=1}^K \nabla \Phi_k(x_k^\ell; \xi_k^\ell) \right\|^2 \\
&\stackrel{(a)}{=} \mathbb{E} \left\| \frac{1}{|b_{h_k}^\ell|} \sum_{i \in b_{h_k}^\ell} \nabla h_k(x_k^\ell; \xi_{k,i}^\ell) + \frac{1}{|b_{g_k}^\ell|} \sum_{j \in b_{g_k}^\ell} \nabla g_k(x_k^\ell; \zeta_{k,j}^\ell) \nabla f(\bar{y}^\ell) \right. \\
&\quad \left. - \frac{1}{K} \sum_{k=1}^K \left[ \frac{1}{|b_{h_k}^\ell|} \sum_{i \in b_{h_k}^\ell} \nabla h_k(x_k^\ell; \xi_{k,i}^\ell) + \frac{1}{|b_{g_k}^\ell|} \sum_{j \in b_{g_k}^\ell} \nabla g_k(x_k^\ell; \zeta_{k,j}^\ell) \nabla f(\bar{y}^\ell) \right] \right\|^2 \\
&\stackrel{(b)}{\leq} 2\mathbb{E} \left\| \frac{1}{|b_{h_k}^\ell|} \sum_{i \in b_{h_k}^\ell} \nabla h_k(x_k^\ell; \xi_{k,i}^\ell) - \frac{1}{K} \sum_{k=1}^K \frac{1}{|b_{h_k}^\ell|} \sum_{i \in b_{h_k}^\ell} \nabla h_k(x_k^\ell; \xi_{k,i}^\ell) \right\|^2 \\
&\quad + 2\mathbb{E} \left\| \frac{1}{|b_{g_k}^\ell|} \sum_{j \in b_{g_k}^\ell} \nabla g_k(x_k^\ell; \zeta_{k,j}^\ell) \nabla f(\bar{y}^\ell) - \frac{1}{K} \sum_{k=1}^K \frac{1}{|b_{g_k}^\ell|} \sum_{j \in b_{g_k}^\ell} \nabla g_k(x_k^\ell; \zeta_{k,j}^\ell) \nabla f(\bar{y}^\ell) \right\|^2 \\
&\stackrel{(c)}{\leq} 2\mathbb{E} \underbrace{\left\| \frac{1}{|b_{h_k}^\ell|} \sum_{i \in b_{h_k}^\ell} \nabla h_k(x_k^\ell; \xi_{k,i}^\ell) - \frac{1}{K} \sum_{k=1}^K \frac{1}{|b_{h_k}^\ell|} \sum_{i \in b_{h_k}^\ell} \nabla h_k(x_k^\ell; \xi_{k,i}^\ell) \right\|^2}_{\text{Term VII}} \\
&\quad + 2B_f^2 \mathbb{E} \underbrace{\left\| \frac{1}{|b_{g_k}^\ell|} \sum_{j \in b_{g_k}^\ell} \nabla g_k(x_k^\ell; \zeta_{k,j}^\ell) - \frac{1}{K} \sum_{k=1}^K \frac{1}{|b_{g_k}^\ell|} \sum_{j \in b_{g_k}^\ell} \nabla g_k(x_k^\ell; \zeta_{k,j}^\ell) \right\|^2}_{\text{Term VIII}},
\end{aligned}$$

where (a) results from the definition of the stochastic gradient evaluated in (7); (b) uses Lemma C.1; and (c) utilizes the Cauchy-Schwartz inequality combined with the Lipschitzness of  $f(\cdot)$ . Next, in order to upper

bound Term VI, we bound Terms VII and VIII separately. First, let us consider Term VII above

$$\begin{aligned}
\text{Term VII} &:= \mathbb{E} \left\| \frac{1}{|b_{h_k}^\ell|} \sum_{i \in b_{h_k}^\ell} \nabla h_k(x_k^\ell; \xi_{k,i}^\ell) - \frac{1}{K} \sum_{k=1}^K \frac{1}{|b_{h_k}^\ell|} \sum_{i \in b_{h_k}^\ell} \nabla h_k(x_k^\ell; \xi_{k,i}^\ell) \right\|^2 \\
&\stackrel{(a)}{\leq} 2\mathbb{E} \left\| \left[ \frac{1}{|b_{h_k}^\ell|} \sum_{i \in b_{h_k}^\ell} \nabla h_k(x_k^\ell; \xi_{k,i}^\ell) - \nabla h_k(x_k^\ell) \right] - \frac{1}{K} \sum_{k=1}^K \left[ \frac{1}{|b_{h_k}^\ell|} \sum_{i \in b_{h_k}^\ell} \nabla h_k(x_k^\ell; \xi_{k,i}^\ell) - \nabla h_k(x_k^\ell) \right] \right\|^2 \\
&\quad + 2\mathbb{E} \left\| \nabla h_k(x_k^\ell) - \frac{1}{K} \sum_{k=1}^K \nabla h_k(x_k^\ell) \right\|^2 \\
&\stackrel{(b)}{\leq} 2\mathbb{E} \left\| \frac{1}{|b_{h_k}^\ell|} \sum_{i \in b_{h_k}^\ell} \nabla h_k(x_k^\ell; \xi_{k,i}^\ell) - \nabla h_k(x_k^\ell) \right\|^2 + 2\mathbb{E} \left\| \nabla h_k(x_k^\ell) - \frac{1}{K} \sum_{k=1}^K \nabla h_k(x_k^\ell) \right\|^2 \\
&\stackrel{(c)}{\leq} \underbrace{\frac{2\sigma_h^2}{|b_{h_k}^\ell|} + 2\mathbb{E} \left\| \nabla h_k(x_k^\ell) - \frac{1}{K} \sum_{k=1}^K \nabla h_k(x_k^\ell) \right\|^2}_{\text{Term IX}},
\end{aligned}$$

where (a) utilizes Lemma C.1; (b) results from the application of Lemma C.2; and (c) results from Assumption 3.3.

Next, we bound Term IX below

$$\begin{aligned}
\text{Term IX} &:= \mathbb{E} \left\| \nabla h_k(x_k^\ell) - \frac{1}{K} \sum_{k=1}^K \nabla h_k(x_k^\ell) \right\|^2 \\
&\stackrel{(a)}{\leq} 3\mathbb{E} \left\| \nabla h_k(x_k^\ell) - \nabla h_k(\bar{x}^\ell) \right\|^2 + 3\mathbb{E} \left\| \frac{1}{K} \sum_{k=1}^K \left[ \nabla h_k(\bar{x}^\ell) - \nabla h_k(x_k^\ell) \right] \right\|^2 \\
&\quad + 3\mathbb{E} \left\| \nabla h_k(\bar{x}^\ell) - \frac{1}{K} \sum_{k=1}^K \nabla h_k(\bar{x}^\ell) \right\|^2 \\
&\stackrel{(b)}{\leq} 3L_h^2 \mathbb{E} \|x_k^\ell - \bar{x}^\ell\|^2 + \frac{3L_h^2}{K} \sum_{k=1}^K \mathbb{E} \|x_k^\ell - \bar{x}^\ell\|^2 + 3\mathbb{E} \left\| \nabla h_k(\bar{x}^\ell) - \nabla h(\bar{x}^\ell) \right\|^2 \\
&\stackrel{(c)}{\leq} 3L_h^2 \mathbb{E} \|x_k^\ell - \bar{x}^\ell\|^2 + \frac{3L_h^2}{K} \sum_{k=1}^K \mathbb{E} \|x_k^\ell - \bar{x}^\ell\|^2 + 3\Delta_h^2,
\end{aligned}$$

where (a) results from the application of Lemma C.1; (b) utilizes Lipschitz smoothness of  $h(\cdot)$  and the definition of  $h(x) = \frac{1}{K} \sum_{k=1}^K h_k(x)$ ; finally, (c) results from the bounded heterogeneity assumption Assumption 3.4. Substituting the bound on Term IX in the bound of Term VII, we get

$$\text{Term VII} \leq \frac{2\sigma_h^2}{|b_{h_k}^\ell|} + 6L_h^2 \mathbb{E} \|x_k^\ell - \bar{x}^\ell\|^2 + \frac{6L_h^2}{K} \sum_{k=1}^K \mathbb{E} \|x_k^\ell - \bar{x}^\ell\|^2 + 6\Delta_h^2.$$

Similarly, we bound Term VIII as

$$\begin{aligned}
\text{Term VIII} &:= \mathbb{E} \left\| \frac{1}{|b_{g_k}^\ell|} \sum_{j \in b_{g_k}^\ell} \nabla g_k(x_k^\ell; \zeta_{k,j}^\ell) - \frac{1}{K} \sum_{k=1}^K \frac{1}{|b_{g_k}^\ell|} \sum_{j \in b_{g_k}^\ell} \nabla g_k(x_k^\ell; \zeta_{k,j}^\ell) \right\|^2 \\
&\stackrel{(a)}{\leq} 2\mathbb{E} \left\| \left[ \frac{1}{|b_{g_k}^\ell|} \sum_{i \in b_{g_k}^\ell} \nabla g_k(x_k^\ell; \zeta_{k,i}^\ell) - \nabla g_k(x_k^\ell) \right] - \frac{1}{K} \sum_{k=1}^K \left[ \frac{1}{|b_{g_k}^\ell|} \sum_{i \in b_{g_k}^\ell} \nabla g_k(x_k^\ell; \zeta_{k,i}^\ell) - \nabla g_k(x_k^\ell) \right] \right\|^2 \\
&\quad + 2\mathbb{E} \left\| \nabla g_k(x_k^\ell) - \frac{1}{K} \sum_{k=1}^K \nabla g_k(x_k^\ell) \right\|^2 \\
&\stackrel{(b)}{\leq} 2\mathbb{E} \left\| \frac{1}{|b_{g_k}^\ell|} \sum_{i \in b_{g_k}^\ell} \nabla g_k(x_k^\ell; \zeta_{k,i}^\ell) - \nabla g_k(x_k^\ell) \right\|^2 + 2\mathbb{E} \left\| \nabla g_k(x_k^\ell) - \frac{1}{K} \sum_{k=1}^K \nabla g_k(x_k^\ell) \right\|^2 \\
&\stackrel{(c)}{\leq} \underbrace{\frac{2\sigma_g^2}{|b_{g_k}^\ell|} + 2\mathbb{E} \left\| \nabla g_k(x_k^\ell) - \frac{1}{K} \sum_{k=1}^K \nabla g_k(x_k^\ell) \right\|^2}_{\text{Term X}},
\end{aligned}$$

where (a) utilizes Lemma C.1; (b) results from the application of Lemma C.2; and (c) results from Assumption 3.3. Next, we bound Term X below

$$\begin{aligned}
\text{Term X} &:= \mathbb{E} \left\| \nabla g_k(x_k^\ell) - \frac{1}{K} \sum_{k=1}^K \nabla g_k(x_k^\ell) \right\|^2 \\
&\stackrel{(a)}{\leq} 3\mathbb{E} \left\| \nabla g_k(x_k^\ell) - \nabla g_k(\bar{x}^\ell) \right\|^2 + 3\mathbb{E} \left\| \frac{1}{K} \sum_{k=1}^K \left[ \nabla g_k(\bar{x}^\ell) - \nabla g_k(x_k^\ell) \right] \right\|^2 \\
&\quad + 3\mathbb{E} \left\| \nabla g_k(\bar{x}^\ell) - \frac{1}{K} \sum_{k=1}^K \nabla g_k(\bar{x}^\ell) \right\|^2 \\
&\stackrel{(b)}{\leq} 3L_g^2 \mathbb{E} \|x_k^\ell - \bar{x}^\ell\|^2 + \frac{3L_g^2}{K} \sum_{k=1}^K \mathbb{E} \|x_k^\ell - \bar{x}^\ell\|^2 + 3\mathbb{E} \left\| \nabla g_k(\bar{x}^\ell) - \nabla g(\bar{x}^\ell) \right\|^2 \\
&\stackrel{(c)}{\leq} 3L_g^2 \mathbb{E} \|x_k^\ell - \bar{x}^\ell\|^2 + \frac{3L_g^2}{K} \sum_{k=1}^K \mathbb{E} \|x_k^\ell - \bar{x}^\ell\|^2 + 3\Delta_g^2,
\end{aligned}$$

where (a) results from the application of Lemma C.1; (b) utilizes Lipschitz smoothness of  $g(\cdot)$  and the definition of  $g(x) = \frac{1}{K} \sum_{k=1}^K g_k(x)$ ; finally, (c) results from the bounded heterogeneity assumption Assumption 3.4. Substituting the bound on Term X in the bound of Term VIII, we get

$$\text{Term VIII} \leq \frac{2\sigma_g^2}{|b_{g_k}^\ell|} + 6L_g^2 \mathbb{E} \|x_k^\ell - \bar{x}^\ell\|^2 + \frac{6L_g^2}{K} \sum_{k=1}^K \mathbb{E} \|x_k^\ell - \bar{x}^\ell\|^2 + 6\Delta_g^2.$$

Next, we substitute the upper bounds on Terms VII and VIII in the expression of Term VI, we get

$$\begin{aligned}
\text{Term VI} &\leq \frac{4}{|b_{h_k}^\ell|} \sigma_h^2 + 12L_h^2 \mathbb{E} \|x_k^\ell - \bar{x}^\ell\|^2 + \frac{12L_h^2}{K} \sum_{k=1}^K \mathbb{E} \|x_k^\ell - \bar{x}^\ell\|^2 + 12\Delta_h^2 \\
&\quad + \frac{4B_f^2}{|b_{g_k}^\ell|} \sigma_g^2 + 12B_f^2 L_g^2 \mathbb{E} \|x_k^\ell - \bar{x}^\ell\|^2 + \frac{12B_f^2 L_g^2}{K} \sum_{k=1}^K \mathbb{E} \|x_k^\ell - \bar{x}^\ell\|^2 + 12B_f^2 \Delta_g^2 \\
&= \left(12L_h^2 + 12B_f^2 L_g^2\right) \mathbb{E} \|x_k^\ell - \bar{x}^\ell\|^2 + \left(\frac{12L_h^2 + 12B_f^2 L_g^2}{K}\right) \sum_{k=1}^K \mathbb{E} \|x_k^\ell - \bar{x}^\ell\|^2 \\
&\quad + \frac{4}{|b_{h_k}^\ell|} \sigma_h^2 + \frac{4B_f^2}{|b_{g_k}^\ell|} \sigma_g^2 + 12\Delta_h^2 + 12B_f^2 \Delta_g^2.
\end{aligned}$$

Therefore, we finally have the bound on Term IV as

$$\begin{aligned}
\text{Term IV} &\leq (I-1) \left(24L_h^2 + 24B_f^2 L_g^2\right) \sum_{\ell=t_s}^{t-1} \frac{(\eta^\ell)^2}{K} \sum_{k=1}^K \mathbb{E} \|x_k^\ell - \bar{x}^\ell\|^2 \\
&\quad + (I-1) \left(\frac{4}{|b_h^t|} \sigma_h^2 + \frac{4B_f^2}{|b_g^t|} \sigma_g^2\right) \sum_{\ell=t_s}^{t-1} (\eta^\ell)^2 + (I-1) \left(12\Delta_h^2 + 12B_f^2 \Delta_g^2\right) \sum_{\ell=t_s}^{t-1} (\eta^\ell)^2.
\end{aligned}$$

where we have chosen  $|b_{h_k}^\ell| = |b_h^t|$  and  $|b_{g_k}^\ell| = |b_g^t|$  for all  $k \in [K]$  and  $\ell \in \{0, \dots, T-1\}$ .

Therefore, we have proof of the Lemma.  $\square$

Next, we bound Term V from (18), we have

**Lemma F.5 (Descent in the estimate of  $g(x)$ ).** *Under Assumptions 3.2-3.4, the iterates generated by Algorithm 2 satisfy:*

$$\begin{aligned}
&\mathbb{E} \left\| \bar{y}^t - \frac{1}{K} \sum_{k=1}^K g_k(x_k^t) \right\|^2 \\
&\leq (1-\beta^t)^2 \mathbb{E} \left\| \bar{y}^{t-1} - \frac{1}{K} \sum_{k=1}^K g_k(x_k^{t-1}) \right\|^2 + \frac{8(\eta^t)^2(1-\beta^t)^2 B_g^2}{|b_g|K} \mathbb{E} \left\| \frac{1}{K} \sum_{k=1}^K \mathbb{E}[\Phi_k(x_k^t; \bar{\xi}_k^t) | \mathcal{F}^t] \right\|^2 \\
&\quad + \frac{(\eta^t)^2(1-\beta^t)^2 B_g^2(96L_h^2 + 96B_f^2 L_g^2)}{|b_g|K^2} \sum_{k=1}^K \mathbb{E} \|x_k^t - \bar{x}^t\|^2 + \frac{4(\eta^t)^2(1-\beta^t)^2 B_g^2}{|b_h|K} \sigma_h^2 \\
&\quad + \frac{2(\beta^t)^2 + 4(\eta^t)^2(1-\beta^t)^2 B_g^2 B_f^2}{|b_g|K} \sigma_g^2 + \frac{48(\eta^t)^2(1-\beta^t)^2 B_g^2}{|b_g|K} \Delta_h^2 + \frac{48(\eta^t)^2(1-\beta^t)^2 B_f^2 B_g^2}{|b_g|K} \Delta_g^2.
\end{aligned}$$

where we have chosen  $|b_h^t| = |b_h|$  and  $|b_{g_k}^t| = |b_g|$  for all  $k \in [K]$  and  $t \in [T]$ .

*Proof.* From the definition of Term V, we have

$$\begin{aligned}
\text{Term V} &:= \mathbb{E} \left\| \bar{y}^{t+1} - \frac{1}{K} \sum_{k=1}^K g_k(x_k^{t+1}) \right\|^2 \\
&\stackrel{(a)}{=} \mathbb{E} \left\| \frac{1}{K} \sum_{k=1}^K \left[ y_k^{t+1} - g_k(x_k^{t+1}) \right] \right\|^2 \\
&\stackrel{(b)}{=} \mathbb{E} \left\| \frac{1}{K} \sum_{k=1}^K \left[ (1-\beta^{t+1}) \left( y_k^t + \frac{1}{|b_{g_k}^{t+1}|} \sum_{i \in b_{g_k}^{t+1}} g_k(x_k^{t+1}; \zeta_{k,i}^{t+1}) - \frac{1}{|b_{g_k}^{t+1}|} \sum_{i \in b_{g_k}^{t+1}} g_k(x_k^t; \zeta_{k,i}^{t+1}) \right) \right] \right\|^2
\end{aligned}$$

$$\begin{aligned}
& + \frac{\beta^{t+1}}{|b_{g_k}^{t+1}|} \sum_{i \in b_{g_k}^{t+1}} g_k(x_k^{t+1}, \zeta_{k,i}^{t+1}) - g_k(x_k^{t+1}) \Big\|^2 \\
& \stackrel{(c)}{=} (1 - \beta^{t+1})^2 \mathbb{E} \left\| \frac{1}{K} \sum_{k=1}^K [y_k^t - g_k(x_k^t)] \right\|^2 \\
& + \mathbb{E} \left\| \frac{1}{K} \sum_{k=1}^K \left[ (1 - \beta^{t+1}) \left[ (g_k(x_k^t) - g_k(x_k^{t+1})) - \frac{1}{|b_{g_k}^{t+1}|} \sum_{i \in b_{g_k}^{t+1}} (g_k(x_k^t; \zeta_{k,i}^{t+1}) - g_k(x_k^{t+1}; \zeta_{k,i}^{t+1})) \right] \right. \right. \\
& \quad \left. \left. + \beta^{t+1} \left( \frac{1}{|b_{g_k}^{t+1}|} \sum_{i \in b_{g_k}^{t+1}} g_k(x_k^{t+1}; \zeta_{k,i}^{t+1}) - g_k(x_k^{t+1}) \right) \right] \right\|^2 \\
& \stackrel{(d)}{\leq} (1 - \beta^{t+1})^2 \mathbb{E} \left\| \bar{y}^t - \frac{1}{K} \sum_{k=1}^K g_k(x_k^t) \right\|^2 + \frac{2(\beta^{t+1})^2}{|b_g|K} \sigma_g^2 \\
& \quad + \frac{2(1 - \beta^{t+1})^2}{K^2} \sum_{k=1}^K \frac{1}{|b_g|^2} \sum_{i \in b_{g_k}^{t+1}} \mathbb{E} \left\| (g_k(x_k^t) - g(x_k^{t+1})) - (g_k(x_k^t; \zeta_{k,i}^{t+1}) - g_k(x_k^{t+1}; \zeta_{k,i}^{t+1})) \right\|^2 \\
& \stackrel{(e)}{\leq} (1 - \beta^{t+1})^2 \mathbb{E} \left\| \bar{y}^t - \frac{1}{K} \sum_{k=1}^K g_k(x_k^t) \right\|^2 + \frac{2(\beta^{t+1})^2}{|b_g|K} \sigma_g^2 \\
& \quad + \frac{2(1 - \beta^{t+1})^2}{K^2} \sum_{k=1}^K \frac{1}{|b_g|^2} \sum_{i \in b_{g_k}^{t+1}} \mathbb{E} \left\| g_k(x_k^t; \zeta_{k,i}^{t+1}) - g_k(x_k^{t+1}; \zeta_{k,i}^{t+1}) \right\|^2 \\
& \stackrel{(f)}{\leq} (1 - \beta^{t+1})^2 \mathbb{E} \left\| \bar{y}^t - \frac{1}{K} \sum_{k=1}^K g_k(x_k^t) \right\|^2 + \frac{2(\beta^{t+1})^2}{|b_g|K} \sigma_g^2 + \frac{2(1 - \beta^{t+1})^2 B_g^2}{|b_g|K^2} \sum_{k=1}^K \mathbb{E} \|x_k^{t+1} - x_k^t\|^2 \\
& \stackrel{(g)}{\leq} (1 - \beta^{t+1})^2 \mathbb{E} \left\| \bar{y}^t - \frac{1}{K} \sum_{k=1}^K g_k(x_k^t) \right\|^2 + \frac{2(\beta^{t+1})^2}{|b_g|K} \sigma_g^2 \\
& \quad + \frac{2(\eta^t)^2 (1 - \beta^{t+1})^2 B_g^2}{|b_g|K^2} \sum_{k=1}^K \underbrace{\mathbb{E} \|\nabla \Phi_k(x_k^t; \bar{\xi}_k^t)\|^2}_{\text{Term XI}},
\end{aligned}$$

where (a) follows from the definition of  $\bar{y}^{t+1}$ ; (b) uses the update rule (8) for  $y_k^{t+1}$ ; (c) results from adding and subtracting  $(1 - \beta^{t+1})g_k(x_k^t)$  and utilizing the fact that the second term in the expression has zero-mean which follows from Assumption 3.3; (d) uses Young's inequality, Assumption 3.3 and by choosing  $|b_h^t| = |b_h|$  and  $|b_{g_k}^t| = |b_g|$  for all  $k \in [K]$  and  $t \in [T]$ ; (e) results from the fact that for a random variable  $X$ , we have  $\mathbb{E}\|X - \mathbb{E}[X]\|^2 \leq \mathbb{E}\|X\|^2$ ; (f) uses the mean-squared Lipschitzness of  $g_k(\cdot)$  in Assumption 3.2; finally (g) results from the update rule of Algorithm 2.

Next, we bound Term XI below

$$\begin{aligned}
\text{Term XI} &:= \mathbb{E} \left\| \nabla \Phi_k(x_k^t; \bar{\xi}_k^t) \right\|^2 \\
&\stackrel{(a)}{\leq} 2\mathbb{E} \left\| \nabla \Phi_k(x_k^t; \bar{\xi}_k^t) - \mathbb{E}[\nabla \Phi_k(x_k^t; \bar{\xi}_k^t) | \mathcal{F}^t] \right\|^2 + 2\mathbb{E} \left\| \mathbb{E}[\nabla \Phi_k(x_k^t; \bar{\xi}_k^t) | \mathcal{F}^t] \right\|^2 \\
&\stackrel{(b)}{\leq} \frac{2\sigma_h^2}{|b_h|} + \frac{2\sigma_g^2 B_f^2}{|b_g|} + 4 \underbrace{\mathbb{E} \left\| \mathbb{E}[\nabla \Phi_k(x_k^t; \bar{\xi}_k^t) | \mathcal{F}^t] - \frac{1}{K} \sum_{k=1}^K \mathbb{E}[\nabla \Phi_k(x_k^t; \bar{\xi}_k^t) | \mathcal{F}^t] \right\|^2}_{\text{Term XII}} \\
&\quad + 4\mathbb{E} \left\| \frac{1}{K} \sum_{k=1}^K \mathbb{E}[\nabla \Phi_k(x_k^t; \bar{\xi}_k^t) | \mathcal{F}^t] \right\|^2,
\end{aligned}$$

where (a) results from the application of Young's inequality and (b) results from Assumptions 3.2 and 3.3 along with the application of Young's inequality.

Next, we bound Term XII in the above expression.

$$\begin{aligned}
\text{Term XII} &:= \mathbb{E} \left\| \mathbb{E}[\nabla \Phi_k(x_k^t; \bar{\xi}_k^t) | \mathcal{F}^t] - \frac{1}{K} \sum_{k=1}^K \mathbb{E}[\nabla \Phi_k(x_k^t; \bar{\xi}_k^t) | \mathcal{F}^t] \right\|^2 \\
&\stackrel{(a)}{=} \mathbb{E} \left\| \nabla h_k(x_k^t) + \nabla g_k(x_k^t) \nabla f(\bar{y}^t) - \left[ \frac{1}{K} \sum_{k=1}^K (\nabla h_k(x_k^t) + \nabla g_k(x_k^t) \nabla f(\bar{y}^t)) \right] \right\|^2 \\
&\stackrel{(b)}{\leq} 2\mathbb{E} \left\| \nabla h_k(x_k^t) - \frac{1}{K} \sum_{k=1}^K \nabla h_k(x_k^t) \right\|^2 + 2\mathbb{E} \left\| \nabla g_k(x_k^t) \nabla f(\bar{y}^t) - \frac{1}{K} \sum_{k=1}^K \nabla g_k(x_k^t) \nabla f(\bar{y}^t) \right\|^2 \\
&\stackrel{(c)}{\leq} \underbrace{2\mathbb{E} \left\| \nabla h_k(x_k^t) - \frac{1}{K} \sum_{k=1}^K \nabla h_k(x_k^t) \right\|^2}_{\text{Term IX}} + \underbrace{2B_f^2 \mathbb{E} \left\| \nabla g_k(x_k^t) - \frac{1}{K} \sum_{k=1}^K \nabla g_k(x_k^t) \right\|^2}_{\text{Term X}} \\
&\stackrel{(d)}{\leq} (6L_h^2 + 6B_f^2 L_g^2) \mathbb{E} \|x_k^t - \bar{x}^t\|^2 + \frac{6L_h^2 + 6B_f^2 L_g^2}{K} \sum_{k=1}^K \mathbb{E} \|x_k^t - \bar{x}^t\|^2 + 6\Delta_h^2 + 6B_f^2 \Delta_g^2
\end{aligned}$$

where (a) above uses the definition of  $\nabla \Phi_k(x_k^t; \bar{\xi}_k^t)$  in (7) and Assumption 3.3; (b) results from the application of Young's inequality; (c) utilized Assumption 3.2; finally, (d) results from the application of Assumptions 3.2 and 3.4.

Replacing in the upper bound for Term XI, we get

$$\begin{aligned}
\text{Term XI} &\leq 4\mathbb{E} \left\| \frac{1}{K} \sum_{k=1}^K \mathbb{E}[\Phi_k(x_k^t; \bar{\xi}_k^t) | \mathcal{F}^t] \right\|^2 + (24L_h^2 + 24B_f^2 L_g^2) \mathbb{E} \|x_k^t - \bar{x}^t\|^2 \\
&\quad + \frac{24L_h^2 + 24B_f^2 L_g^2}{K} \sum_{k=1}^K \mathbb{E} \|x_k^t - \bar{x}^t\|^2 + \frac{2\sigma_h^2}{|b_h|} + \frac{2\sigma_g^2 B_f^2}{|b_g|} + 24\Delta_h^2 + 24B_f^2 \Delta_g^2.
\end{aligned}$$

Substituting the bound on Term XI in the bound of Term V, we get

$$\begin{aligned}
& \mathbb{E} \left\| \bar{y}^{t+1} - \frac{1}{K} \sum_{k=1}^K g_k(x_k^{t+1}) \right\|^2 \\
& \leq (1 - \beta^{t+1})^2 \mathbb{E} \left\| \bar{y}^t - \frac{1}{K} \sum_{k=1}^K g_k(x_k^t) \right\|^2 + \frac{8(\eta^t)^2(1 - \beta^{t+1})^2 B_g^2}{|b_g|K} \mathbb{E} \left\| \frac{1}{K} \sum_{k=1}^K \mathbb{E}[\Phi_k(x_k^t; \bar{\xi}_k^t) | \mathcal{F}^t] \right\|^2 \\
& \quad + \frac{(\eta^t)^2(1 - \beta^{t+1})^2 B_g^2(96L_h^2 + 96B_f^2 L_g^2)}{|b_g|K^2} \sum_{k=1}^K \mathbb{E} \|x_k^t - \bar{x}^t\|^2 + \frac{4(\eta^t)^2(1 - \beta^{t+1})^2 B_g^2}{|b_h|K} \sigma_h^2 \\
& \quad + \frac{2(\beta^{t+1})^2 + 4(\eta^t)^2(1 - \beta^{t+1})^2 B_g^2 B_f^2}{|b_g|K} \sigma_g^2 + \frac{48(\eta^t)^2(1 - \beta^{t+1})^2 B_g^2}{|b_g|K} \Delta_h^2 + \frac{48(\eta^t)^2(1 - \beta^{t+1})^2 B_f^2 B_g^2}{|b_g|K} \Delta_g^2.
\end{aligned}$$

Therefore, we have proof of Lemma.  $\square$

Next, we show descent in the potential function specially designed to show convergence of Algorithm 2. For this purpose, we define the potential function as

$$V^t = \mathbb{E}[\Phi(\bar{x}^t)] + \mathbb{E} \left\| \bar{y}^t - \frac{1}{K} \sum_{k=1}^K g_k(x_k^t) \right\|^2. \quad (21)$$

Next, we derive the descent in the potential function.

**Lemma F.6 (Descent in potential function).** *Under Assumptions 3.2-3.4 with the choice of momentum-parameter  $\beta^{t+1} = c_\beta \eta^t$  with  $c_\beta = 4B_g^4 L_f^2$  where step-size  $\eta^t$  is chosen such that*

$$\eta^t \leq \left\{ \frac{|b_g|K}{2(L_\Phi |b_g|K + 8B_g^2)}, \frac{|b_g|K(L_h^2 + 2B_f^2 L_g^2 + 4B_g^4 L_f^2)}{B_g^2(96L_h^2 + 96B_f^2 L_g^2)} \right\}$$

*the iterates generated by Algorithm 2 satisfy*

$$\begin{aligned}
V^{t+1} - V^t & \leq -\frac{\eta^t}{2} \mathbb{E} \|\nabla \Phi(\bar{x}^t)\|^2 + \eta^t (2L_h^2 + 4B_f^2 L_g^2 + 8B_g^4 L_f^2) \frac{1}{K} \sum_{k=1}^K \mathbb{E} \|x_k^t - \bar{x}^t\|^2 \\
& \quad + \frac{2(\eta^t)^2 L_\Phi}{K|b_h|} \sigma_h^2 + \frac{4(\eta^t)^2 B_g^2}{|b_h|K} \sigma_h^2 + \frac{2(\eta^t)^2 L_\Phi B_f^2}{|b_g|K} \sigma_g^2 + \frac{(\eta^t)^2 (2c_\beta^2 + 4B_g^2 B_f^2)}{|b_g|K} \sigma_g^2 \\
& \quad + \frac{48(\eta^t)^2 B_g^2}{|b_g|K} \Delta_h^2 + \frac{48(\eta^t)^2 B_f^2 B_g^2}{|b_g|K} \Delta_g^2.
\end{aligned}$$

*Proof.* From the definition of  $V^t$  in (21) and using Lemmas F.3 and F.5, we get

$$\begin{aligned}
V^{t+1} - V^t &= \mathbb{E}[\Phi(\bar{x}^{t+1}) - \Phi(\bar{x}^t)] + \mathbb{E} \left\| \bar{y}^{t+1} - \frac{1}{K} \sum_{k=1}^K g_k(x_k^{t+1}) \right\|^2 - \mathbb{E} \left\| \bar{y}^t - \frac{1}{K} \sum_{k=1}^K g_k(x_k^t) \right\|^2 \\
&\leq -\frac{\eta^t}{2} \mathbb{E} \|\nabla \Phi(\bar{x}^t)\|^2 - \left( \frac{\eta^t}{2} - (\eta^t)^2 L_\Phi - \frac{8(\eta^t)^2 B_g^2}{|b_g|K} \right) \mathbb{E} \left\| \frac{1}{K} \sum_{k=1}^K \mathbb{E}[\nabla \Phi_k(x_k^t; \xi_k^t) | \mathcal{F}^t] \right\|^2 \\
&\quad + \left( \eta^t (L_h^2 + 2B_f^2 L_g^2 + 4B_g^4 L_F^2) + \frac{(\eta^t)^2 B_g^2 (96L_h^2 + 96B_f^2 L_g^2)}{|b_g|K} \right) \frac{1}{K} \sum_{k=1}^K \mathbb{E} \|x_k^t - \bar{x}^t\|^2 \\
&\quad + (4B_g^4 L_f^2 \eta^t - \beta^{t+1}) \mathbb{E} \left\| \bar{y}^t - \frac{1}{K} \sum_{k=1}^K g_k(x_k^t) \right\|^2 + \frac{2(\eta^t)^2 L_\Phi}{K|b_h|} \sigma_h^2 + \frac{4(\eta^t)^2 B_g^2}{|b_h|K} \sigma_h^2 \\
&\quad + \frac{2(\eta^t)^2 L_\Phi B_f^2}{|b_g|K} \sigma_g^2 + \frac{2(\beta^{t+1})^2 + 4(\eta^t)^2 B_g^2 B_f^2}{|b_g|K} \sigma_g^2 + \frac{48(\eta^t)^2 B_g^2}{|b_g|K} \Delta_h^2 + \frac{48(\eta^t)^2 B_f^2 B_g^2}{|b_g|K} \Delta_g^2 \\
&\stackrel{(a)}{\leq} -\frac{\eta^t}{2} \mathbb{E} \|\nabla \Phi(\bar{x}^t)\|^2 + \eta^t (2L_h^2 + 4B_f^2 L_g^2 + 8B_g^4 L_F^2) \frac{1}{K} \sum_{k=1}^K \mathbb{E} \|x_k^t - \bar{x}^t\|^2 \\
&\quad + \frac{2(\eta^t)^2 L_\Phi}{K|b_h|} \sigma_h^2 + \frac{4(\eta^t)^2 B_g^2}{|b_h|K} \sigma_h^2 + \frac{2(\eta^t)^2 L_\Phi B_f^2}{|b_g|K} \sigma_g^2 + \frac{(\eta^t)^2 (2c_\beta^2 + 4B_g^2 B_f^2)}{|b_g|K} \sigma_g^2 \\
&\quad + \frac{48(\eta^t)^2 B_g^2}{|b_g|K} \Delta_h^2 + \frac{48(\eta^t)^2 B_f^2 B_g^2}{|b_g|K} \Delta_g^2.
\end{aligned}$$

where (a) results from the choice of  $\beta^t$  and  $\eta_t$  given in the statement of the Lemma.

Therefore, we have the proof.  $\square$

**Theorem F.7 (Potential function).** *Under Assumptions 3.2-3.4 and the choice of step-size  $\eta^t = \eta$  such that we have*

$$\eta \leq \frac{1}{3I(24L_h^2 + 24B_f^2 L_g^2)^{1/2}}$$

*the iterates generated by Algorithm 2 satisfy*

$$\begin{aligned}
V^T - V^0 &\leq -\frac{\eta}{2} \sum_{t=0}^{T-1} \mathbb{E} \|\nabla \Phi(\bar{x}^t)\|^2 + \eta^3 (I-1)^2 \frac{(10L_h^2 + 20B_f^2 L_g^2 + 40B_g^4 L_F^2)}{|b_h|} \sigma_h^2 T \\
&\quad + \frac{2\eta^2 L_\Phi}{K|b_h|} \sigma_h^2 T + \frac{4\eta^2 B_g^2}{|b_h|K} \sigma_h^2 T + \eta^3 (I-1)^2 \frac{(10B_f^2 L_h^2 + 20B_f^4 L_g^2 + 40B_f^2 B_g^4 L_F^2)}{|b_g|} \sigma_g^2 T \\
&\quad + \frac{2\eta^2 L_\Phi B_f^2}{|b_g|K} \sigma_g^2 T + \frac{\eta^2 (2c_\beta^2 + 4B_f^2 B_g^2)}{|b_g|K} \sigma_g^2 T + \eta^3 (I-1)^2 (30L_h^2 + 60B_f^2 L_g^2 + 120B_g^4 L_F^2) \Delta_h^2 T \\
&\quad + \frac{48\eta^2 B_g^2}{|b_g|K} \Delta_h^2 T + \eta^3 (I-1)^2 (30B_f^2 L_h^2 + 60B_f^4 L_g^2 + 120B_f^2 B_g^4 L_F^2) \Delta_g^2 T + \frac{48\eta^2 B_f^2 B_g^2}{|b_g|K} \Delta_g^2 T.
\end{aligned}$$



*Proof.* Telescoping the sum of Lemma F.6 for  $t = \{0, 1, \dots, T-1\}$ , we get

$$\begin{aligned}
V^T - V^0 &\leq -\frac{\eta}{2} \sum_{t=0}^{T-1} \mathbb{E} \|\nabla \Phi(\bar{x}^t)\|^2 + \underbrace{\eta(2L_h^2 + 4B_f^2 L_g^2 + 8B_g^4 L_f^2) \sum_{t=0}^{T-1} \frac{1}{K} \sum_{k=1}^K \mathbb{E} \|x_k^t - \bar{x}^t\|^2}_{\text{Term XIII}} \\
&\quad + \frac{2\eta^2 L_\Phi}{K|b_h|} \sigma_h^2 T + \frac{4\eta^2 B_g^2}{|b_h|K} \sigma_h^2 T + \frac{2\eta^2 L_\Phi B_f^2}{|b_g|K} \sigma_g^2 T + \frac{\eta^2 (2c_\beta^2 + 4B_g^2 B_f^2)}{|b_g|K} \sigma_g^2 T \\
&\quad + \frac{48\eta^2 B_g^2}{|b_g|K} \Delta_h^2 T + \frac{48\eta^2 B_f^2 B_g^2}{|b_g|K} \Delta_g^2 T. \tag{22}
\end{aligned}$$

We bound Term XIII in (22) using Lemma (F.4). Note that we have from Lemma (F.4)

$$\begin{aligned}
\frac{1}{K} \sum_{k=1}^K \mathbb{E} \|x_k^t - \bar{x}^t\|^2 &\leq (I-1) \left( 24L_h^2 + 24B_f^2 L_g^2 \right) \sum_{\ell=t_s}^{t-1} \frac{(\eta^\ell)^2}{K} \sum_{k=1}^K \mathbb{E} \|x_k^\ell - \bar{x}^\ell\|^2 \\
&\quad + (I-1) \left( \frac{4}{|b_h^t|} \sigma_h^2 + \frac{4B_f^2}{|b_g^t|} \sigma_g^2 \right) \sum_{\ell=t_s}^{t-1} (\eta^\ell)^2 + (I-1) \left( 12\Delta_h^2 + 12B_f^2 \Delta_g^2 \right) \sum_{\ell=t_s}^{t-1} (\eta^\ell)^2
\end{aligned}$$

Summing the above from  $t = t_s$  to  $t_{s+1} - 1$ , we get

$$\begin{aligned}
\sum_{t=t_s}^{t_{s+1}-1} \frac{1}{K} \sum_{k=1}^K \mathbb{E} \|x_k^t - \bar{x}^t\|^2 &\stackrel{(a)}{\leq} \eta^2 (I-1) \left( 24L_h^2 + 24B_f^2 L_g^2 \right) \sum_{t=t_s}^{t_{s+1}-1} \sum_{\ell=t_s}^{t-1} \frac{1}{K} \sum_{k=1}^K \mathbb{E} \|x_k^\ell - \bar{x}^\ell\|^2 \\
&\quad + \eta^2 (I-1)^2 I \left( \frac{4}{|b_h^t|} \sigma_h^2 + \frac{4B_f^2}{|b_g^t|} \sigma_g^2 \right) + \eta^2 (I-1)^2 I \left( 12\Delta_h^2 + 12B_f^2 \Delta_g^2 \right) \\
&\stackrel{(b)}{\leq} \eta^2 (I-1) \left( 24L_h^2 + 24B_f^2 L_g^2 \right) \sum_{t=t_s}^{t_{s+1}-1} \sum_{\ell=t_s}^{t-1} \frac{1}{K} \sum_{k=1}^K \mathbb{E} \|x_k^\ell - \bar{x}^\ell\|^2 \\
&\quad + \eta^2 (I-1)^2 I \left( \frac{4}{|b_h^t|} \sigma_h^2 + \frac{4B_f^2}{|b_g^t|} \sigma_g^2 \right) + \eta^2 (I-1)^2 I \left( 12\Delta_h^2 + 12B_f^2 \Delta_g^2 \right) \\
&\stackrel{(c)}{\leq} \eta^2 (I-1) I \left( 24L_h^2 + 24B_f^2 L_g^2 \right) \sum_{t=t_s}^{t_{s+1}-1} \frac{1}{K} \sum_{k=1}^K \mathbb{E} \|x_k^t - \bar{x}^t\|^2 \\
&\quad + \eta^2 (I-1)^2 I \left( \frac{4}{|b_h^t|} \sigma_h^2 + \frac{4B_f^2}{|b_g^t|} \sigma_g^2 \right) + \eta^2 (I-1)^2 I \left( 12\Delta_h^2 + 12B_f^2 \Delta_g^2 \right)
\end{aligned}$$

where in (a) we have used the fact that  $\eta^t = \eta$  for all  $t \in [T]$  and  $(t-1) - t_s \leq I-1$  for  $t \in [t_s, t_{s+1}-1]$ ; (b) results from the fact that  $t \leq t_{s+1}$ ; finally, (c) again uses the fact that  $(t-1) - t_s \leq I-1$  for  $t \in [t_s, t_{s+1}-1]$ .

Summing the above from  $s = \{0, 1, \dots, S\}$  and using the fact that  $S \times I = T-1$ , we get

$$\begin{aligned}
\sum_{t=0}^{T-1} \frac{1}{K} \sum_{k=1}^K \mathbb{E} \|x_k^t - \bar{x}^t\|^2 &\leq \eta^2 I^2 \left( 24L_h^2 + 24B_f^2 L_g^2 \right) \sum_{t=0}^{T-1} \frac{1}{K} \sum_{k=1}^K \mathbb{E} \|x_k^t - \bar{x}^t\|^2 \\
&\quad + \eta^2 (I-1)^2 \left( \frac{4}{|b_h^t|} \sigma_h^2 + \frac{4B_f^2}{|b_g^t|} \sigma_g^2 \right) T + \eta^2 (I-1)^2 \left( 12\Delta_h^2 + 12B_f^2 \Delta_g^2 \right) T.
\end{aligned}$$

Rearranging the terms, we get

$$\begin{aligned}
\left( 1 - \eta^2 I^2 (24L_h^2 + 24B_f^2 L_g^2) \right) \sum_{t=0}^{T-1} \frac{1}{K} \sum_{k=1}^K \mathbb{E} \|x_k^t - \bar{x}^t\|^2 &\leq \eta^2 (I-1)^2 \left( \frac{4}{|b_h^t|} \sigma_h^2 + \frac{4B_f^2}{|b_g^t|} \sigma_g^2 \right) T \\
&\quad + \eta^2 (I-1)^2 \left( 12\Delta_h^2 + 12B_f^2 \Delta_g^2 \right) T.
\end{aligned}$$

Finally, choosing  $\eta \leq \frac{1}{3I(24L_h^2 + 24B_f^2L_g^2)^{1/2}}$ , such that we have  $1 - \eta^2 I^2(24L_h^2 + 24B_f^2L_g^2) \geq 8/9$ , utilizing this we get

$$\begin{aligned} \text{Term XIII} &:= \sum_{t=0}^{T-1} \frac{1}{K} \sum_{k=1}^K \mathbb{E} \|x_k^t - \bar{x}^t\|^2 \\ &\leq \eta^2(I-1)^2 \left( \frac{5}{|b_h^t|} \sigma_h^2 + \frac{5B_f^2}{|b_g^t|} \sigma_g^2 \right) T + \eta^2(I-1)^2 (15\Delta_h^2 + 15B_f^2\Delta_g^2) T. \end{aligned}$$

Finally, substituting the bound on Term XIII in (22), we get

$$\begin{aligned} V^T - V^0 &\leq -\frac{\eta}{2} \sum_{t=0}^{T-1} \mathbb{E} \|\nabla \Phi(\bar{x}^t)\|^2 + \eta^3(I-1)^2 \frac{(10L_h^2 + 20B_f^2L_g^2 + 40B_g^4L_F^2)}{|b_h|} \sigma_h^2 T \\ &+ \frac{2\eta^2 L_\Phi}{K|b_h|} \sigma_h^2 T + \frac{4\eta^2 B_g^2}{|b_h|K} \sigma_h^2 T + \eta^3(I-1)^2 \frac{(10B_f^2L_h^2 + 20B_f^4L_g^2 + 40B_f^2B_g^4L_F^2)}{|b_g|} \sigma_g^2 T \\ &+ \frac{2\eta^2 L_\Phi B_f^2}{|b_g|K} \sigma_g^2 T + \frac{\eta^2(2c_\beta^2 + 4B_f^2B_g^2)}{|b_g|K} \sigma_g^2 T + \eta^3(I-1)^2 (30L_h^2 + 60B_f^2L_g^2 + 120B_g^4L_F^2) \Delta_h^2 T \\ &+ \frac{48\eta^2 B_g^2}{|b_g|K} \Delta_h^2 T + \eta^3(I-1)^2 (30B_f^2L_h^2 + 60B_f^4L_g^2 + 120B_f^2B_g^4L_F^2) \Delta_g^2 T + \frac{48\eta^2 B_f^2B_g^2}{|b_g|K} \Delta_g^2 T. \end{aligned}$$

Therefore, we have the proof.  $\square$

Now, we are finally ready to prove Theorem 4.3.

*Proof.* Assuming  $|b_h| = |b_g| = |b|$  and defining  $\bar{L}_{f,g} := 10L_h^2 + B_f^2L_g^2 + 40B_g^4L_F^2$ . Rearranging the terms in the expression of Theorem F.7 and multiplying both sides by  $2/\eta T$  we get

$$\begin{aligned} \frac{1}{T} \sum_{t=0}^{T-1} \mathbb{E} \|\nabla \Phi(\bar{x}^t)\|^2 &\leq \frac{2[\Phi(\bar{x}^0) - \Phi(x^*) + \|\bar{y}^0 - g(\bar{x}^0)\|^2]}{\eta T} + \eta^2(I-1)^2 \left[ \frac{2\bar{L}_{f,g}}{|b|} \sigma_h^2 + \frac{2B_f^2\bar{L}_{f,g}}{|b|} \sigma_g^2 \right] \\ &+ \eta^2(I-1)^2 [6\bar{L}_{f,g}\Delta_h^2 + 6B_f^2\bar{L}_{f,g}\Delta_g^2] + \eta \left[ \frac{4L_\Phi + 8B_g^2}{|b|K} \sigma_h^2 + \frac{4L_\Phi B_f^2 + 4c_\beta^2 + 8B_f^2B_g^2}{|b|K} \sigma_g^2 \right] \\ &+ \eta \left[ \frac{96B_g^2}{|b|K} \Delta_h^2 + \frac{96B_f^2B_g^2}{|b|K} \Delta_g^2 \right], \end{aligned}$$

where the first term on the right follows from the fact that  $\Phi(\bar{x}^T) \geq \Phi(x^*)$  and  $\|\bar{y}^T - 1/K \sum_{k=1}^K g_k(x_k^T)\|^2 \geq 0$ .

Next, choosing  $\eta = \sqrt{\frac{|b|K}{T}}$  then for  $T \geq (216L_h^2 + 216B_f^2L_g^2)I^2|b|K$  such that  $\eta \leq \frac{1}{3I(24L_h^2 + 24B_f^2L_g^2)^{1/2}}$  in Theorem F.7 is satisfied, we get the following

$$\begin{aligned} \frac{1}{T} \sum_{t=0}^{T-1} \mathbb{E} \|\nabla \Phi(\bar{x}^t)\|^2 &\leq \frac{2[\Phi(\bar{x}^0) - \Phi(x^*) + \|\bar{y}^0 - g(\bar{x}^0)\|^2]}{\sqrt{|b|KT}} + \frac{K(I-1)^2}{T} [2\bar{L}_{f,g}\sigma_h^2 + 2B_f^2\bar{L}_{f,g}\sigma_g^2] \\ &+ \frac{|b|K(I-1)^2}{T} [6\bar{L}_{f,g}\Delta_h^2 + 6B_f^2\bar{L}_{f,g}\Delta_g^2] + \frac{1}{\sqrt{|b|KT}} [(4L_\Phi + 8B_g^2)\sigma_h^2 + (4L_\Phi B_f^2 + 4c_\beta^2 + 8B_f^2B_g^2)\sigma_g^2] \\ &+ \frac{1}{\sqrt{|b|KT}} [96B_g^2\Delta_h^2 + 96B_f^2B_g^2\Delta_g^2], \end{aligned}$$

Explicitly choosing  $I = T^{1/4}/(|b|K)^{3/4}$ , we get

$$\begin{aligned} \mathbb{E}\|\nabla\Phi(\bar{x}^{a(T)})\|^2 &\leq \frac{2[\Phi(\bar{x}^0) - \Phi(x^*) + \|\bar{y}^0 - g(\bar{x}^0)\|^2]}{\sqrt{|b|KT}} + \frac{C_{\sigma_h}}{\sqrt{|b|KT}}\sigma_h^2 + \frac{C_{\sigma_g}}{\sqrt{|b|KT}}\sigma_g^2 \\ &\quad + \frac{C_{\Delta_h}}{\sqrt{|b|KT}}\Delta_h^2 + \frac{C_{\Delta_g}}{\sqrt{|b|KT}}\Delta_g^2. \end{aligned}$$

where the constants  $C_{\sigma_h}$ ,  $C_{\sigma_g}$ ,  $C_{\Delta_h}$ , and  $C_{\Delta_g}$  are defined as:

$$\begin{aligned} C_{\sigma_h} &= 2\bar{L}_{f,g} + 4L_\Phi + 8B_g^2 \\ C_{\sigma_g} &= 2B_f^2\bar{L}_{f,g} + 4L_\Phi B_f^2 + 4c_\beta^2 + 8B_f^2B_g^2 \\ C_{\Delta_h} &= 6\bar{L}_{f,g} + 96B_g^2 \\ C_{\Delta_g} &= 6B_f^2\bar{L}_{f,g} + 96B_f^2B_g^2. \end{aligned}$$

The constant  $c_\beta$  is defined in the statement of Lemma F.6.

Hence, Theorem 4.3 is proved.  $\square$

## G Proof of Theorem 5.2

Let us restate Theorem 5.2 for convenience.

**Theorem G.1.** *For Algorithm 3, choosing the local step-sizes  $\eta^t = \eta = \mathcal{O}(\sqrt{1/TI})$  and the momentum parameter  $\beta = c_\beta\eta$  for all  $t \in \{0, 1, \dots, T-1\}$ . Choosing the server step-sizes  $\gamma_x = \mathcal{O}(\sqrt{K/T})$  and  $\gamma_y = c_{\gamma_y}\gamma_x$ . Then under Assumptions 3.2, 3.3, 3.4, and 5.1 for  $\bar{x}^{a(T)}$  chosen According to Algorithm 3, we have*

$$\mathbb{E}\|\nabla\Phi(\bar{x}^{a(T)})\|^2 \leq \mathcal{C}_{Sync}\mathcal{O}\left(\sqrt{\frac{1}{KT}}\right) + \mathcal{C}_{Drift}\mathcal{O}\left(\frac{1}{T}\right),$$

for some constants  $c_\beta$ ,  $c_{\gamma_y}$ ,  $\mathcal{C}_{Sync}$  and  $\mathcal{C}_{Drift}$ .

We note that the proof of Theorem G.1 although different, will follow the structure of the proof of FedDRO and the steps of the proof of (Yang et al., 2024), therefore, we omit the detailed proofs.

Let us first state the main lemmas utilized in the proof of the theorem.

**Lemma G.2 (Descent in function value).** *Under Assumptions 3.2-5.1, the iterates generated by Algorithm 3 satisfy*

$$\begin{aligned} \mathbb{E}[\Phi(x^{\tau+1}) - \Phi(x^\tau)] &\leq -\frac{\gamma_x\eta I}{2}\mathbb{E}\|\nabla\Phi(x^\tau)\|^2 \\ &\quad - \left[\frac{\gamma_x\eta I}{2} - \frac{L_\Phi^2\gamma_x^2\eta^2 I^2}{2}\right]\mathbb{E}\left\|\frac{1}{K}\sum_{k=1}^K\frac{1}{I}\sum_{t=\tau I}^{(\tau+1)I-1}\mathbb{E}[\nabla\Phi_k(x_k^t; \bar{\xi}_k^t)|\mathcal{G}_t]\right\| \\ &\quad + \frac{\gamma_x^2\eta^2 I^2 L_\Phi^2}{2}\left[\frac{\sigma_h^2 + B_f^2\sigma_g^2}{KI}\right] \\ &\quad + \gamma_x\eta I[L_h^2 + 2B_f^2L_g^2 + 16B_g^4L_f^2]\frac{1}{K}\sum_{k=1}^K\frac{1}{I}\sum_{t=\tau I}^{(\tau+1)I-1}\mathbb{E}\|x_k^{t+1} - x^\tau\|^2 \\ &\quad + \gamma_x\eta I[12B_g^2L_f^2]\frac{1}{K}\sum_{k=1}^K\frac{1}{I}\sum_{t=\tau I}^{(\tau+1)I-1}\mathbb{E}\|y_k^t - y^\tau\|^2 \\ &\quad + \gamma_x\eta I[12B_g^2L_f^2]\mathbb{E}\|y^\tau - g(x^\tau)\|^2. \end{aligned}$$

**Lemma G.3 (Drift in  $y$ -updates).** *Under Assumptions 3.2-5.1, the iterates generated by Algorithm 3 satisfy*

$$\frac{1}{K} \sum_{k=1}^K \frac{1}{I} \sum_{t=\tau I}^{(\tau+1)I-1} \mathbb{E} \|y_k^t - y^\tau\|^2 \leq \frac{\beta^2 I}{1 - 4\beta^2 I} \left[ \sigma_g^2 + 4\Delta_g^2 + 4\eta^2 I B_g^2 \sigma_X^2 + 4\mathbb{E} \|y^\tau - g(x^\tau)\|^2 \right],$$

where  $\sigma_X^2$  is defined as  $\sigma_X^2 := 3\sigma_h^2 + 3B_f^2\sigma_g^2 + 6B_h^2 + 6B_g^2B_f^2$ .

**Lemma G.4 (Drift in  $x$ -updates).** *Under Assumptions 3.2-5.1, the iterates generated by Algorithm 3 satisfy*

$$\frac{1}{K} \sum_{k=1}^K \frac{1}{I} \sum_{t=\tau I}^{(\tau+1)I-1} \mathbb{E} \|x_k^{t+1} - x^\tau\|^2 \leq \eta^2 I \sigma_X^2.$$

Similarly, we bound the term

$$\mathbb{E} \|x^{\tau+1} - x^\tau\|^2 \leq \gamma_x^2 \eta^2 I \sigma_X^2.$$

**Lemma G.5 (Descent in the estimate of  $y$ ).** *Under Assumptions 3.2-5.1, the iterates generated by Algorithm 3 satisfy*

$$\begin{aligned} \mathbb{E} \|y^{\tau+1} - g(x^{\tau+1})\|^2 - \mathbb{E} \|y^\tau - g(x^\tau)\|^2 &\leq [\delta + 6I^2\gamma_y^2\beta^2 - \gamma_y\beta I] \mathbb{E} \|y^\tau - g(x^\tau)\| \\ &\quad + \left[ \frac{6\gamma_y^2\beta^2 I^2}{K} + 8\gamma_y\beta I \right] \left[ \frac{1}{K} \sum_{k=1}^K \frac{1}{I} \sum_{t=\tau I}^{(\tau+1)I-1} \mathbb{E} \|y_k^t - y^\tau\|^2 + B_g^2 \mathbb{E} \|x_k^{t+1} - x^\tau\|^2 \right] \\ &\quad + B_g^2 \mathbb{E} \|x^{\tau+1} - x^\tau\|^2 + \left[ \frac{4B_g^2}{\delta_1} + \frac{L_g}{2} \right] \sigma_X^2 \gamma_x^2 \eta^2 I, \end{aligned}$$

where  $\delta := \delta_1 + \frac{\eta^2 \gamma_x^2 I L_g}{2} \sigma_X^2$  and  $\delta_1 > 0$  is a parameter to be chosen later.

Next, we design the potential function as

$$V_\tau = \mathbb{E} [\Phi(x^\tau) + \|y^\tau - g(x^\tau)\|^2],$$

and our goal is to analyze the descent in the potential function. We analyze the term

$$V_{\tau+1} - V_\tau = \mathbb{E} [\Phi(x^{\tau+1}) - \Phi(x^\tau)] + \mathbb{E} [\|y^{\tau+1} - g(x^{\tau+1})\|^2 - \|y^\tau - g(x^\tau)\|^2] \quad (23)$$

Choosing the learning rates such that, we have

$$\begin{aligned} \delta_1 &= B_g^2 L_f^2 \gamma_x \eta I, \gamma_y \beta \leq \frac{8}{6KI}, \beta \leq \frac{3}{64} \gamma_y, \beta \leq \frac{1}{\sqrt{8I}}, \eta \gamma_x \leq \frac{2B_g^2 L_f^2}{L_g \sigma_X^2}, \\ \delta &\leq 2B_g^2 L_f^2 \gamma_x \eta I, \gamma_y^2 \beta^2 \leq \frac{2b_g^2 l_f^2 \gamma_x \eta}{I}, \gamma_y \beta \leq 28B_g^2 L_f^2 \gamma_x \eta, \gamma_x \eta \leq \frac{1}{L_\Phi^2 I} \end{aligned}$$

This choice of parameters implies that we will have

$$\begin{aligned}
V_{\tau+1} - V_\tau &= \mathbb{E}[\Phi(x^{\tau+1}) - \Phi(x^\tau)] + \mathbb{E}[\|y^{\tau+1} - g(x^{\tau+1})\|^2 - \|y^\tau - g(x^\tau)\|^2] \\
&\leq -\frac{\gamma_x \eta I}{2} \mathbb{E} \|\nabla \Phi(x^\tau)\|^2 \\
&\quad + \frac{\gamma_x^2 \eta^2 I^2 L_\Phi^2}{2} \left[ \frac{\sigma_h^2 + B_f^2 \sigma_g^2}{KI} \right] \\
&\quad + \gamma_x \eta I [L_h^2 + 2B_f^2 L_g^2 + 16B_g^4 L_f^2] \times \eta^2 I \sigma_X^2 \\
&\quad + \gamma_x \eta I [12B_g^2 L_f^2] \times 2\beta^2 I [\sigma_g^2 + 4\Delta_g^2 + 4\eta^2 I B_g^2 \sigma_X^2] \\
&\quad + \left[ \frac{6\gamma_y^2 \beta^2 I^2}{K} + 8\gamma_y \beta I \right] 2\beta^2 I [\sigma_g^2 + 4\Delta_g^2 + 4\eta^2 I B_g^2 \sigma_X^2] \\
&\quad + \left[ \frac{6\gamma_y^2 \beta^2 I^2}{K} + 8\gamma_y \beta I \right] B_g^2 \eta^2 I \sigma_X^2 \\
&\quad + B_g^2 \gamma_x^2 \eta^2 I \sigma_X^2 + \left[ \frac{4B_g^2}{\delta_1} + \frac{L_g}{2} \right] \sigma_X^2 \gamma_x^2 \eta^2 I,
\end{aligned}$$

Finally, rearranging the terms and multiplying both sides by  $\frac{2}{\gamma_x \eta I}$ , telescoping the sum, and choosing the step-sizes such that we have

$$\begin{aligned}
\gamma_x &= \mathcal{O}\left(\sqrt{\frac{K}{T}}\right), \gamma_y = \mathcal{O}\left(\sqrt{\frac{K}{T}}\right) \\
\eta &= \mathcal{O}\left(\frac{1}{\sqrt{TI}}\right), \beta = \mathcal{O}\left(\frac{1}{\sqrt{TI}}\right)
\end{aligned}$$

This yields the statement of the theorem. □
